# Supplementary material for: Integrative Genomics of the Mammalian Alveolar Macrophage Response to Intracellular Mycobacteria
Source: Research Square preprint supplement (doi:10.21203/rs.3.rs-121955/v1), 2020-12-10
Supplement: Supplementary file 1 [file 0954815ccd8cdf59dc441714.xlsx]

## Sheet: Contents
Integrative genomics of the mammalian alveolar macrophage response to intracellular mycobacteria
Thomas J. Hall, Michael P. Mullen, Gillian P. McHugo, Kate E. Killick, Siobhán C. Ring, Donagh P. Berry, Carolina N. Correia, John A. Browne, Stephen V. Gordon, David E. MacHugh*
* Corresponding author: David E. MacHugh
Corresponding author email address:				david.machugh@ucd.ie
S5 Dataset: 100 random (RAN) input gene sets used for GWAS integration
Worksheet 1		100 sets of 250 random genes used for GWAS integration (RAN)

## Sheet: 1) Random (RAN) gene input sets
Random set number	Gene number	NCBI Gene ID	Gene symbol	Ensembl gene ID	Ensembl transcript ID	RefSeq mRNA ID	Description	Chromosome no.	Start position	End position	Strand
Set_001	Gene_001	513531	ITGB1BP1	ENSBTAG00000013063	ENSBTAT00000017362	NM_001034448	integrin subunit beta 1 binding protein 1 [Source:VGNC Symbol;Acc:VGNC:30325]	11	88013833	88030303	1
Set_001	Gene_002	530239	FGF23	ENSBTAG00000030343	ENSBTAT00000008940		fibroblast growth factor 23 [Source:VGNC Symbol;Acc:VGNC:28978]	5	105717373	105726492	1
Set_001	Gene_003	526026	ZNF711	ENSBTAG00000002668	ENSBTAT00000074467	NM_001205925	zinc finger protein 711 [Source:VGNC Symbol;Acc:VGNC:37337]	X	66972303	67003075	-1
Set_001	Gene_004	NA		ENSBTAG00000054751	ENSBTAT00000084245			16	5004975	5021006	1
Set_001	Gene_005	NA		ENSBTAG00000014862	ENSBTAT00000019791			16	10453902	10454549	1
Set_001	Gene_006	NA		ENSBTAG00000053094	ENSBTAT00000085099			28	33414344	33427015	-1
Set_001	Gene_007	281151	EXT2	ENSBTAG00000019644	ENSBTAT00000026177	NM_177496	exostosin glycosyltransferase 2 [Source:VGNC Symbol;Acc:VGNC:28666]	15	74203659	74352950	1
Set_001	Gene_008	100313956	IFNT3	ENSBTAG00000050661	ENSBTAT00000079907	NM_001168275	interferon tau-3 [Source:NCBI gene;Acc:100313956]	8	22575915	22583545	-1
Set_001	Gene_009	282385	TMSB10	ENSBTAG00000005654	ENSBTAT00000007429	NM_174623	thymosin beta 10 [Source:NCBI gene;Acc:282385]	11	50094264	50095274	-1
Set_001	Gene_010	NA	bta-mir-2285ai	ENSBTAG00000054040	ENSBTAT00000073928		bta-mir-2285ai [Source:miRBase;Acc:MI0032946]	27	19451207	19451285	1
Set_001	Gene_011	513152	RHOC	ENSBTAG00000014299	ENSBTAT00000018998	NM_001046138	ras homolog family member C [Source:VGNC Symbol;Acc:VGNC:55672]	3	30617923	30624465	1
Set_001	Gene_012	NA		ENSBTAG00000051176	ENSBTAT00000067253			16	45578386	45602488	-1
Set_001	Gene_013	NA		ENSBTAG00000049491	ENSBTAT00000069633			13	60873655	60876483	1
Set_001	Gene_014	NA		ENSBTAG00000055267	ENSBTAT00000070421			26	18133161	18195083	1
Set_001	Gene_015	100335553		ENSBTAG00000051367	ENSBTAT00000068106		zinc finger protein 415-like [Source:NCBI gene;Acc:100335553]	18	59354795	59356054	-1
Set_001	Gene_016	104972276		ENSBTAG00000050494	ENSBTAT00000079328		prolactin-inducible protein homolog [Source:NCBI gene;Acc:104972276]	4	106506468	106513124	1
Set_001	Gene_017	NA	RF00026	ENSBTAG00000044671	ENSBTAT00000062104			20	68278778	68278881	-1
Set_001	Gene_018	510095	TASOR	ENSBTAG00000019748	ENSBTAT00000026317	NM_001205393	transcription activation suppressor [Source:VGNC Symbol;Acc:VGNC:28783]	22	44353226	44404518	1
Set_001	Gene_019	540719	KPNA3	ENSBTAG00000004850	ENSBTAT00000072923	NM_001192773	karyopherin subunit alpha 3 [Source:VGNC Symbol;Acc:VGNC:30702]	12	19243142	19339516	-1
Set_001	Gene_020	517171	SAR1A	ENSBTAG00000016858	ENSBTAT00000022422	NM_001034521	secretion associated Ras related GTPase 1A [Source:VGNC Symbol;Acc:VGNC:34286]	28	26384597	26396614	-1
Set_001	Gene_021	535622	MAP3K8	ENSBTAG00000011600	ENSBTAT00000015413	NM_001099071	mitogen-activated protein kinase kinase kinase 8 [Source:VGNC Symbol;Acc:VGNC:31202]	13	35293958	35321804	1
Set_001	Gene_022	281293	MAOA	ENSBTAG00000016206	ENSBTAT00000021570	NM_181014	monoamine oxidase A [Source:VGNC Symbol;Acc:VGNC:31174]	X	99933437	100014113	-1
Set_001	Gene_023	NA		ENSBTAG00000054209	ENSBTAT00000066740			25	37574348	37577809	-1
Set_001	Gene_024	516056	BEX5	ENSBTAG00000014670	ENSBTAT00000019530	NM_001075735	brain expressed X-linked 5 [Source:VGNC Symbol;Acc:VGNC:50553]	X	50182852	50185139	1
Set_001	Gene_025	787225		ENSBTAG00000038759	ENSBTAT00000056308	NM_001099398	keratin associated protein-like [Source:NCBI gene;Acc:787225]	19	41253424	41254098	-1
Set_001	Gene_026	539960	STX11	ENSBTAG00000011236	ENSBTAT00000014922		syntaxin 11 [Source:VGNC Symbol;Acc:VGNC:35431]	9	81523929	81574347	1
Set_001	Gene_027	NA		ENSBTAG00000039834	ENSBTAT00000057263			26	21843146	21844360	-1
Set_001	Gene_028	515532	ENTPD8	ENSBTAG00000030246	ENSBTAT00000016080	NM_001077927	ectonucleoside triphosphate diphosphohydrolase 8 [Source:VGNC Symbol;Acc:VGNC:28513]	11	106414236	106418732	-1
Set_001	Gene_029	518653	POLE2	ENSBTAG00000004931	ENSBTAT00000006488	NM_001105383	DNA polymerase epsilon 2, accessory subunit [Source:VGNC Symbol;Acc:VGNC:33119]	10	42673879	42705616	-1
Set_001	Gene_030	112448617	RF00568	ENSBTAG00000045360	ENSBTAT00000062793			10	36175266	36175381	-1
Set_001	Gene_031	614895		ENSBTAG00000024713	ENSBTAT00000025129		olfactory receptor 2T1 [Source:NCBI gene;Acc:614895]	7	40196749	40197732	-1
Set_001	Gene_032	104975683	HIST1H2AG	ENSBTAG00000053792	ENSBTAT00000068092		histone cluster 1, H2ag [Source:NCBI gene;Acc:616790]	23	31766348	31766740	1
Set_001	Gene_033	NA		ENSBTAG00000050499	ENSBTAT00000077144			13	52407159	52409863	-1
Set_001	Gene_034	NA		ENSBTAG00000054555	ENSBTAT00000070938			22	7039077	7042599	1
Set_001	Gene_035	511680	TRIOBP	ENSBTAG00000002539	ENSBTAT00000042716		TRIO and F-actin binding protein [Source:VGNC Symbol;Acc:VGNC:36357]	5	109532805	109591861	1
Set_001	Gene_036	505719	MINDY1	ENSBTAG00000015329	ENSBTAT00000033792	NM_001045924	MINDY lysine 48 deubiquitinase 1 [Source:VGNC Symbol;Acc:VGNC:55615]	3	19766326	19775894	1
Set_001	Gene_037	510841	PDK3	ENSBTAG00000017832	ENSBTAT00000023706	NM_001101934	pyruvate dehydrogenase kinase 3 [Source:VGNC Symbol;Acc:VGNC:32705]	X	118815749	118898708	-1
Set_001	Gene_038	100125876	GLMP	ENSBTAG00000006364	ENSBTAT00000008351	NM_001105476	glycosylated lysosomal membrane protein [Source:VGNC Symbol;Acc:VGNC:29409]	3	14506327	14509256	1
Set_001	Gene_039	280840	LIF	ENSBTAG00000007424	ENSBTAT00000009761	NM_173931	LIF, interleukin 6 family cytokine [Source:VGNC Symbol;Acc:VGNC:30880]	17	69262954	69269513	-1
Set_001	Gene_040	112446519	RF00026	ENSBTAG00000051837	ENSBTAT00000082185		RNA, U6 small nuclear 812, pseudogene [Source:HGNC Symbol;Acc:HGNC:47775]	4	63310162	63310268	1
Set_001	Gene_041	615916	LSM6	ENSBTAG00000014060	ENSBTAT00000018681	NM_001114519	LSM6 homolog, U6 small nuclear RNA and mRNA degradation associated [Source:VGNC Symbol;Acc:VGNC:31058]	17	12162216	12177198	-1
Set_001	Gene_042	281812	FGFBP1	ENSBTAG00000031497	ENSBTAT00000044642	NM_174337	fibroblast growth factor binding protein 1 [Source:NCBI gene;Acc:281812]	6	111124401	111127372	-1
Set_001	Gene_043	NA	RF00156	ENSBTAG00000044375	ENSBTAT00000061808			2	133428969	133429056	-1
Set_001	Gene_044	510495	LMBRD1	ENSBTAG00000016164	ENSBTAT00000021518	NM_001035092	LMBR1 domain containing 1 [Source:VGNC Symbol;Acc:VGNC:30924]	9	8607136	8739663	-1
Set_001	Gene_045	520058	MAP4K2	ENSBTAG00000001037	ENSBTAT00000001378	NM_001206275	mitogen-activated protein kinase kinase kinase kinase 2 [Source:VGNC Symbol;Acc:VGNC:31205]	29	43028075	43040939	-1
Set_001	Gene_046	518062	SLC17A9	ENSBTAG00000001829	ENSBTAT00000044985	NM_001100378	solute carrier family 17 member 9 [Source:VGNC Symbol;Acc:VGNC:34704]	13	54445511	54460268	-1
Set_001	Gene_047	614345	ARPC5	ENSBTAG00000045582	ENSBTAT00000064442	NM_001035447	actin related protein 2/3 complex subunit 5 [Source:VGNC Symbol;Acc:VGNC:26165]	16	64674639	64684247	-1
Set_001	Gene_048	540234	TENT5A	ENSBTAG00000000995	ENSBTAT00000001319		terminal nucleotidyltransferase 5A [Source:VGNC Symbol;Acc:VGNC:28815]	9	21497810	21504915	-1
Set_001	Gene_049	100139730	COL15A1	ENSBTAG00000010082	ENSBTAT00000072268		collagen type XV alpha 1 chain [Source:VGNC Symbol;Acc:VGNC:27556]	8	63974402	64077938	1
Set_001	Gene_050	NA		ENSBTAG00000054142	ENSBTAT00000069712			19	39511265	39512249	1
Set_001	Gene_051	NA		ENSBTAG00000049464	ENSBTAT00000084093			19	11709490	11710566	1
Set_001	Gene_052	NA		ENSBTAG00000051314	ENSBTAT00000067094			21	34561706	34563739	1
Set_001	Gene_053	NA		ENSBTAG00000048693	ENSBTAT00000068588			5	110251653	110270520	-1
Set_001	Gene_054	NA	bta-mir-10182	ENSBTAG00000055130	ENSBTAT00000077339		bta-mir-10182 [Source:miRBase;Acc:MI0032941]	1	74829775	74829854	1
Set_001	Gene_055	505648	PGM3	ENSBTAG00000000679	ENSBTAT00000086526		phosphoglucomutase 3 [Source:VGNC Symbol;Acc:VGNC:32796]	9	23088493	23116895	-1
Set_001	Gene_056	515766	AP1M2	ENSBTAG00000021160	ENSBTAT00000067244		adaptor related protein complex 1 subunit mu 2 [Source:VGNC Symbol;Acc:VGNC:25980]	7	15074208	15086196	-1
Set_001	Gene_057	532856	ANKRD11	ENSBTAG00000016006	ENSBTAT00000085664		ankyrin repeat domain 11 [Source:VGNC Symbol;Acc:VGNC:25910]	18	14327315	14446553	-1
Set_001	Gene_058	NA	LAMA2	ENSBTAG00000010229	ENSBTAT00000073403		laminin subunit alpha 2 [Source:VGNC Symbol;Acc:VGNC:57353]	9	67153459	67556512	1
Set_001	Gene_059	NA		ENSBTAG00000050911	ENSBTAT00000082674			22	52721264	52730200	1
Set_001	Gene_060	533378	MYLK2	ENSBTAG00000014930	ENSBTAT00000071955		myosin light chain kinase 2 [Source:VGNC Symbol;Acc:VGNC:31806]	13	61355025	61369702	1
Set_001	Gene_061	NA		ENSBTAG00000017169	ENSBTAT00000022804			14	41547135	41547515	1
Set_001	Gene_062	617455	CCDC85C	ENSBTAG00000025181	ENSBTAT00000076041		coiled-coil domain containing 85C [Source:VGNC Symbol;Acc:VGNC:26925]	21	64523697	64601628	-1
Set_001	Gene_063	112444654	RF00003	ENSBTAG00000045491	ENSBTAT00000065955		RNA, U1 small nuclear 73, pseudogene [Source:HGNC Symbol;Acc:HGNC:48415]	27	38169291	38169455	1
Set_001	Gene_064	505547	PRPF39	ENSBTAG00000002603	ENSBTAT00000076978		pre-mRNA processing factor 39 [Source:VGNC Symbol;Acc:VGNC:33377]	21	54809297	54844780	1
Set_001	Gene_065	112448167	RF00410	ENSBTAG00000043068	ENSBTAT00000060060			9	46786513	46786644	1
Set_001	Gene_066	505394	APOA2	ENSBTAG00000009212	ENSBTAT00000012138	NM_001045916	apolipoprotein A2 [Source:VGNC Symbol;Acc:VGNC:26023]	3	8282869	8284122	1
Set_001	Gene_067	614880	PPM1H	ENSBTAG00000011857	ENSBTAT00000015736	NM_001193049	protein phosphatase, Mg2+/Mn2+ dependent 1H [Source:VGNC Symbol;Acc:VGNC:33214]	5	50634073	50938091	1
Set_001	Gene_068	NA		ENSBTAG00000006727	ENSBTAT00000008843			22	25346897	25351308	1
Set_001	Gene_069	100141289	USP13	ENSBTAG00000005946	ENSBTAT00000061390	NM_001191266	ubiquitin specific peptidase 13 [Source:VGNC Symbol;Acc:VGNC:52841]	1	87355950	87482259	-1
Set_001	Gene_070	539884	RFX5	ENSBTAG00000017580	ENSBTAT00000067767	NM_001205726	regulatory factor X5 [Source:VGNC Symbol;Acc:VGNC:33897]	3	19463618	19470141	1
Set_001	Gene_071	506638	ZNF18	ENSBTAG00000004675	ENSBTAT00000006133	NM_001206494	zinc finger protein 18 [Source:VGNC Symbol;Acc:VGNC:37216]	19	30616167	30640005	-1
Set_001	Gene_072	537776	DEUP1	ENSBTAG00000035110	ENSBTAT00000049593	NM_001206892	deuterosome assembly protein 1 [Source:VGNC Symbol;Acc:VGNC:28016]	29	1403401	1549941	-1
Set_001	Gene_073	NA		ENSBTAG00000053085	ENSBTAT00000070952			8	51612264	51614362	1
Set_001	Gene_074	NA		ENSBTAG00000052770	ENSBTAT00000066430			29	30553263	30576986	1
Set_001	Gene_075	537297	DOCK11	ENSBTAG00000006439	ENSBTAT00000008444	NM_001076090	dedicator of cytokinesis 11 [Source:VGNC Symbol;Acc:VGNC:28156]	X	2680554	3007250	1
Set_001	Gene_076	508729	TMED4	ENSBTAG00000010612	ENSBTAT00000014027	NM_001206433	transmembrane p24 trafficking protein 4 [Source:VGNC Symbol;Acc:VGNC:35937]	4	76859613	76862453	1
Set_001	Gene_077	524484	TMEM184A	ENSBTAG00000004676	ENSBTAT00000006135	NM_001046272	transmembrane protein 184A [Source:VGNC Symbol;Acc:VGNC:36009]	25	41391488	41402061	1
Set_001	Gene_078	538817	MRM3	ENSBTAG00000019162	ENSBTAT00000025502		mitochondrial rRNA methyltransferase 3 [Source:VGNC Symbol;Acc:VGNC:31607]	19	22060689	22065001	-1
Set_001	Gene_079	NA		ENSBTAG00000053620	ENSBTAT00000078823			15	32763495	32766642	-1
Set_001	Gene_080	NA		ENSBTAG00000053791	ENSBTAT00000083166			16	50503873	50508942	-1
Set_001	Gene_081	781458	KLHL42	ENSBTAG00000006372	ENSBTAT00000008359	NM_001205415	kelch like family member 42 [Source:VGNC Symbol;Acc:VGNC:30667]	5	82047183	82063595	-1
Set_001	Gene_082	504813	NPY1R	ENSBTAG00000047586	ENSBTAT00000087149		neuropeptide Y receptor Y1 [Source:VGNC Symbol;Acc:VGNC:32223]	6	2433427	2442870	1
Set_001	Gene_083	540957	VHL	ENSBTAG00000016101	ENSBTAT00000030804	NM_001110019	von Hippel-Lindau tumor suppressor [Source:NCBI gene;Acc:540957]	22	16714931	16719806	-1
Set_001	Gene_084	515235	CCDC80	ENSBTAG00000010793	ENSBTAT00000070413		coiled-coil domain containing 80 [Source:VGNC Symbol;Acc:VGNC:26918]	1	57364375	57478155	-1
Set_001	Gene_085	616246	ARHGAP15	ENSBTAG00000032289	ENSBTAT00000061453	NM_001105003	Rho GTPase activating protein 15 [Source:VGNC Symbol;Acc:VGNC:26076]	2	52965089	53630365	-1
Set_001	Gene_086	100297800		ENSBTAG00000052488	ENSBTAT00000067731		serine peptidase inhibitor, Kazal type 9 [Source:NCBI gene;Acc:100297800]	7	59739538	59753439	1
Set_001	Gene_087	NA	RF00001	ENSBTAG00000045114	ENSBTAT00000062547			29	29319098	29319214	-1
Set_001	Gene_088	100297006		ENSBTAG00000050173	ENSBTAT00000085160		chromosome 1 C3orf85 homolog [Source:NCBI gene;Acc:100297006]	1	53901976	53919631	1
Set_001	Gene_089	539195	HMGB4	ENSBTAG00000000335	ENSBTAT00000000438	NM_001040562	high mobility group box 4 [Source:VGNC Symbol;Acc:VGNC:29876]	3	111927003	111927727	-1
Set_001	Gene_090	529059	MEOX1	ENSBTAG00000015751	ENSBTAT00000054676	NM_001035376	mesenchyme homeobox 1 [Source:VGNC Symbol;Acc:VGNC:31386]	19	43548089	43566761	-1
Set_001	Gene_091	NA		ENSBTAG00000050931	ENSBTAT00000077263			10	318860	323234	-1
Set_001	Gene_092	NA		ENSBTAG00000050744	ENSBTAT00000073815			10	608008	608328	1
Set_001	Gene_093	NA	RF00001	ENSBTAG00000045297	ENSBTAT00000062730			7	13536862	13536952	1
Set_001	Gene_094	613401		ENSBTAG00000033806	ENSBTAT00000009936		peptidylprolyl isomerase A (cyclophilin A)-like [Source:NCBI gene;Acc:613401]	4	31570207	31570769	1
Set_001	Gene_095	101907103	MRPL40	ENSBTAG00000019891	ENSBTAT00000026501		mitochondrial ribosomal protein L40 [Source:VGNC Symbol;Acc:VGNC:31636]	17	72693872	72696274	1
Set_001	Gene_096	784932		ENSBTAG00000026917	ENSBTAT00000038516		serpin A3-7-like [Source:NCBI gene;Acc:784932]	21	59405098	59413707	-1
Set_001	Gene_097	540879	MAP3K7CL	ENSBTAG00000007444	ENSBTAT00000071361		MAP3K7 C-terminal like [Source:VGNC Symbol;Acc:VGNC:31201]	1	7005502	7053831	-1
Set_001	Gene_098	327690	NDUFB1	ENSBTAG00000015156	ENSBTAT00000020160	NM_175809	NADH:ubiquinone oxidoreductase subunit B1 [Source:NCBI gene;Acc:327690]	21	56801789	56808775	-1
Set_001	Gene_099	NA	RF00003	ENSBTAG00000045379	ENSBTAT00000062812			24	25088899	25089045	-1
Set_001	Gene_100	509157	NHEJ1	ENSBTAG00000031041	ENSBTAT00000043942	NM_001075393	non-homologous end joining factor 1 [Source:VGNC Symbol;Acc:VGNC:32064]	2	107020701	107112857	-1
Set_001	Gene_101	519219	SERPINI2	ENSBTAG00000011423	ENSBTAT00000015176	NM_001102054	serpin family I member 2 [Source:VGNC Symbol;Acc:VGNC:34482]	1	99995832	100031888	1
Set_001	Gene_102	282038	RLBP1	ENSBTAG00000033721	ENSBTAT00000047900	NM_174451	retinaldehyde binding protein 1 [Source:VGNC Symbol;Acc:VGNC:33989]	21	20695021	20709983	-1
Set_001	Gene_103	616379	SELENON	ENSBTAG00000021778	ENSBTAT00000029033	NM_001114976	selenoprotein N [Source:VGNC Symbol;Acc:VGNC:56142]	2	127256063	127272993	-1
Set_001	Gene_104	504472	DNAJC13	ENSBTAG00000002966	ENSBTAT00000003865	NM_001113745	DnaJ heat shock protein family (Hsp40) member C13 [Source:VGNC Symbol;Acc:VGNC:53532]	1	137051554	137215251	-1
Set_001	Gene_105	NA		ENSBTAG00000049097	ENSBTAT00000084530			7	51897197	51897604	-1
Set_001	Gene_106	100299092	FEZ2	ENSBTAG00000009021	ENSBTAT00000011880	NM_001193050	fasciculation and elongation protein zeta 2 [Source:VGNC Symbol;Acc:VGNC:28958]	11	19023725	19068890	-1
Set_001	Gene_107	539274	AKNA	ENSBTAG00000017306	ENSBTAT00000023012		AT-hook transcription factor [Source:VGNC Symbol;Acc:VGNC:55031]	8	103556544	103604933	-1
Set_001	Gene_108	533115	MSH2	ENSBTAG00000002742	ENSBTAT00000003556	NM_001034584	mutS homolog 2 [Source:VGNC Symbol;Acc:VGNC:31693]	11	29804956	29886276	1
Set_001	Gene_109	NA		ENSBTAG00000051832	ENSBTAT00000086804			20	70975390	70987354	-1
Set_001	Gene_110	NA		ENSBTAG00000054747	ENSBTAT00000072157			25	20822314	20845124	1
Set_001	Gene_111	NA		ENSBTAG00000005895	ENSBTAT00000007745			11	47341507	47342176	1
Set_001	Gene_112	506713	CD82	ENSBTAG00000031252	ENSBTAT00000078576	NM_001097990	CD82 molecule [Source:VGNC Symbol;Acc:VGNC:27049]	15	74642574	74699576	1
Set_001	Gene_113	787596	RALGAPB	ENSBTAG00000003040	ENSBTAT00000003956		Ral GTPase activating protein non-catalytic beta subunit [Source:VGNC Symbol;Acc:VGNC:33703]	13	67377908	67449822	1
Set_001	Gene_114	NA		ENSBTAG00000049650	ENSBTAT00000073503			20	5628141	5628553	-1
Set_001	Gene_115	513869		ENSBTAG00000046268	ENSBTAT00000006472		NKG2-A/NKG2-B type II integral membrane protein [Source:NCBI gene;Acc:513869]	5	99099765	99105058	-1
Set_001	Gene_116	100126230		ENSBTAG00000040202	ENSBTAT00000055882	NM_001110098	JY-1 [Source:NCBI gene;Acc:100126230]	29	17406353	17422378	1
Set_001	Gene_117	NA	bta-mir-2285bz	ENSBTAG00000051488	ENSBTAT00000063165		bta-mir-2285bz [Source:miRBase;Acc:MI0038370]	13	56850176	56850235	-1
Set_001	Gene_118	539292	PARD6G	ENSBTAG00000005917	ENSBTAT00000007772	NM_001098100	par-6 family cell polarity regulator gamma [Source:VGNC Symbol;Acc:VGNC:32585]	24	341633	418744	1
Set_001	Gene_119	NA		ENSBTAG00000053432	ENSBTAT00000055245			15	79091856	79093207	-1
Set_001	Gene_120	505645	TMOD4	ENSBTAG00000018071	ENSBTAT00000046331	NM_001075215	tropomodulin 4 [Source:VGNC Symbol;Acc:VGNC:36137]	3	19637443	19641926	1
Set_001	Gene_121	616323		ENSBTAG00000031828	ENSBTAT00000045140	NM_001046578	uncharacterized LOC616323 [Source:NCBI gene;Acc:616323]	11	49302385	49306958	-1
Set_001	Gene_122	445416	FZD4	ENSBTAG00000040128	ENSBTAT00000061370	NM_001206269	frizzled class receptor 4 [Source:VGNC Symbol;Acc:VGNC:29168]	29	8618154	8623002	1
Set_001	Gene_123	514807	HABP4	ENSBTAG00000011586	ENSBTAT00000015392	NM_001081523	hyaluronan binding protein 4 [Source:VGNC Symbol;Acc:VGNC:29736]	8	83156981	83193125	1
Set_001	Gene_124	NA		ENSBTAG00000051457	ENSBTAT00000080125			6	66874604	66989648	-1
Set_001	Gene_125	535323	POLQ	ENSBTAG00000001920	ENSBTAT00000085647		DNA polymerase theta [Source:VGNC Symbol;Acc:VGNC:33130]	1	65944699	66053204	-1
Set_001	Gene_126	NA	ZNF114	ENSBTAG00000047616	ENSBTAT00000064414		zinc finger protein 114 [Source:VGNC Symbol;Acc:VGNC:49990]	18	54997342	55002137	1
Set_001	Gene_127	505545	BSDC1	ENSBTAG00000020655	ENSBTAT00000067186	NM_001035026	BSD domain containing 1 [Source:VGNC Symbol;Acc:VGNC:26578]	2	121176081	121199884	1
Set_001	Gene_128	518121	CDC42BPG	ENSBTAG00000009736	ENSBTAT00000066761		CDC42 binding protein kinase gamma [Source:VGNC Symbol;Acc:VGNC:27071]	29	43058767	43077323	-1
Set_001	Gene_129	785436	KLF14	ENSBTAG00000052251	ENSBTAT00000071808		Kruppel like factor 14 [Source:NCBI gene;Acc:785436]	4	94523445	94524428	-1
Set_001	Gene_130	112444944	RF00026	ENSBTAG00000043146	ENSBTAT00000060138		RNA, U6 small nuclear 670, pseudogene [Source:HGNC Symbol;Acc:HGNC:47633]	29	44403042	44403148	-1
Set_001	Gene_131	616015	C11H9orf16	ENSBTAG00000014150	ENSBTAT00000018807	NM_001195050	chromosome 11 C9orf16 homolog [Source:NCBI gene;Acc:616015]	11	98789901	98793297	1
Set_001	Gene_132	533964	INTS9	ENSBTAG00000008845	ENSBTAT00000049079	NM_001046363	integrator complex subunit 9 [Source:VGNC Symbol;Acc:VGNC:30234]	8	9840507	9967280	1
Set_001	Gene_133	512325	SLC25A38	ENSBTAG00000022721	ENSBTAT00000020606	NM_001014905	solute carrier family 25 member 38 [Source:VGNC Symbol;Acc:VGNC:34763]	22	12645751	12660388	1
Set_001	Gene_134	100294908	PATE1	ENSBTAG00000052688	ENSBTAT00000086166		prostate and testis expressed 1 [Source:NCBI gene;Acc:100294908]	29	29154132	29157048	1
Set_001	Gene_135	112448582	WDR36	ENSBTAG00000005489	ENSBTAT00000066827		WD repeat domain 36 [Source:VGNC Symbol;Acc:VGNC:36894]	10	93774543	93813580	1
Set_001	Gene_136	514086	CDK5RAP1	ENSBTAG00000018535	ENSBTAT00000080951		CDK5 regulatory subunit associated protein 1 [Source:VGNC Symbol;Acc:VGNC:27130]	13	62821113	62883927	-1
Set_001	Gene_137	521378	CITED2	ENSBTAG00000011224	ENSBTAT00000014907	NM_001075819	Cbp/p300 interacting transactivator with Glu/Asp rich carboxy-terminal domain 2 [Source:VGNC Symbol;Acc:VGNC:27377]	9	77046182	77048572	-1
Set_001	Gene_138	NA	MIR30E	ENSBTAG00000029871	ENSBTAT00000042250		microRNA 30e [Source:HGNC Symbol;Acc:HGNC:31629]	3	105460870	105460975	-1
Set_001	Gene_139	NA	RF00001	ENSBTAG00000049693	ENSBTAT00000084020			NKLS02001352.1	20130	20249	-1
Set_001	Gene_140	NA	C19H17orf50	ENSBTAG00000045621	ENSBTAT00000063115		chromosome 19 C17orf50 homolog [Source:VGNC Symbol;Acc:VGNC:52653]	19	14614634	14615948	-1
Set_001	Gene_141	504812		ENSBTAG00000048542	ENSBTAT00000077448		pregnancy-associated glycoprotein 1 [Source:NCBI gene;Acc:504812]	29	37824655	37833543	-1
Set_001	Gene_142	NA		ENSBTAG00000050861	ENSBTAT00000079293			4	112184180	112196007	1
Set_001	Gene_143	539344	ASB12	ENSBTAG00000007211	ENSBTAT00000009484	NM_001192225	ankyrin repeat and SOCS box containing 12 [Source:VGNC Symbol;Acc:VGNC:26189]	X	96102890	96104560	1
Set_001	Gene_144	NA		ENSBTAG00000051401	ENSBTAT00000076137			20	8186992	8207511	-1
Set_001	Gene_145	614719	TMEM117	ENSBTAG00000032148	ENSBTAT00000045612	NM_001101233	transmembrane protein 117 [Source:VGNC Symbol;Acc:VGNC:35954]	5	36014715	36610297	-1
Set_001	Gene_146	100313085	bta-mir-874	ENSBTAG00000037307	ENSBTAT00000051807		bta-mir-874 [Source:miRBase;Acc:MI0009900]	7	49091396	49091471	-1
Set_001	Gene_147	281295	MAP4	ENSBTAG00000015839	ENSBTAT00000030619		microtubule associated protein 4 [Source:NCBI gene;Acc:281295]	22	51814681	51907742	1
Set_001	Gene_148	509969	CLSTN3	ENSBTAG00000008129	ENSBTAT00000010687	NM_001075425	calsyntenin 3 [Source:VGNC Symbol;Acc:VGNC:27468]	5	103220647	103250646	-1
Set_001	Gene_149	NA		ENSBTAG00000030834	ENSBTAT00000043597			11	77600906	77601361	1
Set_001	Gene_150	534661	PAX8	ENSBTAG00000019354	ENSBTAT00000025783		paired box 8 [Source:VGNC Symbol;Acc:VGNC:32599]	11	46917080	46980824	-1
Set_001	Gene_151	100299556		ENSBTAG00000050270	ENSBTAT00000064956		olfactory receptor-like protein OLF3 [Source:NCBI gene;Acc:100299556]	4	107097390	107098343	1
Set_001	Gene_152	782731		ENSBTAG00000049963	ENSBTAT00000052609		olfactory receptor 10A3-like [Source:NCBI gene;Acc:782731]	15	44603788	44607540	1
Set_001	Gene_153	NA		ENSBTAG00000053282	ENSBTAT00000074687			6	84765519	84804507	-1
Set_001	Gene_154	539020	BCL6	ENSBTAG00000001511	ENSBTAT00000001978		BCL6, transcription repressor [Source:NCBI gene;Acc:539020]	1	79558314	79611183	1
Set_001	Gene_155	NA		ENSBTAG00000050360	ENSBTAT00000087249			8	7457340	7459111	-1
Set_001	Gene_156	539728	MOCS3	ENSBTAG00000049509	ENSBTAT00000070167	NM_001081734	molybdenum cofactor synthesis 3 [Source:NCBI gene;Acc:539728]	13	78870212	78871579	1
Set_001	Gene_157	NA	bta-mir-10173	ENSBTAG00000048610	ENSBTAT00000072373		bta-mir-10173 [Source:miRBase;Acc:MI0032926]	19	48086371	48086469	-1
Set_001	Gene_158	785042	HOOK1	ENSBTAG00000030671	ENSBTAT00000033420	NM_001206870	hook microtubule tethering protein 1 [Source:VGNC Symbol;Acc:VGNC:29905]	3	86093399	86163267	-1
Set_001	Gene_159	NA		ENSBTAG00000049087	ENSBTAT00000082586			13	69239616	69241015	-1
Set_001	Gene_160	NA		ENSBTAG00000050407	ENSBTAT00000081363			28	16149886	16154736	1
Set_001	Gene_161	517396		ENSBTAG00000015095	ENSBTAT00000078518		tetratricopeptide repeat domain 6 [Source:NCBI gene;Acc:517396]	21	47810137	47998810	1
Set_001	Gene_162	538606	PPP1R12A	ENSBTAG00000014609	ENSBTAT00000061600		protein phosphatase 1 regulatory subunit 12A [Source:VGNC Symbol;Acc:VGNC:33223]	5	9311402	9477553	-1
Set_001	Gene_163	NA	PGPEP1L	ENSBTAG00000021531	ENSBTAT00000028693		pyroglutamyl-peptidase I like [Source:VGNC Symbol;Acc:VGNC:32800]	21	8090744	8103335	-1
Set_001	Gene_164	NA		ENSBTAG00000048672	ENSBTAT00000075763			20	31440034	31441779	-1
Set_001	Gene_165	NA		ENSBTAG00000050623	ENSBTAT00000086341			5	5186972	5192249	-1
Set_001	Gene_166	NA		ENSBTAG00000015149	ENSBTAT00000020152			22	46919070	46920844	1
Set_001	Gene_167	100336651	PIM3	ENSBTAG00000045904	ENSBTAT00000063193		Pim-3 proto-oncogene, serine/threonine kinase [Source:VGNC Symbol;Acc:VGNC:32901]	5	119348910	119351736	1
Set_001	Gene_168	528518		ENSBTAG00000049123	ENSBTAT00000081381		epididymis-specific alpha-mannosidase-like [Source:NCBI gene;Acc:528518]	6	113103765	113156369	1
Set_001	Gene_169	281696	CLIC5	ENSBTAG00000010244	ENSBTAT00000013537	NM_174276	chloride intracellular channel 5 [Source:NCBI gene;Acc:281696]	23	19185150	19351221	-1
Set_001	Gene_170	513265	CDKN2AIP	ENSBTAG00000000957	ENSBTAT00000001266	NM_001046143	CDKN2A interacting protein [Source:NCBI gene;Acc:513265]	27	14260409	14263949	1
Set_001	Gene_171	NA		ENSBTAG00000054977	ENSBTAT00000069920			29	5653275	5667685	-1
Set_001	Gene_172	508345	APIP	ENSBTAG00000018257	ENSBTAT00000024300	NM_001075352	APAF1 interacting protein [Source:VGNC Symbol;Acc:VGNC:26016]	15	65403011	65427122	-1
Set_001	Gene_173	100139803	TMEFF1	ENSBTAG00000021991	ENSBTAT00000029325	NM_001205476	transmembrane protein with EGF like and two follistatin like domains 1 [Source:NCBI gene;Acc:100139803]	8	90238685	90335315	1
Set_001	Gene_174	100298738	SCAF8	ENSBTAG00000031917	ENSBTAT00000069259		SR-related CTD associated factor 8 [Source:VGNC Symbol;Acc:VGNC:52823]	9	91412046	91605253	1
Set_001	Gene_175	515352	GLYATL2	ENSBTAG00000030847	ENSBTAT00000043617		glycine-N-acyltransferase like 2 [Source:VGNC Symbol;Acc:VGNC:29427]	15	82122690	82192681	-1
Set_001	Gene_176	532896	IRX5	ENSBTAG00000004838	ENSBTAT00000078441		iroquois homeobox 5 [Source:VGNC Symbol;Acc:VGNC:30289]	18	23234761	23240750	1
Set_001	Gene_177	781302	GPR88	ENSBTAG00000021101	ENSBTAT00000028110	NM_001205412	G protein-coupled receptor 88 [Source:VGNC Symbol;Acc:VGNC:29604]	3	42742344	42744302	-1
Set_001	Gene_178	NA		ENSBTAG00000051722	ENSBTAT00000067552			25	2406430	2411215	1
Set_001	Gene_179	282330	PTGER3	ENSBTAG00000019230	ENSBTAT00000075500		prostaglandin E receptor 3 [Source:VGNC Symbol;Acc:VGNC:33503]	3	74185666	74228359	1
Set_001	Gene_180	528378	HAUS1	ENSBTAG00000002512	ENSBTAT00000082251		HAUS augmin like complex subunit 1 [Source:VGNC Symbol;Acc:VGNC:29757]	24	45853705	45864846	1
Set_001	Gene_181	530174	RNF215	ENSBTAG00000003394	ENSBTAT00000071886		ring finger protein 215 [Source:VGNC Symbol;Acc:VGNC:34052]	17	69378978	69382634	-1
Set_001	Gene_182	NA		ENSBTAG00000053545	ENSBTAT00000076429			26	42420916	42432455	1
Set_001	Gene_183	540784	C1H21orf91	ENSBTAG00000001395	ENSBTAT00000001832	NM_001037617	chromosome 1 C21orf91 homolog [Source:VGNC Symbol;Acc:VGNC:52664]	1	19227894	19256713	1
Set_001	Gene_184	528475	POU2AF1	ENSBTAG00000006282	ENSBTAT00000008246	NM_001075915	POU class 2 associating factor 1 [Source:VGNC Symbol;Acc:VGNC:33173]	15	21635824	21660814	-1
Set_001	Gene_185	NA		ENSBTAG00000053901	ENSBTAT00000080297			10	29036666	29107859	-1
Set_001	Gene_186	615350	CCDC189	ENSBTAG00000031765	ENSBTAT00000045037	NM_001195631	coiled-coil domain containing 189 [Source:VGNC Symbol;Acc:VGNC:26882]	25	26876842	26882751	-1
Set_001	Gene_187	524282		ENSBTAG00000015517	ENSBTAT00000020621		olfactory receptor 5W2 [Source:NCBI gene;Acc:524282]	16	560059	560997	-1
Set_001	Gene_188	3283885	MT-ND4L	ENSBTAG00000043559	ENSBTAT00000060543		mitochondrially encoded NADH:ubiquinone oxidoreductase core subunit 4L [Source:VGNC Symbol;Acc:VGNC:55744]	MT	10239	10535	1
Set_001	Gene_189	102466614	bta-mir-6121	ENSBTAG00000054210	ENSBTAT00000083756		bta-mir-6121 [Source:miRBase;Acc:MI0021139]	16	75196717	75196779	1
Set_001	Gene_190	537739	KATNAL1	ENSBTAG00000009340	ENSBTAT00000052665	NM_001192918	katanin catalytic subunit A1 like 1 [Source:VGNC Symbol;Acc:VGNC:30406]	12	30478919	30533274	1
Set_001	Gene_191	617886	OR51M1	ENSBTAG00000019549	ENSBTAT00000026051		olfactory receptor 51M1 [Source:NCBI gene;Acc:617878]	15	48239359	48240321	-1
Set_001	Gene_192	100313418	bta-mir-2356	ENSBTAG00000044630	ENSBTAT00000062063		bta-mir-2356 [Source:miRBase;Acc:MI0011385]	2	106011329	106011401	-1
Set_001	Gene_193	100140999	ZNF214	ENSBTAG00000020289	ENSBTAT00000027039		zinc finger protein 214 [Source:VGNC Symbol;Acc:VGNC:49994]	15	45737686	45740602	1
Set_001	Gene_194	790064	C19H17orf80	ENSBTAG00000006089	ENSBTAT00000069316		chromosome 19 C17orf80 homolog [Source:VGNC Symbol;Acc:VGNC:52660]	19	58084841	58095624	-1
Set_001	Gene_195	515146	XYLB	ENSBTAG00000011278	ENSBTAT00000076358		xylulokinase [Source:VGNC Symbol;Acc:VGNC:37011]	22	11776966	11816612	1
Set_001	Gene_196	786629	E2F8	ENSBTAG00000017446	ENSBTAT00000086675		E2F transcription factor 8 [Source:VGNC Symbol;Acc:VGNC:28292]	29	25699093	25717254	1
Set_001	Gene_197	NA		ENSBTAG00000054091	ENSBTAT00000066718			10	22913859	22914509	1
Set_001	Gene_198	768056	OARD1	ENSBTAG00000005975	ENSBTAT00000007840	NM_001077113	O-acyl-ADP-ribose deacylase 1 [Source:VGNC Symbol;Acc:VGNC:32390]	23	14992681	14998169	-1
Set_001	Gene_199	528783	SDF4	ENSBTAG00000015642	ENSBTAT00000020778	NM_001035375	stromal cell derived factor 4 [Source:VGNC Symbol;Acc:VGNC:34387]	16	51270270	51282975	1
Set_001	Gene_200	NA		ENSBTAG00000019994	ENSBTAT00000026631			2	91270021	91271660	-1
Set_001	Gene_201	NA	RF00001	ENSBTAG00000054122	ENSBTAT00000073191			8	107941497	107941615	1
Set_001	Gene_202	NA		ENSBTAG00000045718	ENSBTAT00000065325			3	14409894	14410001	-1
Set_001	Gene_203	521864	VPS35	ENSBTAG00000002493	ENSBTAT00000003239	NM_001046258	VPS35, retromer complex component [Source:VGNC Symbol;Acc:VGNC:36818]	18	14984970	15012555	-1
Set_001	Gene_204	112442766	RF00026	ENSBTAG00000053075	ENSBTAT00000077963			19	45071025	45071131	-1
Set_001	Gene_205	615110	ACER3	ENSBTAG00000017218	ENSBTAT00000052101	NM_001102285	alkaline ceramidase 3 [Source:VGNC Symbol;Acc:VGNC:25538]	15	56246885	56403904	1
Set_001	Gene_206	533044	PSAT1	ENSBTAG00000013960	ENSBTAT00000018554	NM_001102150	phosphoserine aminotransferase 1 [Source:VGNC Symbol;Acc:VGNC:55075]	8	54216465	54245158	1
Set_001	Gene_207	786231		ENSBTAG00000030672	ENSBTAT00000043364		zinc finger and BTB domain-containing protein 26-like [Source:NCBI gene;Acc:786231]	3	105246277	105247600	1
Set_001	Gene_208	613578	UBXN2A	ENSBTAG00000002033	ENSBTAT00000002634	NM_001192967	UBX domain protein 2A [Source:VGNC Symbol;Acc:VGNC:36625]	11	75052239	75081213	-1
Set_001	Gene_209	NA		ENSBTAG00000052814	ENSBTAT00000073388			X	127322761	127324933	1
Set_001	Gene_210	NA	SLC9B1	ENSBTAG00000009673	ENSBTAT00000027774		solute carrier family 9 member B1 [Source:HGNC Symbol;Acc:HGNC:24244]	6	21861338	21928497	1
Set_001	Gene_211	506402	CHD4	ENSBTAG00000014734	ENSBTAT00000019612	NM_001206501	chromodomain helicase DNA binding protein 4 [Source:VGNC Symbol;Acc:VGNC:27280]	5	103817796	103847333	1
Set_001	Gene_212	507470	SEPHS1	ENSBTAG00000008821	ENSBTAT00000079168		selenophosphate synthetase 1 [Source:VGNC Symbol;Acc:VGNC:34448]	13	28007772	28034343	-1
Set_001	Gene_213	100138604	PKD1L3	ENSBTAG00000019884	ENSBTAT00000086520		polycystin 1 like 3, transient receptor potential channel interacting [Source:VGNC Symbol;Acc:VGNC:32934]	18	39085074	39165547	1
Set_001	Gene_214	NA	RF00100	ENSBTAG00000045304	ENSBTAT00000062737			20	55252862	55253162	1
Set_001	Gene_215	767977	MPC1	ENSBTAG00000027879	ENSBTAT00000040201	NM_001077042	mitochondrial pyruvate carrier 1 [Source:VGNC Symbol;Acc:VGNC:31569]	9	101357585	101370280	-1
Set_001	Gene_216	100313066	bta-mir-551a	ENSBTAG00000030099	ENSBTAT00000042478		bta-mir-551a [Source:miRBase;Acc:MI0009863]	16	49472683	49472777	1
Set_001	Gene_217	NA		ENSBTAG00000050143	ENSBTAT00000071686			9	87224033	87225536	1
Set_001	Gene_218	112441923	RF00026	ENSBTAG00000048910	ENSBTAT00000073704		RNA, U6 small nuclear 1104, pseudogene [Source:HGNC Symbol;Acc:HGNC:48067]	16	31444367	31444473	-1
Set_001	Gene_219	614320	IAH1	ENSBTAG00000001140	ENSBTAT00000032849	NM_001034758	isoamyl acetate hydrolyzing esterase 1 (putative) [Source:VGNC Symbol;Acc:VGNC:30016]	11	87961968	87973214	-1
Set_001	Gene_220	539204	LRRC8D	ENSBTAG00000020958	ENSBTAT00000027912	NM_001083741	leucine rich repeat containing 8 VRAC subunit D [Source:VGNC Symbol;Acc:VGNC:31032]	3	53313193	53443924	-1
Set_001	Gene_221	100313428	bta-mir-2398	ENSBTAG00000045112	ENSBTAT00000062545		bta-mir-2398 [Source:miRBase;Acc:MI0011439]	27	19351413	19351491	-1
Set_001	Gene_222	618139		ENSBTAG00000009763	ENSBTAT00000052182		olfactory receptor 6C75 [Source:NCBI gene;Acc:618139]	28	44448732	44451045	1
Set_001	Gene_223	NA		ENSBTAG00000053630	ENSBTAT00000081511			NKLS02001214.1	231539	232066	-1
Set_001	Gene_224	281032	BTG1	ENSBTAG00000020330	ENSBTAT00000027091		BTG anti-proliferation factor 1 [Source:VGNC Symbol;Acc:VGNC:26597]	5	22012139	22016602	-1
Set_001	Gene_225	NA		ENSBTAG00000054869	ENSBTAT00000080877			10	57691317	57701117	1
Set_001	Gene_226	NA		ENSBTAG00000052680	ENSBTAT00000071742			8	76110783	76116977	-1
Set_001	Gene_227	523680		ENSBTAG00000048043	ENSBTAT00000064645		olfactory receptor 149 [Source:NCBI gene;Acc:523680]	29	26961246	26962181	1
Set_001	Gene_228	281625	ANXA4	ENSBTAG00000001105	ENSBTAT00000001463	NM_001001440	annexin A4 [Source:VGNC Symbol;Acc:VGNC:25966]	11	68096833	68171538	1
Set_001	Gene_229	504844	RPA1	ENSBTAG00000009711	ENSBTAT00000012812	NM_001075176	replication protein A1 [Source:VGNC Symbol;Acc:VGNC:34094]	19	22899633	22946071	1
Set_001	Gene_230	532018	TMEM86A	ENSBTAG00000048059	ENSBTAT00000082332		transmembrane protein 86A [Source:VGNC Symbol;Acc:VGNC:36116]	29	26067884	26073981	-1
Set_001	Gene_231	NA		ENSBTAG00000051492	ENSBTAT00000075154			6	14853110	14857020	1
Set_001	Gene_232	100313433	bta-mir-2284b	ENSBTAG00000044548	ENSBTAT00000061981		bta-mir-2284b [Source:miRBase;Acc:MI0011465]	4	47094216	47094286	-1
Set_001	Gene_233	538783	TBXA2R	ENSBTAG00000014944	ENSBTAT00000019892	NM_001167919	thromboxane A2 receptor [Source:VGNC Symbol;Acc:VGNC:35673]	7	20334826	20343537	1
Set_001	Gene_234	112447207	RF00026	ENSBTAG00000055128	ENSBTAT00000072219			6	101835188	101835294	-1
Set_001	Gene_235	281903	LOXL1	ENSBTAG00000009086	ENSBTAT00000011978	NM_174383	lysyl oxidase like 1 [Source:VGNC Symbol;Acc:VGNC:30952]	21	34663151	34687592	-1
Set_001	Gene_236	NA		ENSBTAG00000054712	ENSBTAT00000086735			1	91599763	91603343	1
Set_001	Gene_237	NA		ENSBTAG00000050015	ENSBTAT00000085721			8	58188709	58190416	1
Set_001	Gene_238	NA		ENSBTAG00000014133	ENSBTAT00000018785			1	66771565	66772604	1
Set_001	Gene_239	514028	DSE	ENSBTAG00000005205	ENSBTAT00000076070	NM_001113232	dermatan sulfate epimerase [Source:VGNC Symbol;Acc:VGNC:53789]	9	34276663	34353054	-1
Set_001	Gene_240	NA		ENSBTAG00000054907	ENSBTAT00000068761			1	88323245	88328935	-1
Set_001	Gene_241	112447648	RF00026	ENSBTAG00000050541	ENSBTAT00000078903			7	26722503	26722609	1
Set_001	Gene_242	112445221	RF00026	ENSBTAG00000049229	ENSBTAT00000060397			X	127375478	127375581	1
Set_001	Gene_243	515024	STRADA	ENSBTAG00000000056	ENSBTAT00000053961		STE20-related kinase adaptor alpha [Source:VGNC Symbol;Acc:VGNC:35418]	19	47979733	48007680	-1
Set_001	Gene_244	NA		ENSBTAG00000050698	ENSBTAT00000082805			14	76762728	76772304	1
Set_001	Gene_245	100140139	TMEM196	ENSBTAG00000044012	ENSBTAT00000076912	NM_001206771	transmembrane protein 196 [Source:VGNC Symbol;Acc:VGNC:36018]	4	28422955	28496683	-1
Set_001	Gene_246	100124525	CX3CR1	ENSBTAG00000002923	ENSBTAT00000003797	NM_001102558	C-X3-C motif chemokine receptor 1 [Source:VGNC Symbol;Acc:VGNC:27845]	22	12569452	12583576	-1
Set_001	Gene_247	NA		ENSBTAG00000052184	ENSBTAT00000069522			10	22194383	22194861	1
Set_001	Gene_248	509855	IRF9	ENSBTAG00000005816	ENSBTAT00000064992	NM_001024506	interferon regulatory factor 9 [Source:VGNC Symbol;Acc:VGNC:30280]	10	20986934	20992851	-1
Set_001	Gene_249	NA	RF00026	ENSBTAG00000043611	ENSBTAT00000060603			10	70865407	70865504	1
Set_001	Gene_250	532945	CYP20A1	ENSBTAG00000000851	ENSBTAT00000001132	NM_001015644	cytochrome P450, family 20, subfamily A, polypeptide 1 [Source:NCBI gene;Acc:532945]	2	91483594	91527751	1
Set_002	Gene_001	526279	CASP7	ENSBTAG00000006615	ENSBTAT00000008706		caspase 7 [Source:VGNC Symbol;Acc:VGNC:26783]	26	34153506	34187199	1
Set_002	Gene_002	281833	HSPE1	ENSBTAG00000012589	ENSBTAT00000078821		heat shock protein family E (Hsp10) member 1 [Source:VGNC Symbol;Acc:VGNC:49071]	2	86044912	86048062	1
Set_002	Gene_003	786290	MN1	ENSBTAG00000010464	ENSBTAT00000052340		MN1 proto-oncogene, transcriptional regulator [Source:VGNC Symbol;Acc:VGNC:31536]	17	67173546	67221633	-1
Set_002	Gene_004	615134	UNC5CL	ENSBTAG00000002919	ENSBTAT00000003791		unc-5 family C-terminal like [Source:VGNC Symbol;Acc:VGNC:36673]	23	14951493	14963734	-1
Set_002	Gene_005	NA	RF00413	ENSBTAG00000053221	ENSBTAT00000070560			8	106660224	106660365	1
Set_002	Gene_006	539475		ENSBTAG00000050705	ENSBTAT00000080299		family with sequence similarity 133 member B [Source:NCBI gene;Acc:539475]	4	9909855	9926242	-1
Set_002	Gene_007	NA		ENSBTAG00000000425	ENSBTAT00000005580		60S ribosomal protein L17 [Source:UniProtKB/Swiss-Prot;Acc:Q3T025]	21	45341894	45342812	1
Set_002	Gene_008	100498819	bta-mir-2897	ENSBTAG00000046388	ENSBTAT00000063111		bta-mir-2897 [Source:miRBase;Acc:MI0013072]	18	53789899	53789967	1
Set_002	Gene_009	112448162	RF00186	ENSBTAG00000042275	ENSBTAT00000059267		small nucleolar RNA, C/D box 101 [Source:HGNC Symbol;Acc:HGNC:32764]	9	70977616	70977688	1
Set_002	Gene_010	NA		ENSBTAG00000051101	ENSBTAT00000080367			NKLS02002208.1	4142900	4143430	-1
Set_002	Gene_011	353217	SLC35B1	ENSBTAG00000006881	ENSBTAT00000080052	NM_181338	solute carrier family 35 member B1 [Source:VGNC Symbol;Acc:VGNC:34823]	19	36913633	36921556	1
Set_002	Gene_012	504741	COLEC12	ENSBTAG00000007705	ENSBTAT00000047455	NM_001101843	collectin subfamily member 12 [Source:VGNC Symbol;Acc:VGNC:27579]	24	35248809	35434069	-1
Set_002	Gene_013	540381	VPS11	ENSBTAG00000005357	ENSBTAT00000007042	NM_001076216	VPS11, CORVET/HOPS core subunit [Source:VGNC Symbol;Acc:VGNC:36809]	15	29653348	29663611	1
Set_002	Gene_014	614783	DAZAP1	ENSBTAG00000019714	ENSBTAT00000026274		DAZ associated protein 1 [Source:VGNC Symbol;Acc:VGNC:27885]	7	43824822	43843948	1
Set_002	Gene_015	535306	TSNARE1	ENSBTAG00000009974	ENSBTAT00000013156	NM_001082446	t-SNARE domain containing 1 [Source:VGNC Symbol;Acc:VGNC:36423]	14	1902552	2019963	1
Set_002	Gene_016	617781	FAM222A	ENSBTAG00000050459	ENSBTAT00000087293	NM_001206865	family with sequence similarity 222 member A [Source:NCBI gene;Acc:617781]	17	63456481	63510511	-1
Set_002	Gene_017	NA		ENSBTAG00000049055	ENSBTAT00000077526			5	66303685	66307480	1
Set_002	Gene_018	112448274	RF00026	ENSBTAG00000042261	ENSBTAT00000059253		RNA, U6 small nuclear 308, pseudogene [Source:HGNC Symbol;Acc:HGNC:47271]	1	10893790	10893893	-1
Set_002	Gene_019	531382	METTL14	ENSBTAG00000014080	ENSBTAT00000018721	NM_001083714	methyltransferase like 14 [Source:VGNC Symbol;Acc:VGNC:31404]	6	6640184	6679178	-1
Set_002	Gene_020	526525	F2RL1	ENSBTAG00000034848	ENSBTAT00000049319	NM_001046283	F2R like trypsin receptor 1 [Source:VGNC Symbol;Acc:VGNC:28684]	10	8022302	8031994	1
Set_002	Gene_021	NA		ENSBTAG00000049918	ENSBTAT00000081536			27	13932891	14019105	-1
Set_002	Gene_022	507308	PHOSPHO2	ENSBTAG00000001092	ENSBTAT00000001446	NM_001045965	phosphatase, orphan 2 [Source:VGNC Symbol;Acc:VGNC:32843]	2	26613246	26618722	-1
Set_002	Gene_023	504370	CEND1	ENSBTAG00000001228	ENSBTAT00000001623	NM_001080222	cell cycle exit and neuronal differentiation 1 [Source:VGNC Symbol;Acc:VGNC:27173]	29	50575224	50578174	1
Set_002	Gene_024	529760	ADORA2B	ENSBTAG00000007581	ENSBTAT00000009974	NM_001075925	adenosine A2b receptor [Source:VGNC Symbol;Acc:VGNC:25688]	19	33482107	33502631	-1
Set_002	Gene_025	518435	SYNJ2	ENSBTAG00000000817	ENSBTAT00000039096		synaptojanin 2 [Source:VGNC Symbol;Acc:VGNC:35528]	9	94544473	94653549	1
Set_002	Gene_026	NA	NRXN1	ENSBTAG00000024021	ENSBTAT00000061495		neurexin 1 [Source:HGNC Symbol;Acc:HGNC:8008]	11	32884867	33050686	-1
Set_002	Gene_027	112442446	RF01210	ENSBTAG00000045104	ENSBTAT00000062537			18	18522864	18522968	1
Set_002	Gene_028	537366	CDPF1	ENSBTAG00000008065	ENSBTAT00000010609	NM_001076093	cysteine rich DPF motif domain containing 1 [Source:VGNC Symbol;Acc:VGNC:27152]	5	116513986	116522344	-1
Set_002	Gene_029	100298165	OR56A5	ENSBTAG00000051243	ENSBTAT00000064464		olfactory receptor 56A4 [Source:NCBI gene;Acc:100298165]	15	47028373	47044838	1
Set_002	Gene_030	617392	OTOS	ENSBTAG00000020592	ENSBTAT00000027436	NM_001114525	otospiralin [Source:VGNC Symbol;Acc:VGNC:55642]	3	119672384	119673856	-1
Set_002	Gene_031	104970532	SERTM2	ENSBTAG00000053463	ENSBTAT00000082001	NM_001354520	serine rich and transmembrane domain containing 2 [Source:NCBI gene;Acc:104970532]	X	59711204	59722155	1
Set_002	Gene_032	768044	NUDT2	ENSBTAG00000031793	ENSBTAT00000045076	NM_001077102	nudix hydrolase 2 [Source:VGNC Symbol;Acc:VGNC:32335]	8	75723738	75735254	1
Set_002	Gene_033	509041	NAPG	ENSBTAG00000005158	ENSBTAT00000085916		NSF attachment protein gamma [Source:VGNC Symbol;Acc:VGNC:31884]	24	42177753	42190058	1
Set_002	Gene_034	282343	S100A4	ENSBTAG00000019203	ENSBTAT00000025561	NM_174595	S100 calcium binding protein A4 [Source:VGNC Symbol;Acc:VGNC:34244]	3	16824126	16826559	1
Set_002	Gene_035	512840	POU2F1	ENSBTAG00000024534	ENSBTAT00000034119	NM_001075582	POU class 2 homeobox 1 [Source:VGNC Symbol;Acc:VGNC:33174]	3	1280068	1481060	-1
Set_002	Gene_036	613696	PLEKHO2	ENSBTAG00000008411	ENSBTAT00000011069	NM_001076283	pleckstrin homology domain containing O2 [Source:NCBI gene;Acc:613696]	10	45233901	45256216	-1
Set_002	Gene_037	100337051	SLC2A9	ENSBTAG00000039197	ENSBTAT00000079223		solute carrier family 2 member 9 [Source:VGNC Symbol;Acc:VGNC:34804]	6	104996577	105216475	-1
Set_002	Gene_038	NA		ENSBTAG00000050393	ENSBTAT00000085276			17	48237530	48241659	1
Set_002	Gene_039	508356	ITIH1	ENSBTAG00000007843	ENSBTAT00000010318	NM_001075353	inter-alpha-trypsin inhibitor heavy chain 1 [Source:VGNC Symbol;Acc:VGNC:30334]	22	48099219	48113488	-1
Set_002	Gene_040	414921	CLDN4	ENSBTAG00000026278	ENSBTAT00000037275	NM_001014391	claudin 4 [Source:VGNC Symbol;Acc:VGNC:27416]	25	33477756	33479301	-1
Set_002	Gene_041	768313	SOX4	ENSBTAG00000051245	ENSBTAT00000083259	NM_001078128	SRY-box 4 [Source:NCBI gene;Acc:768313]	23	36520669	36522538	-1
Set_002	Gene_042	791004	bta-mir-106a	ENSBTAG00000029781	ENSBTAT00000042160		bta-mir-106a [Source:miRBase;Acc:MI0005005]	X	17976329	17976409	-1
Set_002	Gene_043	616841	TCF23	ENSBTAG00000054302	ENSBTAT00000082787	NM_001038216	transcription factor 23 [Source:NCBI gene;Acc:616841]	11	72478712	72485928	-1
Set_002	Gene_044	NA	RF00017	ENSBTAG00000048534	ENSBTAT00000063839			X	37818058	37818356	-1
Set_002	Gene_045	613449	DCLK1	ENSBTAG00000038495	ENSBTAT00000061628		doublecortin like kinase 1 [Source:NCBI gene;Acc:613449]	12	25608293	25689221	1
Set_002	Gene_046	100335482	BRINP2	ENSBTAG00000013715	ENSBTAT00000018227		BMP/retinoic acid inducible neural specific 2 [Source:NCBI gene;Acc:100335482]	16	58500206	58558936	1
Set_002	Gene_047	514561	UBR4	ENSBTAG00000015240	ENSBTAT00000020277	NM_001205792	ubiquitin protein ligase E3 component n-recognin 4 [Source:VGNC Symbol;Acc:VGNC:36618]	2	133452143	133589435	1
Set_002	Gene_048	NA		ENSBTAG00000002231	ENSBTAT00000048236			16	54950134	54976476	-1
Set_002	Gene_049	NA	RBM8A	ENSBTAG00000008369	ENSBTAT00000011015		RNA binding motif protein 8A [Source:VGNC Symbol;Acc:VGNC:33808]	3	21418275	21448521	1
Set_002	Gene_050	NA		ENSBTAG00000048420	ENSBTAT00000073066			18	62937680	62942083	1
Set_002	Gene_051	507677	AP1G1	ENSBTAG00000002769	ENSBTAT00000003599		adaptor related protein complex 1 subunit gamma 1 [Source:VGNC Symbol;Acc:VGNC:25977]	18	39291352	39347633	1
Set_002	Gene_052	100551513	TNFSF12	ENSBTAG00000031725	ENSBTAT00000045584	NM_001205143	TNF superfamily member 12 [Source:VGNC Symbol;Acc:VGNC:55878]	19	27283307	27291150	1
Set_002	Gene_053	517688	ORAI1	ENSBTAG00000004457	ENSBTAT00000005840	NM_001099002	ORAI calcium release-activated calcium modulator 1 [Source:VGNC Symbol;Acc:VGNC:32443]	17	53610136	53626039	-1
Set_002	Gene_054	507462	SNX16	ENSBTAG00000019639	ENSBTAT00000026163		sorting nexin 16 [Source:VGNC Symbol;Acc:VGNC:35096]	14	80762499	80798452	1
Set_002	Gene_055	511033	ACOT2	ENSBTAG00000046814	ENSBTAT00000074250	NM_001101938	acyl-CoA thioesterase 2 [Source:NCBI gene;Acc:511033]	10	84971509	84978751	1
Set_002	Gene_056	281987	PLCG1	ENSBTAG00000017584	ENSBTAT00000023383	NM_174425	phospholipase C gamma 1 [Source:VGNC Symbol;Acc:VGNC:32988]	13	69791010	69824050	1
Set_002	Gene_057	NA		ENSBTAG00000053661	ENSBTAT00000085311			13	74222899	74227610	-1
Set_002	Gene_058	512080	CDH18	ENSBTAG00000037844	ENSBTAT00000031090	NM_001076837	cadherin 18 [Source:VGNC Symbol;Acc:VGNC:27097]	20	53333437	53936986	1
Set_002	Gene_059	523153	RAPH1	ENSBTAG00000027201	ENSBTAT00000082113		Ras association (RalGDS/AF-6) and pleckstrin homology domains 1 [Source:VGNC Symbol;Acc:VGNC:54621]	2	91652748	91750016	-1
Set_002	Gene_060	NA		ENSBTAG00000043567	ENSBTAT00000060546			MT	431	1385	1
Set_002	Gene_061	522265	SLC30A1	ENSBTAG00000010909	ENSBTAT00000014489	NM_001205893	solute carrier family 30 member 1 [Source:VGNC Symbol;Acc:VGNC:34805]	16	71867070	71871370	1
Set_002	Gene_062	112442459	RF00026	ENSBTAG00000050241	ENSBTAT00000075134			18	64880429	64880535	1
Set_002	Gene_063	789054	SESTD1	ENSBTAG00000001861	ENSBTAT00000038616	NM_001191250	SEC14 and spectrin domain containing 1 [Source:VGNC Symbol;Acc:VGNC:56146]	2	17618997	17764631	1
Set_002	Gene_064	399560	MRPL12	ENSBTAG00000000417	ENSBTAT00000053193	NM_201606	mitochondrial ribosomal protein L12 [Source:NCBI gene;Acc:399560]	19	51118070	51122495	-1
Set_002	Gene_065	618409		ENSBTAG00000031214	ENSBTAT00000012124		interferon regulatory factor 4 [Source:NCBI gene;Acc:618409]	13	61382771	61393302	-1
Set_002	Gene_066	100125833	RERGL	ENSBTAG00000030493	ENSBTAT00000043032	NM_001105472	RERG like [Source:VGNC Symbol;Acc:VGNC:33874]	5	91998258	92008654	1
Set_002	Gene_067	517531	MIPEP	ENSBTAG00000008888	ENSBTAT00000011704		mitochondrial intermediate peptidase [Source:VGNC Symbol;Acc:VGNC:31483]	12	34305327	34390737	1
Set_002	Gene_068	540278	MRPL35	ENSBTAG00000004823	ENSBTAT00000006331	NM_001192391	mitochondrial ribosomal protein L35 [Source:VGNC Symbol;Acc:VGNC:31632]	11	48659309	48665790	-1
Set_002	Gene_069	540520	PGAP2	ENSBTAG00000008433	ENSBTAT00000011097	NM_001099111	post-GPI attachment to proteins 2 [Source:VGNC Symbol;Acc:VGNC:32782]	15	51243181	51264664	-1
Set_002	Gene_070	101905341	ASTE1	ENSBTAG00000007462	ENSBTAT00000031831		asteroid homolog 1 [Source:VGNC Symbol;Acc:VGNC:26225]	1	138839426	138853788	1
Set_002	Gene_071	NA	RF00001	ENSBTAG00000046179	ENSBTAT00000064482			25	31082281	31082402	-1
Set_002	Gene_072	NA		ENSBTAG00000049057	ENSBTAT00000081466			16	30393168	30400840	1
Set_002	Gene_073	507013	FAM91A1	ENSBTAG00000005025	ENSBTAT00000006615		family with sequence similarity 91 member A1 [Source:VGNC Symbol;Acc:VGNC:53863]	14	16074868	16112829	-1
Set_002	Gene_074	781252	LIG4	ENSBTAG00000015868	ENSBTAT00000021092	NM_001191126	DNA ligase 4 [Source:VGNC Symbol;Acc:VGNC:30884]	12	83594754	83602827	-1
Set_002	Gene_075	100526412	bta-mir-3431	ENSBTAG00000048241	ENSBTAT00000066255		bta-mir-3431 [Source:miRBase;Acc:MI0014498]	X	34445007	34445103	-1
Set_002	Gene_076	514889	IFNGR2	ENSBTAG00000012899	ENSBTAT00000017147		interferon gamma receptor 2 [Source:VGNC Symbol;Acc:VGNC:30059]	1	2098968	2124278	-1
Set_002	Gene_077	280706	TG	ENSBTAG00000007823	ENSBTAT00000078788	NM_173883	thyroglobulin [Source:VGNC Symbol;Acc:VGNC:35798]	14	8217490	8453614	-1
Set_002	Gene_078	317651	CATHL6	ENSBTAG00000049629	ENSBTAT00000083146	NM_174832	cathelicidin 6 [Source:NCBI gene;Acc:317651]	22	51662801	51665452	-1
Set_002	Gene_079	100337491	LYPD6	ENSBTAG00000047426	ENSBTAT00000064259		LY6/PLAUR domain containing 6 [Source:VGNC Symbol;Acc:VGNC:31103]	2	46624526	46753941	-1
Set_002	Gene_080	789817		ENSBTAG00000052864	ENSBTAT00000073666		olfactory receptor 13C2 [Source:NCBI gene;Acc:789817]	8	94165513	94166469	-1
Set_002	Gene_081	NA		ENSBTAG00000049559	ENSBTAT00000085773			NKLS02000467.1	16755	17558	-1
Set_002	Gene_082	538173	PGP	ENSBTAG00000009951	ENSBTAT00000013127	NM_001038172	phosphoglycolate phosphatase [Source:VGNC Symbol;Acc:VGNC:32798]	25	1742546	1745400	-1
Set_002	Gene_083	NA		ENSBTAG00000054132	ENSBTAT00000077054			4	14463630	14466823	-1
Set_002	Gene_084	510458	SUSD2	ENSBTAG00000006730	ENSBTAT00000029404	NM_001205675	sushi domain containing 2 [Source:VGNC Symbol;Acc:VGNC:35487]	17	71426379	71433950	1
Set_002	Gene_085	524761	CD300E	ENSBTAG00000053365	ENSBTAT00000070885		CD300e molecule [Source:NCBI gene;Acc:524761]	19	56769589	56781204	1
Set_002	Gene_086	112447660	RF00026	ENSBTAG00000054215	ENSBTAT00000072036			7	38537630	38537736	1
Set_002	Gene_087	510620	ASAH1	ENSBTAG00000011257	ENSBTAT00000014960	NM_001075459	N-acylsphingosine amidohydrolase 1 [Source:VGNC Symbol;Acc:VGNC:26183]	27	19211654	19243281	1
Set_002	Gene_088	281088	COMP	ENSBTAG00000004630	ENSBTAT00000006074	NM_001166517	cartilage oligomeric matrix protein [Source:VGNC Symbol;Acc:VGNC:27590]	7	4422721	4430541	1
Set_002	Gene_089	112446673		ENSBTAG00000054816	ENSBTAT00000075556		keratin, type II cuticular Hb1-like [Source:NCBI gene;Acc:112446673]	5	27639400	27644675	-1
Set_002	Gene_090	NA		ENSBTAG00000017233	ENSBTAT00000087137			19	52337266	52363244	-1
Set_002	Gene_091	616003	TM6SF1	ENSBTAG00000012926	ENSBTAT00000017175	NM_001102295	transmembrane 6 superfamily member 1 [Source:VGNC Symbol;Acc:VGNC:35908]	21	24921877	24951743	-1
Set_002	Gene_092	100313114	bta-mir-2284i	ENSBTAG00000044299	ENSBTAT00000061732		bta-mir-2284i [Source:miRBase;Acc:MI0011294]	1	4288068	4288144	1
Set_002	Gene_093	534852	FBXO4	ENSBTAG00000016981	ENSBTAT00000022583	NM_001034617	F-box protein 4 [Source:VGNC Symbol;Acc:VGNC:28910]	20	32589453	32602498	-1
Set_002	Gene_094	NA		ENSBTAG00000053328	ENSBTAT00000080200			4	42292576	42293599	1
Set_002	Gene_095	NA		ENSBTAG00000050717	ENSBTAT00000085006			28	17754428	17757558	1
Set_002	Gene_096	528871	GZMK	ENSBTAG00000005164	ENSBTAT00000006807	NM_001205959	granzyme K [Source:VGNC Symbol;Acc:VGNC:29733]	20	24073111	24083959	-1
Set_002	Gene_097	NA		ENSBTAG00000049966	ENSBTAT00000066643			23	44468103	44517625	-1
Set_002	Gene_098	NA		ENSBTAG00000055223	ENSBTAT00000075378			5	25953273	25957203	1
Set_002	Gene_099	NA		ENSBTAG00000053230	ENSBTAT00000082248			25	22758640	22762868	-1
Set_002	Gene_100	NA		ENSBTAG00000030490	ENSBTAT00000009737			X	102727884	102728396	1
Set_002	Gene_101	NA		ENSBTAG00000049328	ENSBTAT00000069458			13	60849068	60860265	1
Set_002	Gene_102	100336921		ENSBTAG00000048640	ENSBTAT00000066908		olfactory receptor 4A47 [Source:NCBI gene;Acc:100336921]	15	78211765	78212694	1
Set_002	Gene_103	788790		ENSBTAG00000051874	ENSBTAT00000080380		olfactory receptor 4F3/4F16/4F29 [Source:NCBI gene;Acc:788790]	10	28085994	28086935	-1
Set_002	Gene_104	539429	GALR1	ENSBTAG00000021003	ENSBTAT00000027969	NM_001192241	galanin receptor 1 [Source:VGNC Symbol;Acc:VGNC:29239]	24	2145784	2156850	-1
Set_002	Gene_105	NA	RF02115	ENSBTAG00000050246	ENSBTAT00000069010			6	36033564	36033676	-1
Set_002	Gene_106	281308	MMP1	ENSBTAG00000048029	ENSBTAT00000021014	NM_174112	matrix metallopeptidase 1 (interstitial collagenase) [Source:NCBI gene;Acc:281308]	15	5811583	5820952	1
Set_002	Gene_107	101904667	ATP6V0C	ENSBTAG00000026428	ENSBTAT00000037556		ATPase H+ transporting V0 subunit c [Source:VGNC Symbol;Acc:VGNC:26311]	8	17434137	17435288	-1
Set_002	Gene_108	NA		ENSBTAG00000049352	ENSBTAT00000081740			23	29222731	29226003	-1
Set_002	Gene_109	112442796	RF00156	ENSBTAG00000042105	ENSBTAT00000059097			19	18413980	18414114	1
Set_002	Gene_110	526135	RBMS1	ENSBTAG00000005180	ENSBTAT00000006826	NM_001035361	RNA binding motif single stranded interacting protein 1 [Source:VGNC Symbol;Acc:VGNC:33809]	2	35855477	36075061	1
Set_002	Gene_111	112449179	RF00003	ENSBTAG00000029683	ENSBTAT00000042062			12	4081594	4081760	1
Set_002	Gene_112	767841	ARMCX2	ENSBTAG00000019417	ENSBTAT00000025866	NM_001076960	armadillo repeat containing X-linked 2 [Source:VGNC Symbol;Acc:VGNC:50545]	X	50590161	50594596	1
Set_002	Gene_113	NA		ENSBTAG00000053326	ENSBTAT00000084824			27	6610757	6610927	1
Set_002	Gene_114	540762	NCOA5	ENSBTAG00000014186	ENSBTAT00000018862		nuclear receptor coactivator 5 [Source:VGNC Symbol;Acc:VGNC:31923]	13	74797673	74824936	-1
Set_002	Gene_115	515729	FUCA2	ENSBTAG00000001752	ENSBTAT00000002297	NM_001205818	alpha-L-fucosidase 2 [Source:VGNC Symbol;Acc:VGNC:29141]	9	80952916	80972653	-1
Set_002	Gene_116	505250		ENSBTAG00000038670	ENSBTAT00000055858		olfactory receptor, family 8, subfamily S, member 1 [Source:NCBI gene;Acc:505250]	5	31462475	31463413	-1
Set_002	Gene_117	NA		ENSBTAG00000048497	ENSBTAT00000071140			1	73253996	73257620	1
Set_002	Gene_118	NA		ENSBTAG00000049836	ENSBTAT00000084572			12	71200007	71200438	1
Set_002	Gene_119	NA		ENSBTAG00000048349	ENSBTAT00000071593			24	21172635	21199207	1
Set_002	Gene_120	112445296	RF00026	ENSBTAG00000054420	ENSBTAT00000064191		RNA, U6 small nuclear 11, pseudogene [Source:HGNC Symbol;Acc:HGNC:34255]	X	28420608	28420714	-1
Set_002	Gene_121	NA		ENSBTAG00000052438	ENSBTAT00000070557			11	93718419	93718688	1
Set_002	Gene_122	536048	MAK	ENSBTAG00000014053	ENSBTAT00000078067		male germ cell associated kinase [Source:VGNC Symbol;Acc:VGNC:31152]	23	45349611	45399368	1
Set_002	Gene_123	784986	UBE2U	ENSBTAG00000040268	ENSBTAT00000054674	NM_001099193	ubiquitin conjugating enzyme E2 U [Source:VGNC Symbol;Acc:VGNC:53642]	3	81244951	81315175	-1
Set_002	Gene_124	516393		ENSBTAG00000007736	ENSBTAT00000037345		otoconin 90 [Source:NCBI gene;Acc:516393]	14	9074043	9111806	1
Set_002	Gene_125	282089	TGFB1	ENSBTAG00000020457	ENSBTAT00000075874		transforming growth factor beta 1 [Source:VGNC Symbol;Acc:VGNC:35800]	18	50484512	50508692	-1
Set_002	Gene_126	NA	FAM237B	ENSBTAG00000052637	ENSBTAT00000068131		family with sequence similarity 237 member B [Source:HGNC Symbol;Acc:HGNC:53217]	4	74512360	74512770	-1
Set_002	Gene_127	282307	PIK3R1	ENSBTAG00000010989	ENSBTAT00000014594	NM_174575	phosphoinositide-3-kinase regulatory subunit 1 [Source:VGNC Symbol;Acc:VGNC:32894]	20	11397628	11480087	-1
Set_002	Gene_128	515511	TSEN2	ENSBTAG00000037980	ENSBTAT00000076898		tRNA splicing endonuclease subunit 2 [Source:NCBI gene;Acc:515511]	22	56617910	56661729	-1
Set_002	Gene_129	NA		ENSBTAG00000003656	ENSBTAT00000004764			9	27620352	27621474	-1
Set_002	Gene_130	NA		ENSBTAG00000052972	ENSBTAT00000072045			10	5474695	5480939	-1
Set_002	Gene_131	532997	KDM1A	ENSBTAG00000009500	ENSBTAT00000012501		lysine demethylase 1A [Source:VGNC Symbol;Acc:VGNC:30522]	2	129770258	129836290	-1
Set_002	Gene_132	508840	FNDC3A	ENSBTAG00000020681	ENSBTAT00000071650	NM_001205646	fibronectin type III domain containing 3A [Source:VGNC Symbol;Acc:VGNC:29062]	12	18729068	18840733	1
Set_002	Gene_133	112442857	RF00004	ENSBTAG00000049357	ENSBTAT00000066887			19	43263952	43264143	-1
Set_002	Gene_134	539901	RNF40	ENSBTAG00000003421	ENSBTAT00000004443	NM_001206452	ring finger protein 40 [Source:VGNC Symbol;Acc:VGNC:34066]	25	26883214	26894901	1
Set_002	Gene_135	NA	THAP11	ENSBTAG00000006411	ENSBTAT00000008406		THAP domain containing 11 [Source:VGNC Symbol;Acc:VGNC:35819]	18	35349992	35353414	1
Set_002	Gene_136	101904044		ENSBTAG00000052075	ENSBTAT00000070066		odorant-binding protein-like [Source:NCBI gene;Acc:101904044]	X	137397672	137407671	-1
Set_002	Gene_137	NA		ENSBTAG00000038755	ENSBTAT00000056450			18	60530988	60608616	-1
Set_002	Gene_138	785875		ENSBTAG00000049354	ENSBTAT00000072115		olfactory receptor 5K3-like [Source:NCBI gene;Acc:785875]	1	42711857	42712786	1
Set_002	Gene_139	NA		ENSBTAG00000050449	ENSBTAT00000056672			2	131917999	131926235	1
Set_002	Gene_140	533510	KLHL24	ENSBTAG00000017450	ENSBTAT00000023192	NM_001206196	kelch like family member 24 [Source:VGNC Symbol;Acc:VGNC:30652]	1	83449266	83481681	-1
Set_002	Gene_141	NA		ENSBTAG00000051876	ENSBTAT00000081182			28	13180211	13181848	1
Set_002	Gene_142	NA	ZNF484	ENSBTAG00000031682	ENSBTAT00000013807		zinc finger protein 484 [Source:VGNC Symbol;Acc:VGNC:37285]	8	83792462	83801382	-1
Set_002	Gene_143	NA		ENSBTAG00000054968	ENSBTAT00000078754			18	48688838	48689017	-1
Set_002	Gene_144	NA	CFAP221	ENSBTAG00000009057	ENSBTAT00000011930		cilia and flagella associated protein 221 [Source:VGNC Symbol;Acc:VGNC:27241]	2	71437172	71470213	1
Set_002	Gene_145	100125949		ENSBTAG00000037410	ENSBTAT00000054070	NM_001105512	uncharacterized LOC100125949 [Source:NCBI gene;Acc:100125949]	22	49048876	49052860	-1
Set_002	Gene_146	505358	BRD2	ENSBTAG00000011074	ENSBTAT00000014704	NM_001045866	bromodomain containing 2 [Source:VGNC Symbol;Acc:VGNC:26557]	23	7286988	7294770	1
Set_002	Gene_147	112442138	RF00026	ENSBTAG00000044838	ENSBTAT00000062271			17	47156870	47156975	-1
Set_002	Gene_148	NA		ENSBTAG00000051180	ENSBTAT00000078963			X	60140334	60143894	1
Set_002	Gene_149	613942	CHODL	ENSBTAG00000000588	ENSBTAT00000000782	NM_001101228	chondrolectin [Source:VGNC Symbol;Acc:VGNC:27308]	1	18712589	18736860	-1
Set_002	Gene_150	100313432	bta-mir-2284m	ENSBTAG00000045470	ENSBTAT00000062903		bta-mir-2284m [Source:miRBase;Acc:MI0011459]	2	117477328	117477394	-1
Set_002	Gene_151	537790	PIK3C2A	ENSBTAG00000004901	ENSBTAT00000046627		phosphatidylinositol-4-phosphate 3-kinase catalytic subunit type 2 alpha [Source:NCBI gene;Acc:537790]	15	35295398	35400621	1
Set_002	Gene_152	112447625	RF00619	ENSBTAG00000042477	ENSBTAT00000059469			7	6786055	6786180	1
Set_002	Gene_153	282229	FCGR2B	ENSBTAG00000021842	ENSBTAT00000029116		Fc fragment of IgG receptor IIb [Source:NCBI gene;Acc:282229]	3	7931201	7947765	-1
Set_002	Gene_154	100140532	ANKRD63	ENSBTAG00000046052	ENSBTAT00000064185		ankyrin repeat domain 63 [Source:VGNC Symbol;Acc:VGNC:25940]	10	35899557	35900705	-1
Set_002	Gene_155	NA		ENSBTAG00000048546	ENSBTAT00000073293			3	28230735	28238668	-1
Set_002	Gene_156	NA	bta-mir-2285bj-1	ENSBTAG00000050820	ENSBTAT00000062516		bta-mir-2285bj-1 [Source:miRBase;Acc:MI0038215]	X	6939383	6939441	-1
Set_002	Gene_157	530618	SPOP	ENSBTAG00000005824	ENSBTAT00000007660	NM_001075936	speckle type BTB/POZ protein [Source:VGNC Symbol;Acc:VGNC:35229]	19	36937900	37020386	1
Set_002	Gene_158	525820		ENSBTAG00000015987	ENSBTAT00000021266		cationic amino acid transporter 3 [Source:NCBI gene;Acc:525820]	18	61322356	61333880	1
Set_002	Gene_159	100313226	bta-mir-2453	ENSBTAG00000044374	ENSBTAT00000061807		bta-mir-2453 [Source:miRBase;Acc:MI0011510]	6	113521279	113521357	1
Set_002	Gene_160	540040	ARL3	ENSBTAG00000004318	ENSBTAT00000005655	NM_001038567	ADP ribosylation factor like GTPase 3 [Source:VGNC Symbol;Acc:VGNC:26143]	26	23292989	23317114	-1
Set_002	Gene_161	NA		ENSBTAG00000052368	ENSBTAT00000072346			29	50045925	50047577	-1
Set_002	Gene_162	616482	CAPS	ENSBTAG00000006069	ENSBTAT00000007972	NM_001076424	calcyphosine [Source:VGNC Symbol;Acc:VGNC:26753]	7	18466099	18467633	-1
Set_002	Gene_163	112447664	RF00026	ENSBTAG00000049249	ENSBTAT00000059509			7	22356381	22356487	-1
Set_002	Gene_164	112444557	RF00283	ENSBTAG00000044887	ENSBTAT00000062320			26	20886795	20886877	1
Set_002	Gene_165	NA	RF00019	ENSBTAG00000042817	ENSBTAT00000059809			4	102386012	102386108	-1
Set_002	Gene_166	515653	SGSM1	ENSBTAG00000006592	ENSBTAT00000068842		small G protein signaling modulator 1 [Source:VGNC Symbol;Acc:VGNC:34550]	17	65010788	65083923	1
Set_002	Gene_167	NA		ENSBTAG00000050088	ENSBTAT00000072091			21	380523	381656	1
Set_002	Gene_168	280686	F3	ENSBTAG00000007101	ENSBTAT00000009341	NM_173878	coagulation factor III, tissue factor [Source:VGNC Symbol;Acc:VGNC:28687]	3	48954585	48965477	1
Set_002	Gene_169	NA		ENSBTAG00000008020	ENSBTAT00000010543			5	65308669	65308998	1
Set_002	Gene_170	NA		ENSBTAG00000049556	ENSBTAT00000087242			18	65579823	65599864	1
Set_002	Gene_171	767976	AMN	ENSBTAG00000015750	ENSBTAT00000020912	NM_001077041	amnion associated transmembrane protein [Source:VGNC Symbol;Acc:VGNC:25869]	21	67610926	67621574	1
Set_002	Gene_172	NA		ENSBTAG00000053965	ENSBTAT00000082849			7	62718791	62720023	1
Set_002	Gene_173	NA		ENSBTAG00000050679	ENSBTAT00000069743			3	19404328	19406870	-1
Set_002	Gene_174	NA		ENSBTAG00000051591	ENSBTAT00000075966			15	72569685	72570340	1
Set_002	Gene_175	519616		ENSBTAG00000037928	ENSBTAT00000057294		olfactory receptor 1009 [Source:NCBI gene;Acc:519616]	15	79993369	79995158	-1
Set_002	Gene_176	508292	IL34	ENSBTAG00000009357	ENSBTAT00000076664		interleukin 34 [Source:VGNC Symbol;Acc:VGNC:30156]	18	1510170	1570878	-1
Set_002	Gene_177	506723	TMEM132E	ENSBTAG00000002680	ENSBTAT00000083221		transmembrane protein 132E [Source:VGNC Symbol;Acc:VGNC:35968]	19	15463728	15480095	-1
Set_002	Gene_178	NA	RF00001	ENSBTAG00000045468	ENSBTAT00000062901			7	5844183	5844316	-1
Set_002	Gene_179	532761	OVOL2	ENSBTAG00000008410	ENSBTAT00000011067	NM_001206007	ovo like zinc finger 2 [Source:VGNC Symbol;Acc:VGNC:32506]	13	38271785	38300529	-1
Set_002	Gene_180	515550	GRIPAP1	ENSBTAG00000007788	ENSBTAT00000082850		GRIP1 associated protein 1 [Source:VGNC Symbol;Acc:VGNC:29653]	X	87078387	87100538	-1
Set_002	Gene_181	768074	ETFDH	ENSBTAG00000016679	ENSBTAT00000067848		electron transfer flavoprotein dehydrogenase [Source:VGNC Symbol;Acc:VGNC:28621]	17	40285083	40337562	-1
Set_002	Gene_182	525346	NCOA1	ENSBTAG00000015007	ENSBTAT00000064008	NM_001206215	nuclear receptor coactivator 1 [Source:NCBI gene;Acc:525346]	11	74447679	74612645	-1
Set_002	Gene_183	504438	SSR4	ENSBTAG00000021421	ENSBTAT00000028556	NM_001038503	signal sequence receptor subunit 4 [Source:VGNC Symbol;Acc:VGNC:35322]	X	37011768	37015522	1
Set_002	Gene_184	112441720	RF00334	ENSBTAG00000042449	ENSBTAT00000059441			15	39162055	39162184	1
Set_002	Gene_185	514932	SNRPD2	ENSBTAG00000012177	ENSBTAT00000016153	NM_001034476	small nuclear ribonucleoprotein D2 polypeptide [Source:VGNC Symbol;Acc:VGNC:35079]	18	53253415	53257036	-1
Set_002	Gene_186	523062	OR4Q2	ENSBTAG00000022915	ENSBTAT00000006327		olfactory receptor 4Q2 [Source:NCBI gene;Acc:523062]	10	27392208	27393149	1
Set_002	Gene_187	NA	RF00017	ENSBTAG00000046888	ENSBTAT00000063624			6	30244484	30244750	1
Set_002	Gene_188	100125276	GNG4	ENSBTAG00000002908	ENSBTAT00000003777	NM_001103324	G protein subunit gamma 4 [Source:VGNC Symbol;Acc:VGNC:29467]	28	8295602	8364199	-1
Set_002	Gene_189	618124		ENSBTAG00000054200	ENSBTAT00000064410	NM_001206664	olfactory receptor, family 1, subfamily E, member 2-like [Source:NCBI gene;Acc:618124]	19	24139174	24140118	-1
Set_002	Gene_190	112445226	RF00026	ENSBTAG00000050545	ENSBTAT00000059972			X	135376503	135376609	1
Set_002	Gene_191	539518	CD180	ENSBTAG00000006360	ENSBTAT00000008348	NM_001076168	CD180 molecule [Source:VGNC Symbol;Acc:VGNC:52748]	20	12417798	12432414	1
Set_002	Gene_192	504261	CAD	ENSBTAG00000017894	ENSBTAT00000023783	NM_001191393	carbamoyl-phosphate synthetase 2, aspartate transcarbamylase, and dihydroorotase [Source:NCBI gene;Acc:504261]	11	72393099	72414662	-1
Set_002	Gene_193	540340	SYNPO2	ENSBTAG00000006434	ENSBTAT00000008434	NM_001083751	synaptopodin 2 [Source:VGNC Symbol;Acc:VGNC:35531]	6	6233764	6435034	-1
Set_002	Gene_194	783379	WASHC4	ENSBTAG00000033735	ENSBTAT00000047810		WASH complex subunit 4 [Source:VGNC Symbol;Acc:VGNC:36868]	5	68640524	68696996	1
Set_002	Gene_195	782075	IL26	ENSBTAG00000052655	ENSBTAT00000078804	NM_001205424	interleukin 26 [Source:NCBI gene;Acc:782075]	5	45548436	45562759	1
Set_002	Gene_196	112441692	RF00026	ENSBTAG00000053148	ENSBTAT00000065557			15	17730929	17731035	1
Set_002	Gene_197	511234	NOSIP	ENSBTAG00000014450	ENSBTAT00000019215	NM_001075502	nitric oxide synthase interacting protein [Source:VGNC Symbol;Acc:VGNC:32175]	18	55990005	56002003	-1
Set_002	Gene_198	112442097	RF00614	ENSBTAG00000042522	ENSBTAT00000059514			17	34697409	34697537	-1
Set_002	Gene_199	540672	CDH12	ENSBTAG00000025893	ENSBTAT00000081096		cadherin 12 [Source:VGNC Symbol;Acc:VGNC:54415]	20	51049217	51567420	1
Set_002	Gene_200	444866	ZNF470	ENSBTAG00000046101	ENSBTAT00000064558	NM_001206754	zinc finger protein 470 [Source:NCBI gene;Acc:444866]	18	63864852	63872963	-1
Set_002	Gene_201	536067	TAF15	ENSBTAG00000006916	ENSBTAT00000009084		TATA-box binding protein associated factor 15 [Source:VGNC Symbol;Acc:VGNC:54497]	19	14543295	14573019	-1
Set_002	Gene_202	781037	MAP3K10	ENSBTAG00000017618	ENSBTAT00000047929		mitogen-activated protein kinase kinase kinase 10 [Source:VGNC Symbol;Acc:VGNC:57052]	18	49596994	49612307	1
Set_002	Gene_203	281968	PCSK2	ENSBTAG00000008687	ENSBTAT00000011451	NM_174413	proprotein convertase subtilisin/kexin type 2 [Source:VGNC Symbol;Acc:VGNC:32648]	13	37505784	37745694	1
Set_002	Gene_204	NA	RF00001	ENSBTAG00000036744	ENSBTAT00000051244			15	17983260	17983376	1
Set_002	Gene_205	504647	RAD9A	ENSBTAG00000012141	ENSBTAT00000044769		RAD9 checkpoint clamp component A [Source:VGNC Symbol;Acc:VGNC:33689]	29	45286731	45292816	1
Set_002	Gene_206	NA	RF01879	ENSBTAG00000048715	ENSBTAT00000070540			1	61466587	61466751	1
Set_002	Gene_207	NA	RF00001	ENSBTAG00000050152	ENSBTAT00000050980		RNA, 5S ribosomal 9 [Source:HGNC Symbol;Acc:HGNC:34370]	5	19619877	19619994	1
Set_002	Gene_208	514627	SPAG8	ENSBTAG00000011442	ENSBTAT00000015206	NM_001102005	sperm associated antigen 8 [Source:VGNC Symbol;Acc:VGNC:35169]	8	59974305	59977270	-1
Set_002	Gene_209	539570	SIK2	ENSBTAG00000020272	ENSBTAT00000068022		salt inducible kinase 2 [Source:VGNC Symbol;Acc:VGNC:50078]	15	21927820	22054213	1
Set_002	Gene_210	NA		ENSBTAG00000048684	ENSBTAT00000072134			21	5690066	5695014	-1
Set_002	Gene_211	NA	RF00019	ENSBTAG00000043461	ENSBTAT00000060453			4	112179860	112179961	1
Set_002	Gene_212	515858	CAAP1	ENSBTAG00000001223	ENSBTAT00000001617	NM_001038120	caspase activity and apoptosis inhibitor 1 [Source:VGNC Symbol;Acc:VGNC:26660]	8	17332181	17403912	1
Set_002	Gene_213	538949	ESCO2	ENSBTAG00000006551	ENSBTAT00000008606	NM_001101182	establishment of sister chromatid cohesion N-acetyltransferase 2 [Source:NCBI gene;Acc:538949]	8	10992674	11019066	-1
Set_002	Gene_214	112443564	RF00574	ENSBTAG00000043140	ENSBTAT00000060132		small nucleolar RNA, C/D box 69 [Source:HGNC Symbol;Acc:HGNC:32730]	22	48171158	48171234	-1
Set_002	Gene_215	NA		ENSBTAG00000052774	ENSBTAT00000072832			26	2116298	2118595	1
Set_002	Gene_216	783763	LHX2	ENSBTAG00000010990	ENSBTAT00000014582	NM_001191175	LIM homeobox 2 [Source:VGNC Symbol;Acc:VGNC:30872]	11	95125097	95144837	1
Set_002	Gene_217	614655	DESI1	ENSBTAG00000047942	ENSBTAT00000063207		desumoylating isopeptidase 1 [Source:VGNC Symbol;Acc:VGNC:28014]	5	112687401	112706629	-1
Set_002	Gene_218	781239	PLCXD3	ENSBTAG00000010822	ENSBTAT00000014357	NM_001103304	phosphatidylinositol specific phospholipase C X domain containing 3 [Source:VGNC Symbol;Acc:VGNC:32994]	20	33016045	33218726	1
Set_002	Gene_219	NA		ENSBTAG00000040367	ENSBTAT00000044482			2	92575447	92576061	-1
Set_002	Gene_220	539643	VCPIP1	ENSBTAG00000006695	ENSBTAT00000008802		valosin containing protein interacting protein 1 [Source:VGNC Symbol;Acc:VGNC:53883]	14	30874819	30899394	-1
Set_002	Gene_221	520410	LRRC10B	ENSBTAG00000047786	ENSBTAT00000065621	NM_001204828	leucine rich repeat containing 10B [Source:VGNC Symbol;Acc:VGNC:52797]	29	39978830	39980989	1
Set_002	Gene_222	616245	DMRT1	ENSBTAG00000033352	ENSBTAT00000023667	NM_001078060	doublesex and mab-3 related transcription factor 1 [Source:VGNC Symbol;Acc:VGNC:28110]	8	43600804	43697170	-1
Set_002	Gene_223	NA		ENSBTAG00000055004	ENSBTAT00000068770			17	39268470	39268712	-1
Set_002	Gene_224	NA		ENSBTAG00000050240	ENSBTAT00000079440			18	29308431	29311154	-1
Set_002	Gene_225	NA		ENSBTAG00000048700	ENSBTAT00000082316			12	36011639	36021191	-1
Set_002	Gene_226	515957	HIST1H1E	ENSBTAG00000031774	ENSBTAT00000002124	NM_001098989	histone cluster 1, H1e [Source:NCBI gene;Acc:515957]	23	31770009	31771607	-1
Set_002	Gene_227	526950	UBL3	ENSBTAG00000012170	ENSBTAT00000035753	NM_001038144	ubiquitin like 3 [Source:VGNC Symbol;Acc:VGNC:36607]	12	30806229	30854060	1
Set_002	Gene_228	NA		ENSBTAG00000049674	ENSBTAT00000082945			21	45986113	45986743	1
Set_002	Gene_229	534910	CD200	ENSBTAG00000033319	ENSBTAT00000027169	NM_001034620	CD200 molecule [Source:VGNC Symbol;Acc:VGNC:27010]	1	57126575	57147988	1
Set_002	Gene_230	523107	RASGEF1C	ENSBTAG00000055156	ENSBTAT00000071554	NM_001103259	RasGEF domain family member 1C [Source:NCBI gene;Acc:523107]	7	1004381	1109792	1
Set_002	Gene_231	NA		ENSBTAG00000051043	ENSBTAT00000080521			15	24246354	24250073	-1
Set_002	Gene_232	281897	LAMP1	ENSBTAG00000010242	ENSBTAT00000045121	NM_001075124	lysosomal associated membrane protein 1 [Source:VGNC Symbol;Acc:VGNC:30775]	12	86593182	86605278	1
Set_002	Gene_233	445422	VKORC1	ENSBTAG00000000405	ENSBTAT00000000519	NM_001003903	vitamin K epoxide reductase complex subunit 1 [Source:NCBI gene;Acc:445422]	25	27201063	27204251	-1
Set_002	Gene_234	NA		ENSBTAG00000048897	ENSBTAT00000075990			NKLS02000809.1	91509	95000	1
Set_002	Gene_235	615668	CCDC117	ENSBTAG00000003557	ENSBTAT00000073083	NM_001278653	coiled-coil domain containing 117 [Source:VGNC Symbol;Acc:VGNC:26837]	17	68029981	68049495	1
Set_002	Gene_236	785141	KIAA1614	ENSBTAG00000006260	ENSBTAT00000067342		KIAA1614 [Source:VGNC Symbol;Acc:VGNC:30573]	16	62043278	62080970	1
Set_002	Gene_237	525335		ENSBTAG00000051479	ENSBTAT00000081716		glutaminase [Source:NCBI gene;Acc:525335]	2	79465117	79512607	1
Set_002	Gene_238	506916	NUP54	ENSBTAG00000010955	ENSBTAT00000014548	NM_001075285	nucleoporin 54 [Source:NCBI gene;Acc:506916]	6	91010248	91043062	-1
Set_002	Gene_239	NA		ENSBTAG00000053653	ENSBTAT00000085257			NKLS02000657.1	72994	74472	-1
Set_002	Gene_240	512427	NASP	ENSBTAG00000015346	ENSBTAT00000078061		nuclear autoantigenic sperm protein [Source:VGNC Symbol;Acc:VGNC:31887]	3	100461046	100505190	-1
Set_002	Gene_241	338045	SQSTM1	ENSBTAG00000015591	ENSBTAT00000075019		sequestosome 1 [Source:VGNC Symbol;Acc:VGNC:35265]	7	1433632	1508188	-1
Set_002	Gene_242	282714	MYH7	ENSBTAG00000009703	ENSBTAT00000061306	NM_174727	myosin heavy chain 7 [Source:NCBI gene;Acc:282714]	10	21490410	21510517	1
Set_002	Gene_243	NA		ENSBTAG00000051635	ENSBTAT00000081270			6	110818025	110843467	-1
Set_002	Gene_244	523070	WBP2NL	ENSBTAG00000013174	ENSBTAT00000017533	NM_001082441	WBP2 N-terminal like [Source:VGNC Symbol;Acc:VGNC:36873]	5	112982148	113011836	1
Set_002	Gene_245	NA		ENSBTAG00000054602	ENSBTAT00000070095			22	50335610	50335875	-1
Set_002	Gene_246	533284	RAB3IP	ENSBTAG00000031950	ENSBTAT00000022990	NM_001046347	RAB3A interacting protein [Source:VGNC Symbol;Acc:VGNC:56227]	5	43657005	43713702	-1
Set_002	Gene_247	617701	BDNF	ENSBTAG00000008134	ENSBTAT00000010694	NM_001046607	brain derived neurotrophic factor [Source:VGNC Symbol;Acc:VGNC:26461]	15	58385523	58422131	-1
Set_002	Gene_248	NA		ENSBTAG00000048502	ENSBTAT00000081872			9	99054550	99081437	1
Set_002	Gene_249	497621	SLCO4C1	ENSBTAG00000016359	ENSBTAT00000021761	NM_001192846	solute carrier organic anion transporter family member 4C1 [Source:VGNC Symbol;Acc:VGNC:34955]	7	101269347	101354602	-1
Set_002	Gene_250	539742	PAK4	ENSBTAG00000013958	ENSBTAT00000086158	NM_001076184	p21 (RAC1) activated kinase 4 [Source:NCBI gene;Acc:539742]	18	48852699	48900413	1
Set_003	Gene_001	514111	ARMC6	ENSBTAG00000013291	ENSBTAT00000017674	NM_001098966	armadillo repeat containing 6 [Source:VGNC Symbol;Acc:VGNC:26160]	7	4167879	4183780	-1
Set_003	Gene_002	112446120	RF00494	ENSBTAG00000042358	ENSBTAT00000059350			3	99486271	99486350	1
Set_003	Gene_003	NA		ENSBTAG00000048663	ENSBTAT00000080013			7	13697483	13698416	1
Set_003	Gene_004	537938	CPPED1	ENSBTAG00000007142	ENSBTAT00000067144		calcineurin like phosphoesterase domain containing 1 [Source:NCBI gene;Acc:537938]	25	11393983	11531543	-1
Set_003	Gene_005	509977	ARL6IP5	ENSBTAG00000021506	ENSBTAT00000028661	NM_001014891	ADP ribosylation factor like GTPase 6 interacting protein 5 [Source:VGNC Symbol;Acc:VGNC:26151]	22	32436509	32457970	-1
Set_003	Gene_006	514305	TMEM141	ENSBTAG00000013889	ENSBTAT00000085364		transmembrane protein 141 [Source:VGNC Symbol;Acc:VGNC:35974]	11	105895673	105897519	1
Set_003	Gene_007	317660	HOXC6	ENSBTAG00000009238	ENSBTAT00000075152		homeobox C6 [Source:VGNC Symbol;Acc:VGNC:29926]	5	26002104	26016051	-1
Set_003	Gene_008	281985	PLCB4	ENSBTAG00000013116	ENSBTAT00000017447	NM_001166510	phospholipase C beta 4 [Source:VGNC Symbol;Acc:VGNC:32983]	13	2304288	2503503	1
Set_003	Gene_009	NA		ENSBTAG00000049725	ENSBTAT00000078074			10	45563494	45569995	1
Set_003	Gene_010	107131321	ZNF358	ENSBTAG00000046837	ENSBTAT00000066296		zinc finger protein 358 [Source:VGNC Symbol;Acc:VGNC:37257]	7	16386268	16388881	1
Set_003	Gene_011	NA		ENSBTAG00000047632	ENSBTAT00000065204			20	71944313	71950871	1
Set_003	Gene_012	NA	RF00026	ENSBTAG00000042783	ENSBTAT00000059775			24	42483925	42484024	-1
Set_003	Gene_013	NA		ENSBTAG00000040255	ENSBTAT00000066229			X	49736706	49737317	-1
Set_003	Gene_014	788754	SMCO1	ENSBTAG00000013319	ENSBTAT00000017713	NM_001099209	single-pass membrane protein with coiled-coil domains 1 [Source:VGNC Symbol;Acc:VGNC:35005]	1	71044905	71052495	-1
Set_003	Gene_015	514487	STX19	ENSBTAG00000005162	ENSBTAT00000006804	NM_001075672	syntaxin 19 [Source:VGNC Symbol;Acc:VGNC:35435]	1	38315772	38331093	-1
Set_003	Gene_016	540175	GPRIN2	ENSBTAG00000046597	ENSBTAT00000063592	NM_001205783	G protein regulated inducer of neurite outgrowth 2 [Source:VGNC Symbol;Acc:VGNC:29610]	28	41805170	41807663	1
Set_003	Gene_017	497032	MTHFR	ENSBTAG00000020698	ENSBTAT00000072576	NM_001011685	methylenetetrahydrofolate reductase [Source:VGNC Symbol;Acc:VGNC:31731]	16	41872926	41891179	1
Set_003	Gene_018	617578	GPHA2	ENSBTAG00000007063	ENSBTAT00000009286	NM_001193166	glycoprotein hormone alpha 2 [Source:VGNC Symbol;Acc:VGNC:29533]	29	43156087	43156747	-1
Set_003	Gene_019	532693	NUDCD2	ENSBTAG00000014772	ENSBTAT00000019650	NM_001040553	NudC domain containing 2 [Source:VGNC Symbol;Acc:VGNC:32323]	7	75130784	75137127	-1
Set_003	Gene_020	508167	RRM2	ENSBTAG00000008216	ENSBTAT00000010802	NM_001244181	ribonucleotide reductase regulatory subunit M2 [Source:VGNC Symbol;Acc:VGNC:34165]	11	87488674	87495961	-1
Set_003	Gene_021	533145	PHLDB3	ENSBTAG00000004377	ENSBTAT00000005744	NM_001099056	pleckstrin homology like domain family B member 3 [Source:VGNC Symbol;Acc:VGNC:32839]	18	51684205	51710421	-1
Set_003	Gene_022	787225		ENSBTAG00000038759	ENSBTAT00000056308	NM_001099398	keratin associated protein-like [Source:NCBI gene;Acc:787225]	19	41253424	41254098	-1
Set_003	Gene_023	509884		ENSBTAG00000054640	ENSBTAT00000080446		olfactory receptor 4X2 [Source:NCBI gene;Acc:509884]	15	77992130	77993059	1
Set_003	Gene_024	506075	ARHGEF25	ENSBTAG00000018003	ENSBTAT00000023960	NM_001024481	Rho guanine nucleotide exchange factor 25 [Source:VGNC Symbol;Acc:VGNC:26112]	5	55872512	55879740	-1
Set_003	Gene_025	616136	CALHM6	ENSBTAG00000006549	ENSBTAT00000038044	NM_001206235	calcium homeostasis modulator family member 6 [Source:VGNC Symbol;Acc:VGNC:26712]	9	34245855	34248411	-1
Set_003	Gene_026	789943		ENSBTAG00000050464	ENSBTAT00000050501		olfactory receptor 13C2 [Source:NCBI gene;Acc:789943]	8	94262676	94263632	-1
Set_003	Gene_027	539541	HIC2	ENSBTAG00000005951	ENSBTAT00000007809	NM_001192270	HIC ZBTB transcriptional repressor 2 [Source:VGNC Symbol;Acc:VGNC:29846]	17	72191445	72195702	1
Set_003	Gene_028	282420	CSNK2A2	ENSBTAG00000013784	ENSBTAT00000018322	NM_174636	casein kinase 2 alpha 2 [Source:VGNC Symbol;Acc:VGNC:27769]	18	26016093	26051043	-1
Set_003	Gene_029	541597	KCNAB2	ENSBTAG00000008125	ENSBTAT00000070629	NM_001014383	potassium voltage-gated channel subfamily A regulatory beta subunit 2 [Source:VGNC Symbol;Acc:VGNC:30428]	16	47231521	47298388	-1
Set_003	Gene_030	525908	LDLRAD3	ENSBTAG00000044158	ENSBTAT00000061639	NM_001192619	low density lipoprotein receptor class A domain containing 3 [Source:VGNC Symbol;Acc:VGNC:30828]	15	66504294	66702598	1
Set_003	Gene_031	112443068	RF00026	ENSBTAG00000052942	ENSBTAT00000059238		RNA, U6 small nuclear 792, pseudogene [Source:HGNC Symbol;Acc:HGNC:47755]	20	30637143	30637249	-1
Set_003	Gene_032	535327	MAPK13	ENSBTAG00000010007	ENSBTAT00000013198	NM_001014947	mitogen-activated protein kinase 13 [Source:VGNC Symbol;Acc:VGNC:50213]	23	10058481	10067089	1
Set_003	Gene_033	767827	C1S	ENSBTAG00000004840	ENSBTAT00000006358	NM_001076550	complement C1s [Source:VGNC Symbol;Acc:VGNC:26630]	5	103407687	103419088	-1
Set_003	Gene_034	509273	FAHD1	ENSBTAG00000033015	ENSBTAT00000046873	NM_001075400	fumarylacetoacetate hydrolase domain containing 1 [Source:VGNC Symbol;Acc:VGNC:28708]	25	1392519	1394143	1
Set_003	Gene_035	540113	ATP6V1E2	ENSBTAG00000013734	ENSBTAT00000018250	NM_001079613	ATPase H+ transporting V1 subunit E2 [Source:VGNC Symbol;Acc:VGNC:26323]	11	28966166	28974105	-1
Set_003	Gene_036	613543	CENPJ	ENSBTAG00000017048	ENSBTAT00000022667		centromere protein J [Source:VGNC Symbol;Acc:VGNC:50039]	12	36486712	36521339	1
Set_003	Gene_037	614177	MAT2B	ENSBTAG00000012350	ENSBTAT00000016399	NM_001046526	methionine adenosyltransferase 2B [Source:VGNC Symbol;Acc:VGNC:31262]	7	75187453	75202949	1
Set_003	Gene_038	523999	PITPNM2	ENSBTAG00000001597	ENSBTAT00000072693		phosphatidylinositol transfer protein membrane associated 2 [Source:VGNC Symbol;Acc:VGNC:32922]	17	52428786	52553696	1
Set_003	Gene_039	785361	NUDT19	ENSBTAG00000023614	ENSBTAT00000045167	NM_001191214	nudix hydrolase 19 [Source:VGNC Symbol;Acc:VGNC:32334]	18	43165773	43201620	1
Set_003	Gene_040	NA		ENSBTAG00000048881	ENSBTAT00000074759			X	54912714	54921263	1
Set_003	Gene_041	NA		ENSBTAG00000050331	ENSBTAT00000075771			1	72071105	72072121	-1
Set_003	Gene_042	614585	CIAO2B	ENSBTAG00000013931	ENSBTAT00000066614		cytosolic iron-sulfur assembly component 2B [Source:VGNC Symbol;Acc:VGNC:28847]	18	34635125	34637400	-1
Set_003	Gene_043	282148	ATP6V0D1	ENSBTAG00000014553	ENSBTAT00000019346	NM_174505	ATPase H+ transporting V0 subunit d1 [Source:VGNC Symbol;Acc:VGNC:26312]	18	35046554	35085645	-1
Set_003	Gene_044	541235	PPM1L	ENSBTAG00000001274	ENSBTAT00000053250	NM_001099118	protein phosphatase, Mg2+/Mn2+ dependent 1L [Source:VGNC Symbol;Acc:VGNC:33216]	1	106405113	106727070	-1
Set_003	Gene_045	NA		ENSBTAG00000048683	ENSBTAT00000078803			24	59867308	59873713	1
Set_003	Gene_046	NA	RF00003	ENSBTAG00000028373	ENSBTAT00000040755		RNA, U1 small nuclear 146, pseudogene [Source:HGNC Symbol;Acc:HGNC:48488]	7	108515361	108515512	-1
Set_003	Gene_047	540671	IKZF4	ENSBTAG00000012636	ENSBTAT00000038192	NM_001192764	IKAROS family zinc finger 4 [Source:VGNC Symbol;Acc:VGNC:30105]	5	57292528	57302803	-1
Set_003	Gene_048	513591	TCOF1	ENSBTAG00000015224	ENSBTAT00000020259		treacle ribosome biogenesis factor 1 [Source:VGNC Symbol;Acc:VGNC:35700]	7	61708261	61746787	1
Set_003	Gene_049	107131843		ENSBTAG00000046753	ENSBTAT00000065659		insulin receptor substrate 1-like [Source:NCBI gene;Acc:107131843]	25	35984122	35987288	-1
Set_003	Gene_050	537028	36951	ENSBTAG00000047287	ENSBTAT00000061104		mitochondrial amidoxime reducing component 1 [Source:VGNC Symbol;Acc:VGNC:31235]	16	24269638	24292851	1
Set_003	Gene_051	NA	bta-mir-2285as-3	ENSBTAG00000053616	ENSBTAT00000077165		bta-mir-2285as-3 [Source:miRBase;Acc:MI0038163]	3	33245673	33245734	-1
Set_003	Gene_052	511415	MBTD1	ENSBTAG00000009407	ENSBTAT00000034943		mbt domain containing 1 [Source:VGNC Symbol;Acc:VGNC:31290]	19	35512988	35577544	1
Set_003	Gene_053	781988		ENSBTAG00000015047	ENSBTAT00000029977	NM_001101281	uncharacterized LOC781988 [Source:NCBI gene;Acc:781988]	6	84949480	84986700	-1
Set_003	Gene_054	NA	ZNF792	ENSBTAG00000002370	ENSBTAT00000017105		zinc finger protein 792 [Source:VGNC Symbol;Acc:VGNC:37348]	18	45697194	45702143	-1
Set_003	Gene_055	504984	TRAF3IP1	ENSBTAG00000015973	ENSBTAT00000086212		TRAF3 interacting protein 1 [Source:VGNC Symbol;Acc:VGNC:36273]	3	117639171	117699247	1
Set_003	Gene_056	NA		ENSBTAG00000036381	ENSBTAT00000050881			5	25998839	25998919	-1
Set_003	Gene_057	404164	ST3GAL5	ENSBTAG00000011601	ENSBTAT00000071618	NM_205807	ST3 beta-galactoside alpha-2,3-sialyltransferase 5 [Source:VGNC Symbol;Acc:VGNC:35334]	11	48977897	49034683	1
Set_003	Gene_058	515893	YIPF2	ENSBTAG00000025606	ENSBTAT00000036109	NM_001101094	Yip1 domain family member 2 [Source:VGNC Symbol;Acc:VGNC:37025]	7	15362807	15368373	-1
Set_003	Gene_059	789799		ENSBTAG00000046722	ENSBTAT00000066317		mastin [Source:NCBI gene;Acc:789799]	25	1009957	1011972	-1
Set_003	Gene_060	523485	MYO1E	ENSBTAG00000021538	ENSBTAT00000061089		myosin IE [Source:VGNC Symbol;Acc:VGNC:31820]	10	50958102	51177537	1
Set_003	Gene_061	NA	RF00424	ENSBTAG00000044443	ENSBTAT00000061876			19	54798502	54798689	1
Set_003	Gene_062	NA		ENSBTAG00000054174	ENSBTAT00000070569			13	2230617	2232787	-1
Set_003	Gene_063	506526	ITGA10	ENSBTAG00000008373	ENSBTAT00000011023	NM_001205590	integrin subunit alpha 10 [Source:VGNC Symbol;Acc:VGNC:30311]	3	21460548	21477566	1
Set_003	Gene_064	100138125	GCNT7	ENSBTAG00000006243	ENSBTAT00000080794		glucosaminyl (N-acetyl) transferase family member 7 [Source:VGNC Symbol;Acc:VGNC:57039]	13	59456875	59465525	1
Set_003	Gene_065	616591	LDOC1	ENSBTAG00000050730	ENSBTAT00000081186	NM_001081544	LDOC1, regulator of NFKB signaling [Source:NCBI gene;Acc:616591]	NKLS02002208.1	3782866	3784222	-1
Set_003	Gene_066	512045	C5	ENSBTAG00000012210	ENSBTAT00000016204	NM_001166616	complement C5 [Source:VGNC Symbol;Acc:VGNC:49997]	8	110338434	110435907	-1
Set_003	Gene_067	539707	TSSK6	ENSBTAG00000006649	ENSBTAT00000008738		testis specific serine kinase 6 [Source:VGNC Symbol;Acc:VGNC:50152]	7	3810680	3811501	1
Set_003	Gene_068	100847151		ENSBTAG00000040445	ENSBTAT00000017967		disintegrin and metalloproteinase domain-containing protein 5-like [Source:NCBI gene;Acc:100847151]	27	34425976	34551743	1
Set_003	Gene_069	510572	CDC37L1	ENSBTAG00000017137	ENSBTAT00000022777	NM_001098931	cell division cycle 37 like 1 [Source:VGNC Symbol;Acc:VGNC:27067]	8	39822427	39841618	-1
Set_003	Gene_070	NA		ENSBTAG00000050377	ENSBTAT00000087493			18	48525183	48527414	1
Set_003	Gene_071	100125233	STAU2	ENSBTAG00000002076	ENSBTAT00000075712		staufen double-stranded RNA binding protein 2 [Source:NCBI gene;Acc:100125233]	14	36760791	37064486	-1
Set_003	Gene_072	505662	SIRT7	ENSBTAG00000000039	ENSBTAT00000000043	NM_001075217	sirtuin 7 [Source:VGNC Symbol;Acc:VGNC:34636]	19	50976407	50982602	1
Set_003	Gene_073	539480	TOLLIP	ENSBTAG00000008237	ENSBTAT00000010835	NM_001039961	toll interacting protein [Source:VGNC Symbol;Acc:VGNC:36216]	29	50169950	50185623	1
Set_003	Gene_074	527553	CRP	ENSBTAG00000013907	ENSBTAT00000018469	NM_001144097	C-reactive protein [Source:VGNC Symbol;Acc:VGNC:27724]	3	9983501	9987619	1
Set_003	Gene_075	112446088	RF00026	ENSBTAG00000044716	ENSBTAT00000062149			3	112298365	112298469	1
Set_003	Gene_076	NA		ENSBTAG00000053816	ENSBTAT00000077956			6	24935715	24974989	-1
Set_003	Gene_077	527219	DMRTA1	ENSBTAG00000001315	ENSBTAT00000001735	NM_001192640	DMRT like family A1 [Source:VGNC Symbol;Acc:VGNC:28113]	8	21730255	21735209	-1
Set_003	Gene_078	616978	SFTA2	ENSBTAG00000038810	ENSBTAT00000054396	NM_001114523	surfactant associated 2 [Source:VGNC Symbol;Acc:VGNC:34527]	23	28142385	28143467	1
Set_003	Gene_079	506123	SF3B4	ENSBTAG00000012495	ENSBTAT00000016577	NM_001205584	splicing factor 3b subunit 4 [Source:VGNC Symbol;Acc:VGNC:55679]	3	20681758	20685817	1
Set_003	Gene_080	788872		ENSBTAG00000052372	ENSBTAT00000063232		olfactory receptor 51S1 [Source:NCBI gene;Acc:788872]	15	50141353	50142321	1
Set_003	Gene_081	100336501	TTLL8	ENSBTAG00000011098	ENSBTAT00000064340		tubulin tyrosine ligase like 8 [Source:VGNC Symbol;Acc:VGNC:56231]	5	119392379	119450153	-1
Set_003	Gene_082	534383	FBH1	ENSBTAG00000004147	ENSBTAT00000005426	NM_001099063	F-box DNA helicase 1 [Source:VGNC Symbol;Acc:VGNC:28896]	13	17565238	17604498	-1
Set_003	Gene_083	767942	GRN	ENSBTAG00000018823	ENSBTAT00000054338		granulin precursor [Source:VGNC Symbol;Acc:VGNC:29663]	19	44149003	44156201	1
Set_003	Gene_084	510141	CIB1	ENSBTAG00000021275	ENSBTAT00000070562		calcium and integrin binding 1 [Source:VGNC Symbol;Acc:VGNC:27359]	21	21614984	21621988	-1
Set_003	Gene_085	112441937	RF00026	ENSBTAG00000042396	ENSBTAT00000059388		RNA, U6 small nuclear 1204, pseudogene [Source:HGNC Symbol;Acc:HGNC:48167]	16	55448968	55449069	1
Set_003	Gene_086	618448	KLK12	ENSBTAG00000030484	ENSBTAT00000002923	NM_001193190	kallikrein related peptidase 12 [Source:VGNC Symbol;Acc:VGNC:30674]	18	57002427	57006377	-1
Set_003	Gene_087	NA		ENSBTAG00000026505	ENSBTAT00000037688			20	21931661	21932086	1
Set_003	Gene_088	787569	LARP6	ENSBTAG00000003915	ENSBTAT00000084463	NM_001099205	La ribonucleoprotein domain family member 6 [Source:VGNC Symbol;Acc:VGNC:30793]	10	17679370	17701804	-1
Set_003	Gene_089	510296	LMX1A	ENSBTAG00000012025	ENSBTAT00000015947	NM_001191325	LIM homeobox transcription factor 1 alpha [Source:VGNC Symbol;Acc:VGNC:30943]	3	3653710	3828022	1
Set_003	Gene_090	540647	GPR19	ENSBTAG00000011959	ENSBTAT00000015870	NM_001101214	G protein-coupled receptor 19 [Source:VGNC Symbol;Acc:VGNC:29578]	5	97139728	97163152	1
Set_003	Gene_091	NA		ENSBTAG00000054751	ENSBTAT00000084245			16	5004975	5021006	1
Set_003	Gene_092	767865	CBX4	ENSBTAG00000049156	ENSBTAT00000076497		chromobox 4 [Source:NCBI gene;Acc:767865]	19	52701295	52707712	1
Set_003	Gene_093	327675	ATP5F1B	ENSBTAG00000013315	ENSBTAT00000017710	NM_175796	ATP synthase F1 subunit beta [Source:VGNC Symbol;Acc:VGNC:26300]	5	56789495	56795018	1
Set_003	Gene_094	512667	ADAL	ENSBTAG00000014476	ENSBTAT00000019248	NM_001075577	adenosine deaminase like [Source:VGNC Symbol;Acc:VGNC:25603]	21	55085724	55109133	1
Set_003	Gene_095	520311	SH3GL3	ENSBTAG00000018004	ENSBTAT00000068877		SH3 domain containing GRB2 like 3, endophilin A3 [Source:VGNC Symbol;Acc:VGNC:34574]	21	24498758	24614322	-1
Set_003	Gene_096	NA		ENSBTAG00000048942	ENSBTAT00000070332			22	51389456	51391480	-1
Set_003	Gene_097	NA		ENSBTAG00000000242	ENSBTAT00000000299			1	57798617	57799321	-1
Set_003	Gene_098	504318	GAS8	ENSBTAG00000007096	ENSBTAT00000069505		growth arrest specific 8 [Source:VGNC Symbol;Acc:VGNC:29263]	18	14772666	14793387	1
Set_003	Gene_099	112443682	RF00007	ENSBTAG00000036754	ENSBTAT00000051254			2	38041545	38041692	1
Set_003	Gene_100	515126	AMZ2	ENSBTAG00000009345	ENSBTAT00000012301	NM_001034481	archaelysin family metallopeptidase 2 [Source:VGNC Symbol;Acc:VGNC:25878]	19	61889073	61897305	-1
Set_003	Gene_101	NA		ENSBTAG00000032696	ENSBTAT00000046428			X	57747313	57747792	1
Set_003	Gene_102	NA	RF00001	ENSBTAG00000049871	ENSBTAT00000074770			29	11403	11522	1
Set_003	Gene_103	510866	ZGPAT	ENSBTAG00000007498	ENSBTAT00000009860		zinc finger CCCH-type and G-patch domain containing [Source:VGNC Symbol;Acc:VGNC:57036]	13	54034397	54047311	-1
Set_003	Gene_104	NA		ENSBTAG00000054536	ENSBTAT00000071332			29	50388061	50415394	1
Set_003	Gene_105	767936	P2RY14	ENSBTAG00000020990	ENSBTAT00000027950	NM_001077009	purinergic receptor P2Y14 [Source:VGNC Symbol;Acc:VGNC:32527]	1	116847497	116879544	1
Set_003	Gene_106	532546	AAK1	ENSBTAG00000009343	ENSBTAT00000078982		AP2 associated kinase 1 [Source:VGNC Symbol;Acc:VGNC:25443]	11	67828491	67990881	-1
Set_003	Gene_107	539014	C14H8orf76	ENSBTAG00000015319	ENSBTAT00000020362	NM_001205614	chromosome 14 C8orf76 homolog [Source:NCBI gene;Acc:539014]	14	16566090	16583706	1
Set_003	Gene_108	788353	KIAA1522	ENSBTAG00000018062	ENSBTAT00000074403		KIAA1522 [Source:VGNC Symbol;Acc:VGNC:30570]	2	120883700	120910058	-1
Set_003	Gene_109	287327	NDUFS3	ENSBTAG00000018483	ENSBTAT00000024600	NM_174819	NADH:ubiquinone oxidoreductase core subunit S3 [Source:VGNC Symbol;Acc:VGNC:50228]	15	77379153	77383888	1
Set_003	Gene_110	NA		ENSBTAG00000054949	ENSBTAT00000079774			NKLS02000591.1	13808	23769	-1
Set_003	Gene_111	614798	MFSD6L	ENSBTAG00000039012	ENSBTAT00000054541	NM_001102523	major facilitator superfamily domain containing 6 like [Source:VGNC Symbol;Acc:VGNC:55846]	19	28289946	28292101	-1
Set_003	Gene_112	618757	PHF21B	ENSBTAG00000006973	ENSBTAT00000070419		PHD finger protein 21B [Source:VGNC Symbol;Acc:VGNC:32822]	5	115395022	115482327	-1
Set_003	Gene_113	112442845	RF00004	ENSBTAG00000053925	ENSBTAT00000070178			19	43252658	43252848	-1
Set_003	Gene_114	NA		ENSBTAG00000050749	ENSBTAT00000067917			5	102915951	103003566	-1
Set_003	Gene_115	515013	SCRN2	ENSBTAG00000001828	ENSBTAT00000002390	NM_001205804	secernin 2 [Source:VGNC Symbol;Acc:VGNC:34367]	19	38623127	38626863	1
Set_003	Gene_116	518003	TRIL	ENSBTAG00000024340	ENSBTAT00000033672		TLR4 interactor with leucine rich repeats [Source:VGNC Symbol;Acc:VGNC:36311]	4	67204660	67207092	1
Set_003	Gene_117	112447960	RF00026	ENSBTAG00000043078	ENSBTAT00000060070			8	72400784	72400887	1
Set_003	Gene_118	514021	ZNF599	ENSBTAG00000009895	ENSBTAT00000075292		zinc finger protein 599 [Source:VGNC Symbol;Acc:VGNC:50120]	18	45515132	45556175	-1
Set_003	Gene_119	NA		ENSBTAG00000050898	ENSBTAT00000066537			21	4729694	4731153	-1
Set_003	Gene_120	615008	C6H4orf3	ENSBTAG00000048273	ENSBTAT00000080782		chromosome 6 C4orf3 homolog [Source:VGNC Symbol;Acc:VGNC:53691]	6	6006538	6012855	1
Set_003	Gene_121	NA	RF02159	ENSBTAG00000053169	ENSBTAT00000086369			20	18742970	18743192	-1
Set_003	Gene_122	514189		ENSBTAG00000050943	ENSBTAT00000067379		uncharacterized LOC514189 [Source:NCBI gene;Acc:514189]	8	61901164	61909442	1
Set_003	Gene_123	353112	DBIL5	ENSBTAG00000013395	ENSBTAT00000017822	NM_178322	endozepine-like peptide 2 [Source:NCBI gene;Acc:353112]	19	22088603	22089801	-1
Set_003	Gene_124	517962	SDF2L1	ENSBTAG00000000067	ENSBTAT00000000074	NM_001035323	stromal cell derived factor 2 like 1 [Source:VGNC Symbol;Acc:VGNC:34386]	17	72112056	72114638	-1
Set_003	Gene_125	280977	ACP1	ENSBTAG00000020498	ENSBTAT00000050657		acid phosphatase 1 [Source:NCBI gene;Acc:280977]	8	112748923	112763330	-1
Set_003	Gene_126	783831	SELENOT	ENSBTAG00000031435	ENSBTAT00000044548	NM_001103103	selenoprotein T [Source:VGNC Symbol;Acc:VGNC:53604]	1	117507281	117537602	-1
Set_003	Gene_127	515542	ZCCHC10	ENSBTAG00000030616	ENSBTAT00000035343	NM_001038545	zinc finger CCHC-type containing 10 [Source:VGNC Symbol;Acc:VGNC:37115]	7	44567086	44580862	-1
Set_003	Gene_128	617478	CCDC190	ENSBTAG00000027425	ENSBTAT00000039375	NM_001076462	coiled-coil domain containing 190 [Source:VGNC Symbol;Acc:VGNC:26883]	3	6567409	6576468	1
Set_003	Gene_129	537502	ANKLE1	ENSBTAG00000012592	ENSBTAT00000016715		ankyrin repeat and LEM domain containing 1 [Source:VGNC Symbol;Acc:VGNC:25903]	7	5830530	5836468	-1
Set_003	Gene_130	509394	ISYNA1	ENSBTAG00000017482	ENSBTAT00000023241	NM_001046032	inositol-3-phosphate synthase 1 [Source:VGNC Symbol;Acc:VGNC:30306]	7	4737566	4740763	1
Set_003	Gene_131	514886	STK4	ENSBTAG00000003257	ENSBTAT00000004221	NM_001015602	serine/threonine kinase 4 [Source:VGNC Symbol;Acc:VGNC:35401]	13	73371418	73458717	1
Set_003	Gene_132	112448645	RF00026	ENSBTAG00000051742	ENSBTAT00000087383			10	66117297	66117403	1
Set_003	Gene_133	NA		ENSBTAG00000051344	ENSBTAT00000086243			7	51969350	51969757	-1
Set_003	Gene_134	280677	C3	ENSBTAG00000017280	ENSBTAT00000022979	NM_001040469	complement C3 [Source:VGNC Symbol;Acc:VGNC:26638]	7	17773675	17810616	1
Set_003	Gene_135	526711	CCDC102B	ENSBTAG00000006726	ENSBTAT00000008842		coiled-coil domain containing 102B [Source:VGNC Symbol;Acc:VGNC:56364]	24	8121426	8402158	-1
Set_003	Gene_136	511043	LAMC2	ENSBTAG00000000793	ENSBTAT00000067424		laminin subunit gamma 2 [Source:VGNC Symbol;Acc:VGNC:30774]	16	64223528	64289609	1
Set_003	Gene_137	112444805	RF00571	ENSBTAG00000047641	ENSBTAT00000065218			28	4439397	4439470	-1
Set_003	Gene_138	NA		ENSBTAG00000055292	ENSBTAT00000084011			X	37644914	37655916	-1
Set_003	Gene_139	516493	POU2F3	ENSBTAG00000021340	ENSBTAT00000028444	NM_001205830	POU class 2 homeobox 3 [Source:VGNC Symbol;Acc:VGNC:33175]	15	30816877	30903525	1
Set_003	Gene_140	521196	RAF1	ENSBTAG00000045748	ENSBTAT00000005930	NM_001102505	Raf-1 proto-oncogene, serine/threonine kinase [Source:NCBI gene;Acc:521196]	22	56467496	56543343	1
Set_003	Gene_141	615374		ENSBTAG00000034743	ENSBTAT00000028897		olfactory receptor, family 2, subfamily T, member 2 [Source:NCBI gene;Acc:615374]	7	42117972	42118946	1
Set_003	Gene_142	614993	KIAA2012	ENSBTAG00000034192	ENSBTAT00000016854		KIAA2012 [Source:VGNC Symbol;Acc:VGNC:30578]	2	90611066	90737262	1
Set_003	Gene_143	112442138	RF00026	ENSBTAG00000044838	ENSBTAT00000062271			17	47156870	47156975	-1
Set_003	Gene_144	NA		ENSBTAG00000025604	ENSBTAT00000036108			4	16376195	16376872	1
Set_003	Gene_145	536784	PLCXD2	ENSBTAG00000012646	ENSBTAT00000016779		phosphatidylinositol specific phospholipase C X domain containing 2 [Source:VGNC Symbol;Acc:VGNC:32993]	1	56425478	56476144	1
Set_003	Gene_146	783235	IRX1	ENSBTAG00000000809	ENSBTAT00000066911		iroquois homeobox 1 [Source:VGNC Symbol;Acc:VGNC:30286]	20	69312348	69335913	-1
Set_003	Gene_147	513156	XPNPEP1	ENSBTAG00000004438	ENSBTAT00000057101	NM_001075602	X-prolyl aminopeptidase 1 [Source:VGNC Symbol;Acc:VGNC:36994]	26	30430380	30482338	-1
Set_003	Gene_148	534214	G3BP1	ENSBTAG00000020309	ENSBTAT00000027067	NM_001037611	G3BP stress granule assembly factor 1 [Source:VGNC Symbol;Acc:VGNC:29176]	7	62972675	63001442	1
Set_003	Gene_149	783948	RSL24D1	ENSBTAG00000001342	ENSBTAT00000071257		ribosomal L24 domain containing 1 [Source:VGNC Symbol;Acc:VGNC:34181]	10	55098884	55113416	1
Set_003	Gene_150	281650	BLVRB	ENSBTAG00000010508	ENSBTAT00000013889	NM_174251	biliverdin reductase B [Source:VGNC Symbol;Acc:VGNC:26511]	18	49781065	49798244	-1
Set_003	Gene_151	523285	ARRDC2	ENSBTAG00000039335	ENSBTAT00000002229	NM_001081592	arrestin domain containing 2 [Source:VGNC Symbol;Acc:VGNC:26172]	7	5175099	5179620	-1
Set_003	Gene_152	282413	CACNA1I	ENSBTAG00000045610	ENSBTAT00000073372		calcium voltage-gated channel subunit alpha1 I [Source:VGNC Symbol;Acc:VGNC:55869]	5	110989656	111105495	1
Set_003	Gene_153	512745	RPL11	ENSBTAG00000020905	ENSBTAT00000027850		ribosomal protein L11 [Source:VGNC Symbol;Acc:VGNC:34108]	2	129168191	129198058	-1
Set_003	Gene_154	616679	ARL5B	ENSBTAG00000043964	ENSBTAT00000061579		ADP ribosylation factor like GTPase 5B [Source:VGNC Symbol;Acc:VGNC:26148]	13	20313813	20334424	1
Set_003	Gene_155	NA		ENSBTAG00000053818	ENSBTAT00000070344			8	7233398	7237736	1
Set_003	Gene_156	786529	SLC25A53	ENSBTAG00000054469	ENSBTAT00000086594	NM_001191233	solute carrier family 25 member 53 [Source:NCBI gene;Acc:786529]	X	52795553	52807365	-1
Set_003	Gene_157	504592	MAP3K2	ENSBTAG00000004216	ENSBTAT00000005525		mitogen-activated protein kinase kinase kinase 2 [Source:VGNC Symbol;Acc:VGNC:31195]	2	5199357	5234002	1
Set_003	Gene_158	407196	HTR1F	ENSBTAG00000039151	ENSBTAT00000052346	NM_001206605	5-hydroxytryptamine receptor 1F [Source:VGNC Symbol;Acc:VGNC:29995]	1	36006380	36007572	1
Set_003	Gene_159	100336611	CNTNAP5	ENSBTAG00000031898	ENSBTAT00000070785		contactin associated protein like 5 [Source:VGNC Symbol;Acc:VGNC:55338]	2	76113318	76921405	1
Set_003	Gene_160	519982	RAB33B	ENSBTAG00000003208	ENSBTAT00000004165	NM_001083440	RAB33B, member RAS oncogene family [Source:VGNC Symbol;Acc:VGNC:33643]	17	18245545	18266086	-1
Set_003	Gene_161	787633	HES5	ENSBTAG00000002483	ENSBTAT00000003221	NM_001105467	hes family bHLH transcription factor 5 [Source:VGNC Symbol;Acc:VGNC:29822]	16	50339379	50341218	1
Set_003	Gene_162	536838	SLC35A1	ENSBTAG00000014057	ENSBTAT00000018680	NM_001034637	solute carrier family 35 member A1 [Source:VGNC Symbol;Acc:VGNC:34819]	9	62413961	62445501	-1
Set_003	Gene_163	NA		ENSBTAG00000039809	ENSBTAT00000053935			7	13762762	13769861	-1
Set_003	Gene_164	282261	IGFBP3	ENSBTAG00000003994	ENSBTAT00000053426	NM_174556	insulin like growth factor binding protein 3 [Source:VGNC Symbol;Acc:VGNC:30085]	4	76116349	76124835	1
Set_003	Gene_165	NA		ENSBTAG00000014988	ENSBTAT00000019953			2	119471574	119471963	1
Set_003	Gene_166	281556	TUFM	ENSBTAG00000019216	ENSBTAT00000025586	NM_174207	Tu translation elongation factor, mitochondrial [Source:VGNC Symbol;Acc:VGNC:36517]	25	25967782	25971740	1
Set_003	Gene_167	613736	MED22	ENSBTAG00000011556	ENSBTAT00000015357	NM_001034742	mediator complex subunit 22 [Source:VGNC Symbol;Acc:VGNC:31359]	11	104249112	104255687	-1
Set_003	Gene_168	541161	DKK2	ENSBTAG00000012969	ENSBTAT00000017242	NM_001082615	dickkopf WNT signaling pathway inhibitor 2 [Source:VGNC Symbol;Acc:VGNC:28080]	6	18125623	18254810	1
Set_003	Gene_169	511966	C2CD2L	ENSBTAG00000015013	ENSBTAT00000019988	NM_001105358	C2CD2 like [Source:VGNC Symbol;Acc:VGNC:26632]	15	29685465	29695831	1
Set_003	Gene_170	512551	OR10S1	ENSBTAG00000010752	ENSBTAT00000014244		olfactory receptor, family 10, subfamily S, member 1 [Source:NCBI gene;Acc:512551]	29	26618039	26618857	-1
Set_003	Gene_171	100913175		ENSBTAG00000049760	ENSBTAT00000082244		defensin beta 132 [Source:NCBI gene;Acc:100913175]	13	60755630	60757340	-1
Set_003	Gene_172	281637	ARRB1	ENSBTAG00000020485	ENSBTAT00000045006	NM_174243	arrestin beta 1 [Source:VGNC Symbol;Acc:VGNC:26169]	15	54480057	54553148	-1
Set_003	Gene_173	513682		ENSBTAG00000031923	ENSBTAT00000045270		olfactory receptor, family 52, subfamily K, member 1 [Source:NCBI gene;Acc:513682]	15	50541889	50542833	1
Set_003	Gene_174	540486	TIPRL	ENSBTAG00000005393	ENSBTAT00000007093	NM_001079615	TOR signaling pathway regulator [Source:VGNC Symbol;Acc:VGNC:35878]	3	386406	455451	-1
Set_003	Gene_175	523885	TMEM135	ENSBTAG00000005482	ENSBTAT00000085727	NM_001035348	transmembrane protein 135 [Source:VGNC Symbol;Acc:VGNC:56288]	29	8236863	8540319	-1
Set_003	Gene_176	NA		ENSBTAG00000034398	ENSBTAT00000048734			21	5233821	5234186	-1
Set_003	Gene_177	536075	TXNDC16	ENSBTAG00000010399	ENSBTAT00000084670	NM_001205394	thioredoxin domain containing 16 [Source:VGNC Symbol;Acc:VGNC:36537]	10	11623049	11719602	1
Set_003	Gene_178	112443694	RF00026	ENSBTAG00000049118	ENSBTAT00000084126			2	26545875	26545981	-1
Set_003	Gene_179	NA		ENSBTAG00000050057	ENSBTAT00000069649			2	69839614	69841402	-1
Set_003	Gene_180	NA	MPP3	ENSBTAG00000017536	ENSBTAT00000023316		membrane palmitoylated protein 3 [Source:VGNC Symbol;Acc:VGNC:55850]	19	43688049	43714818	-1
Set_003	Gene_181	282224	ETAA1	ENSBTAG00000011727	ENSBTAT00000015577	NM_001075128	ETAA1, ATR kinase activator [Source:VGNC Symbol;Acc:VGNC:28616]	11	65838846	65852520	1
Set_003	Gene_182	NA		ENSBTAG00000050153	ENSBTAT00000082639			NKLS02001366.1	2701	10550	1
Set_003	Gene_183	100313048	bta-mir-432	ENSBTAG00000029911	ENSBTAT00000042290		bta-mir-432 [Source:miRBase;Acc:MI0009831]	21	65782181	65782270	1
Set_003	Gene_184	NA	GPR152	ENSBTAG00000046728	ENSBTAT00000066318		G protein-coupled receptor 152 [Source:VGNC Symbol;Acc:VGNC:29559]	29	45340103	45341524	-1
Set_003	Gene_185	522573	CCDC172	ENSBTAG00000032299	ENSBTAT00000045806	NM_001075833	coiled-coil domain containing 172 [Source:VGNC Symbol;Acc:VGNC:26869]	26	36749674	36807371	1
Set_003	Gene_186	507313	MPST	ENSBTAG00000030648	ENSBTAT00000069079	NM_001034291	mercaptopyruvate sulfurtransferase [Source:VGNC Symbol;Acc:VGNC:31589]	5	75441888	75452001	1
Set_003	Gene_187	NA		ENSBTAG00000030281	ENSBTAT00000042757			11	104132816	104133394	-1
Set_003	Gene_188	NA		ENSBTAG00000051997	ENSBTAT00000074966			13	74378712	74400024	-1
Set_003	Gene_189	512500	CYC1	ENSBTAG00000012232	ENSBTAT00000016224	NM_001038090	cytochrome c1 [Source:VGNC Symbol;Acc:VGNC:50266]	14	738124	740518	-1
Set_003	Gene_190	NA	ZNF234	ENSBTAG00000049610	ENSBTAT00000055214		zinc finger protein 234 [Source:HGNC Symbol;Acc:HGNC:13027]	18	52126678	52131347	1
Set_003	Gene_191	509328	CSGALNACT2	ENSBTAG00000005165	ENSBTAT00000006810		chondroitin sulfate N-acetylgalactosaminyltransferase 2 [Source:VGNC Symbol;Acc:VGNC:27760]	28	13532555	13584917	1
Set_003	Gene_192	515331	PTGDR	ENSBTAG00000006703	ENSBTAT00000008808	NM_001098034	prostaglandin D2 receptor [Source:VGNC Symbol;Acc:VGNC:33499]	10	45157991	45165480	1
Set_003	Gene_193	112449178	RF00619	ENSBTAG00000042849	ENSBTAT00000059841			12	44566883	44567008	1
Set_003	Gene_194	510360	BMP1	ENSBTAG00000000917	ENSBTAT00000001218		bone morphogenetic protein 1 [Source:VGNC Symbol;Acc:VGNC:26514]	8	69478799	69526082	1
Set_003	Gene_195	NA		ENSBTAG00000049335	ENSBTAT00000069580			23	36537388	36573775	1
Set_003	Gene_196	282150	BCKDHB	ENSBTAG00000012096	ENSBTAT00000016044	NM_174507	branched chain keto acid dehydrogenase E1 subunit beta [Source:NCBI gene;Acc:282150]	9	19804029	20074759	1
Set_003	Gene_197	100137872	AKT3	ENSBTAG00000017788	ENSBTAT00000023654	NM_001191309	AKT serine/threonine kinase 3 [Source:VGNC Symbol;Acc:VGNC:25800]	16	33368079	33633753	1
Set_003	Gene_198	617253	PUDP	ENSBTAG00000000207	ENSBTAT00000000246	NM_001046595	pseudouridine 5'-phosphatase [Source:VGNC Symbol;Acc:VGNC:33568]	X	135627402	135693969	1
Set_003	Gene_199	NA		ENSBTAG00000052302	ENSBTAT00000068027			28	27089142	27146259	1
Set_003	Gene_200	NA	RF00001	ENSBTAG00000053686	ENSBTAT00000065353			1	479417	479535	1
Set_003	Gene_201	112441578		ENSBTAG00000053133	ENSBTAT00000071115		olfactory receptor 51L1 [Source:NCBI gene;Acc:112441578]	15	49923749	49924696	-1
Set_003	Gene_202	535056	RPL8	ENSBTAG00000026327	ENSBTAT00000037367	NM_001034625	ribosomal protein L8 [Source:NCBI gene;Acc:535056]	14	321231	324177	-1
Set_003	Gene_203	519845	TOX2	ENSBTAG00000016741	ENSBTAT00000022257	NM_001206688	TOX high mobility group box family member 2 [Source:VGNC Symbol;Acc:VGNC:55084]	13	72414396	72567739	1
Set_003	Gene_204	509115	MRPS7	ENSBTAG00000016133	ENSBTAT00000021471	NM_001034343	mitochondrial ribosomal protein S7 [Source:VGNC Symbol;Acc:VGNC:31677]	19	56222482	56226605	-1
Set_003	Gene_205	614986	PUS10	ENSBTAG00000009694	ENSBTAT00000012785	NM_001206837	pseudouridine synthase 10 [Source:VGNC Symbol;Acc:VGNC:33575]	11	43674599	43760004	-1
Set_003	Gene_206	523627	ADAM33	ENSBTAG00000013163	ENSBTAT00000017511		ADAM metallopeptidase domain 33 [Source:VGNC Symbol;Acc:VGNC:25611]	13	51512829	51523330	1
Set_003	Gene_207	506601	RCAN3	ENSBTAG00000017452	ENSBTAT00000023194	NM_001045945	RCAN family member 3 [Source:VGNC Symbol;Acc:VGNC:33822]	2	128388785	128422500	-1
Set_003	Gene_208	281170	FRZB	ENSBTAG00000010977	ENSBTAT00000014572	NM_174059	frizzled related protein [Source:VGNC Symbol;Acc:VGNC:29124]	2	13693338	13730072	1
Set_003	Gene_209	507075	PAQR4	ENSBTAG00000004727	ENSBTAT00000006203	NM_001098897	progestin and adipoQ receptor family member 4 [Source:VGNC Symbol;Acc:VGNC:32576]	25	2376855	2380341	1
Set_003	Gene_210	532483	ING4	ENSBTAG00000017064	ENSBTAT00000022686	NM_001035389	inhibitor of growth family member 4 [Source:VGNC Symbol;Acc:VGNC:30197]	5	103778087	103785354	1
Set_003	Gene_211	100300490	ENTPD7	ENSBTAG00000047077	ENSBTAT00000062934		ectonucleoside triphosphate diphosphohydrolase 7 [Source:VGNC Symbol;Acc:VGNC:28512]	26	20622608	20655036	1
Set_003	Gene_212	528362	GRIFIN	ENSBTAG00000020896	ENSBTAT00000027839	NM_001206700	galectin-related inter-fiber protein [Source:VGNC Symbol;Acc:VGNC:29642]	25	40800339	40801701	1
Set_003	Gene_213	112443628	RF00026	ENSBTAG00000045962	ENSBTAT00000062924			2	25871298	25871401	-1
Set_003	Gene_214	517246		ENSBTAG00000054260	ENSBTAT00000067793		cytochrome P450 CYP3A24 [Source:NCBI gene;Acc:517246]	25	36710741	36759920	-1
Set_003	Gene_215	112446904		ENSBTAG00000054173	ENSBTAT00000079500		keratin-associated protein 6-2-like [Source:NCBI gene;Acc:112446904]	1	4857239	4857508	1
Set_003	Gene_216	112445712		ENSBTAG00000053069	ENSBTAT00000067789		mRNA cap guanine-N7 methyltransferase-like [Source:NCBI gene;Acc:112445712]	NKLS02001691.1	11738	15591	1
Set_003	Gene_217	614947	BORCS5	ENSBTAG00000008989	ENSBTAT00000011832	NM_001076355	BLOC-1 related complex subunit 5 [Source:VGNC Symbol;Acc:VGNC:26542]	5	97342528	97440530	-1
Set_003	Gene_218	534304	STX17	ENSBTAG00000008016	ENSBTAT00000010541	NM_001034606	syntaxin 17 [Source:VGNC Symbol;Acc:VGNC:35433]	8	64953185	65022721	1
Set_003	Gene_219	100313045	bta-mir-410	ENSBTAG00000036364	ENSBTAT00000050864		bta-mir-410 [Source:miRBase;Acc:MI0009825]	21	65954512	65954592	1
Set_003	Gene_220	782050	RNF219	ENSBTAG00000000869	ENSBTAT00000001156	NM_001105458	ring finger protein 219 [Source:VGNC Symbol;Acc:VGNC:34054]	12	53756338	53801246	-1
Set_003	Gene_221	513000	ING3	ENSBTAG00000016332	ENSBTAT00000021725	NM_001192944	inhibitor of growth family member 3 [Source:VGNC Symbol;Acc:VGNC:30196]	4	85453414	85480394	1
Set_003	Gene_222	512975	CLDN7	ENSBTAG00000019448	ENSBTAT00000025906	NM_001040519	claudin 7 [Source:VGNC Symbol;Acc:VGNC:55796]	19	26970222	26972580	-1
Set_003	Gene_223	789838	FBXL18	ENSBTAG00000010264	ENSBTAT00000043540		F-box and leucine rich repeat protein 18 [Source:VGNC Symbol;Acc:VGNC:52774]	25	38809820	38840353	1
Set_003	Gene_224	NA		ENSBTAG00000052171	ENSBTAT00000076276			22	5771256	5779045	-1
Set_003	Gene_225	NA	RF00001	ENSBTAG00000029179	ENSBTAT00000041558			12	18988039	18988144	1
Set_003	Gene_226	NA		ENSBTAG00000051813	ENSBTAT00000078739			19	18057350	18058402	-1
Set_003	Gene_227	519557	AADAC	ENSBTAG00000011569	ENSBTAT00000015373	NM_001075791	arylacetamide deacetylase (esterase) [Source:NCBI gene;Acc:519557]	1	116033356	116050220	-1
Set_003	Gene_228	112446522	RF00026	ENSBTAG00000052196	ENSBTAT00000078956			4	710545	710651	-1
Set_003	Gene_229	784457	PRRT1B	ENSBTAG00000052831	ENSBTAT00000084328		proline rich transmembrane protein 1B [Source:NCBI gene;Acc:784457]	11	101652894	101678757	1
Set_003	Gene_230	527433	KIF1BP	ENSBTAG00000014561	ENSBTAT00000019353	NM_001034559	KIF1 binding protein [Source:VGNC Symbol;Acc:VGNC:30592]	28	25247950	25302700	1
Set_003	Gene_231	517584	LRRC8B	ENSBTAG00000020214	ENSBTAT00000069929		leucine rich repeat containing 8 VRAC subunit B [Source:VGNC Symbol;Acc:VGNC:31030]	3	53688735	53713047	-1
Set_003	Gene_232	100313050	bta-mir-449b	ENSBTAG00000030027	ENSBTAT00000042406		bta-mir-449b [Source:miRBase;Acc:MI0009835]	20	23943192	23943289	1
Set_003	Gene_233	509263	C16H1orf159	ENSBTAG00000014511	ENSBTAT00000072518		chromosome 16 C1orf159 homolog [Source:NCBI gene;Acc:509263]	16	51375151	51400873	1
Set_003	Gene_234	282602	TLR9	ENSBTAG00000018198	ENSBTAT00000024223	NM_183081	toll like receptor 9 [Source:NCBI gene;Acc:282602]	22	48676660	48680938	1
Set_003	Gene_235	513538	NPTX1	ENSBTAG00000008940	ENSBTAT00000011769	NM_001192354	neuronal pentraxin 1 [Source:VGNC Symbol;Acc:VGNC:32218]	19	52059956	52066350	1
Set_003	Gene_236	104968446	HIST1H2AG	ENSBTAG00000048599	ENSBTAT00000014123		histone cluster 1, H2ag [Source:NCBI gene;Acc:616790]	23	31362659	31363051	-1
Set_003	Gene_237	515680	NFX1	ENSBTAG00000012385	ENSBTAT00000045206	NM_001102029	nuclear transcription factor, X-box binding 1 [Source:VGNC Symbol;Acc:VGNC:32053]	8	75057600	75125297	1
Set_003	Gene_238	100170935	bta-mir-365-1	ENSBTAG00000029848	ENSBTAT00000042227		bta-mir-365-1 [Source:miRBase;Acc:MI0005465]	25	13253584	13253670	1
Set_003	Gene_239	506295	MYADM	ENSBTAG00000018152	ENSBTAT00000024157	NM_001075252	myeloid associated differentiation marker [Source:NCBI gene;Acc:506295]	18	61573948	61579533	1
Set_003	Gene_240	NA		ENSBTAG00000043572	ENSBTAT00000060572			MT	15658	15726	1
Set_003	Gene_241	100300004	GLTPD2	ENSBTAG00000048034	ENSBTAT00000063979		glycolipid transfer protein domain containing 2 [Source:VGNC Symbol;Acc:VGNC:29425]	19	26571233	26572537	-1
Set_003	Gene_242	513278	NOLC1	ENSBTAG00000007435	ENSBTAT00000009775	NM_001075608	nucleolar and coiled-body phosphoprotein 1 [Source:VGNC Symbol;Acc:VGNC:32161]	26	22820386	22829196	1
Set_003	Gene_243	112449666	RF00156	ENSBTAG00000042171	ENSBTAT00000059163			14	64580622	64580756	-1
Set_003	Gene_244	519808	SUPT5H	ENSBTAG00000010467	ENSBTAT00000070366		SPT5 homolog, DSIF elongation factor subunit [Source:VGNC Symbol;Acc:VGNC:35481]	18	49132458	49159095	1
Set_003	Gene_245	NA		ENSBTAG00000049810	ENSBTAT00000067809			4	105641093	105643574	1
Set_003	Gene_246	415111	MS4A8	ENSBTAG00000009289	ENSBTAT00000012238	NM_001034056	membrane spanning 4-domains A8 [Source:VGNC Symbol;Acc:VGNC:31687]	29	37057599	37073704	1
Set_003	Gene_247	507076	MOXD1	ENSBTAG00000019460	ENSBTAT00000025923		monooxygenase DBH like 1 [Source:VGNC Symbol;Acc:VGNC:31568]	9	70257747	70355603	-1
Set_003	Gene_248	510218	ALPK2	ENSBTAG00000014284	ENSBTAT00000075387		alpha kinase 2 [Source:VGNC Symbol;Acc:VGNC:25848]	24	57611636	57740561	-1
Set_003	Gene_249	100313349	bta-mir-2479	ENSBTAG00000052615	ENSBTAT00000085835		bta-mir-2479 [Source:miRBase;Acc:MI0011541]	9	37041903	37041975	1
Set_003	Gene_250	513589	SLA	ENSBTAG00000007828	ENSBTAT00000081400		Src like adaptor [Source:VGNC Symbol;Acc:VGNC:34650]	14	8250306	8315788	1
Set_004	Gene_001	100270792	COX6B1	ENSBTAG00000055082	ENSBTAT00000067651		cytochrome c oxidase subunit VIb polypeptide 1 (ubiquitous) [Source:NCBI gene;Acc:100270792]	18	46378362	46387003	1
Set_004	Gene_002	540145	FBXO43	ENSBTAG00000019795	ENSBTAT00000046169		F-box protein 43 [Source:VGNC Symbol;Acc:VGNC:28914]	14	64227507	64239663	1
Set_004	Gene_003	NA		ENSBTAG00000054445	ENSBTAT00000086621			16	1073887	1076004	1
Set_004	Gene_004	782101		ENSBTAG00000019284	ENSBTAT00000025677	NM_001281927	COP9 constitutive photomorphogenic homolog subunit 2-like [Source:NCBI gene;Acc:782101]	11	84090372	84091724	-1
Set_004	Gene_005	112448183	RF00026	ENSBTAG00000049269	ENSBTAT00000087267			9	46175169	46175275	-1
Set_004	Gene_006	615467	LRRC32	ENSBTAG00000001301	ENSBTAT00000001716	NM_001193075	leucine rich repeat containing 32 [Source:VGNC Symbol;Acc:VGNC:54884]	15	56045705	56057707	-1
Set_004	Gene_007	101905689	MKS1	ENSBTAG00000034963	ENSBTAT00000082610		Meckel syndrome, type 1 [Source:NCBI gene;Acc:101905689]	19	9146071	9161341	-1
Set_004	Gene_008	514626	MXD1	ENSBTAG00000001042	ENSBTAT00000001384	NM_001192380	MAX dimerization protein 1 [Source:VGNC Symbol;Acc:VGNC:31771]	11	68259932	68282685	1
Set_004	Gene_009	107132069		ENSBTAG00000055147	ENSBTAT00000064315		histone H2B type 1-H-like [Source:NCBI gene;Acc:107132069]	X	88307513	88307893	-1
Set_004	Gene_010	281341	MYL6	ENSBTAG00000010799	ENSBTAT00000014304	NM_175780	myosin light chain 6 [Source:VGNC Symbol;Acc:VGNC:50223]	5	57161869	57164985	-1
Set_004	Gene_011	NA		ENSBTAG00000050598	ENSBTAT00000085811			10	825380	825835	1
Set_004	Gene_012	530601		ENSBTAG00000054539	ENSBTAT00000054562		olfactory receptor, family 10, subfamily J, member 1 [Source:NCBI gene;Acc:530601]	3	10343223	10345696	-1
Set_004	Gene_013	789634	TOR3A	ENSBTAG00000014006	ENSBTAT00000018609	NM_001080376	torsin family 3 member A [Source:VGNC Symbol;Acc:VGNC:36226]	16	60422988	60450960	1
Set_004	Gene_014	521224		ENSBTAG00000005448	ENSBTAT00000007169		ras GTPase-activating protein 4 [Source:NCBI gene;Acc:521224]	25	34549739	34572255	1
Set_004	Gene_015	NA		ENSBTAG00000049257	ENSBTAT00000074950			3	13430503	13433681	-1
Set_004	Gene_016	NA		ENSBTAG00000048952	ENSBTAT00000084074			19	22809136	22815031	-1
Set_004	Gene_017	539213	LHX3	ENSBTAG00000011124	ENSBTAT00000055580	NM_001038620	LIM homeobox 3 [Source:VGNC Symbol;Acc:VGNC:30873]	11	103681199	103687920	-1
Set_004	Gene_018	513253	EDEM2	ENSBTAG00000003815	ENSBTAT00000004969	NM_001101085	ER degradation enhancing alpha-mannosidase like protein 2 [Source:VGNC Symbol;Acc:VGNC:28323]	13	64392791	64420836	-1
Set_004	Gene_019	281094	CSF1	ENSBTAG00000000283	ENSBTAT00000000353	NM_174026	colony stimulating factor 1 [Source:VGNC Symbol;Acc:VGNC:27753]	3	33488957	33509479	-1
Set_004	Gene_020	515269	SPG7	ENSBTAG00000012041	ENSBTAT00000032500	NM_001102022	SPG7, paraplegin matrix AAA peptidase subunit [Source:VGNC Symbol;Acc:VGNC:35209]	18	14463306	14484611	1
Set_004	Gene_021	527056	RNF6	ENSBTAG00000005318	ENSBTAT00000047301	NM_001098062	ring finger protein 6 [Source:VGNC Symbol;Acc:VGNC:34071]	12	33169752	33179038	1
Set_004	Gene_022	516578	TBP	ENSBTAG00000007686	ENSBTAT00000038996	NM_001075742	TATA-box binding protein [Source:NCBI gene;Acc:516578]	9	104096728	104106442	1
Set_004	Gene_023	518370	TBC1D23	ENSBTAG00000015010	ENSBTAT00000032386		TBC1 domain family member 23 [Source:VGNC Symbol;Acc:VGNC:35638]	1	44554751	44611092	1
Set_004	Gene_024	613479	GTF2A2	ENSBTAG00000010298	ENSBTAT00000013602	NM_001037619	general transcription factor IIA subunit 2 [Source:VGNC Symbol;Acc:VGNC:29692]	10	50582585	50614948	1
Set_004	Gene_025	NA	ZNF555	ENSBTAG00000008397	ENSBTAT00000011050		zinc finger protein 555 [Source:VGNC Symbol;Acc:VGNC:55316]	7	20847764	20853001	-1
Set_004	Gene_026	781625	PLXND1	ENSBTAG00000001814	ENSBTAT00000002375		plexin D1 [Source:VGNC Symbol;Acc:VGNC:33065]	22	56134781	56182636	1
Set_004	Gene_027	517903	RHBDF2	ENSBTAG00000003436	ENSBTAT00000004463		rhomboid 5 homolog 2 [Source:VGNC Symbol;Acc:VGNC:33934]	19	55249957	55274837	1
Set_004	Gene_028	538746	SLC45A2	ENSBTAG00000018235	ENSBTAT00000024272		solute carrier family 45 member 2 [Source:VGNC Symbol;Acc:VGNC:34881]	20	39789136	39827963	1
Set_004	Gene_029	281839	ICAM1	ENSBTAG00000010303	ENSBTAT00000013608	NM_174348	intercellular adhesion molecule 1 [Source:VGNC Symbol;Acc:VGNC:50197]	7	14813729	14824411	1
Set_004	Gene_030	783291	ITPRIPL2	ENSBTAG00000032503	ENSBTAT00000046098		ITPRIP like 2 [Source:VGNC Symbol;Acc:VGNC:30351]	25	16864860	16866458	-1
Set_004	Gene_031	789726	SHISA7	ENSBTAG00000008932	ENSBTAT00000083303		shisa family member 7 [Source:VGNC Symbol;Acc:VGNC:52247]	18	62066756	62073582	1
Set_004	Gene_032	768075	RCL1	ENSBTAG00000018667	ENSBTAT00000073600		RNA terminal phosphate cyclase like 1 [Source:VGNC Symbol;Acc:VGNC:33830]	8	39548658	39743532	-1
Set_004	Gene_033	539462	MPZ	ENSBTAG00000033835	ENSBTAT00000048021	NM_001316359	myelin protein zero [Source:VGNC Symbol;Acc:VGNC:31591]	3	8211117	8216095	1
Set_004	Gene_034	534579	TFDP1	ENSBTAG00000019645	ENSBTAT00000026175	NM_001076029	transcription factor Dp-1 [Source:NCBI gene;Acc:534579]	12	86721195	86738806	1
Set_004	Gene_035	NA		ENSBTAG00000050198	ENSBTAT00000084498			1	89468342	89507742	1
Set_004	Gene_036	516022		ENSBTAG00000050278	ENSBTAT00000053537		olfactory receptor, family 8, subfamily G, member 5 [Source:NCBI gene;Acc:516022]	29	27537272	27538207	1
Set_004	Gene_037	508431	ITCH	ENSBTAG00000000308	ENSBTAT00000000397	NM_001082428	itchy E3 ubiquitin protein ligase [Source:VGNC Symbol;Acc:VGNC:30307]	13	63816189	63881729	1
Set_004	Gene_038	NA	RF00001	ENSBTAG00000036908	ENSBTAT00000051408			X	17312824	17312942	-1
Set_004	Gene_039	NA		ENSBTAG00000053344	ENSBTAT00000078236			26	32978382	32978939	1
Set_004	Gene_040	100301114	PRPF40A	ENSBTAG00000048151	ENSBTAT00000064349		pre-mRNA processing factor 40 homolog A [Source:VGNC Symbol;Acc:VGNC:33379]	2	43470324	43528516	1
Set_004	Gene_041	540568	ATP2A2	ENSBTAG00000001398	ENSBTAT00000001838	NM_001191430	ATPase sarcoplasmic/endoplasmic reticulum Ca2+ transporting 2 [Source:VGNC Symbol;Acc:VGNC:26291]	17	54211210	54267854	1
Set_004	Gene_042	767950	MGC133647	ENSBTAG00000019199	ENSBTAT00000025556	NM_001077021	uncharacterized protein MGC133647 [Source:NCBI gene;Acc:767950]	24	34982939	34997826	1
Set_004	Gene_043	538021	DAGLB	ENSBTAG00000009236	ENSBTAT00000012173	NM_001083487	diacylglycerol lipase beta [Source:VGNC Symbol;Acc:VGNC:27873]	25	38297751	38321662	-1
Set_004	Gene_044	NA	RF00001	ENSBTAG00000036743	ENSBTAT00000051243			25	18693654	18693772	1
Set_004	Gene_045	520625	SLC44A4	ENSBTAG00000005675	ENSBTAT00000045367	NM_001083442	solute carrier family 44 member 4 [Source:VGNC Symbol;Acc:VGNC:34878]	23	27480743	27494225	1
Set_004	Gene_046	100313178	bta-mir-2284c	ENSBTAG00000044561	ENSBTAT00000061994		bta-mir-2284c [Source:miRBase;Acc:MI0011415]	23	35873412	35873491	1
Set_004	Gene_047	NA	RF00156	ENSBTAG00000044361	ENSBTAT00000061794			2	85936687	85936811	1
Set_004	Gene_048	112448348	RF00026	ENSBTAG00000048819	ENSBTAT00000071905			1	139576258	139576364	-1
Set_004	Gene_049	539509	RXFP3	ENSBTAG00000039929	ENSBTAT00000055041		relaxin family peptide receptor 3 [Source:NCBI gene;Acc:539509]	20	39835996	39837372	-1
Set_004	Gene_050	785370		ENSBTAG00000052947	ENSBTAT00000067378		phosphatidylcholine translocator ABCB4 [Source:NCBI gene;Acc:785370]	4	32400488	32419402	-1
Set_004	Gene_051	NA		ENSBTAG00000005315	ENSBTAT00000006990			2	111044032	111044777	-1
Set_004	Gene_052	280728	AVP	ENSBTAG00000008027	ENSBTAT00000010555	NM_176854	arginine vasopressin [Source:VGNC Symbol;Acc:VGNC:26356]	13	52102351	52104369	1
Set_004	Gene_053	518907	KBTBD11	ENSBTAG00000018284	ENSBTAT00000024334		kelch repeat and BTB domain containing 11 [Source:VGNC Symbol;Acc:VGNC:30412]	27	1429185	1431110	1
Set_004	Gene_054	520694	LINGO1	ENSBTAG00000023147	ENSBTAT00000031490		leucine rich repeat and Ig domain containing 1 [Source:VGNC Symbol;Acc:VGNC:30899]	21	32764174	32782312	-1
Set_004	Gene_055	NA	RF02200	ENSBTAG00000054553	ENSBTAT00000082567			17	67406547	67406703	1
Set_004	Gene_056	782628		ENSBTAG00000046015	ENSBTAT00000063461		keratin-associated protein 12-2 [Source:NCBI gene;Acc:782628]	1	141872518	141872892	1
Set_004	Gene_057	516921	EML6	ENSBTAG00000011101	ENSBTAT00000014742	NM_001192457	echinoderm microtubule associated protein like 6 [Source:VGNC Symbol;Acc:VGNC:28480]	11	37435497	37719952	1
Set_004	Gene_058	512451	ZHX3	ENSBTAG00000017594	ENSBTAT00000023393		zinc fingers and homeoboxes 3 [Source:VGNC Symbol;Acc:VGNC:37184]	13	69832957	69940039	-1
Set_004	Gene_059	NA		ENSBTAG00000048336	ENSBTAT00000079381			3	16010350	16011223	1
Set_004	Gene_060	NA		ENSBTAG00000047485	ENSBTAT00000064488			23	21697125	21701280	1
Set_004	Gene_061	NA	RF01977	ENSBTAG00000048509	ENSBTAT00000081571			4	68942165	68942222	-1
Set_004	Gene_062	515918	CA8	ENSBTAG00000017529	ENSBTAT00000023308	NM_001083690	carbonic anhydrase 8 [Source:VGNC Symbol;Acc:VGNC:26658]	14	25956319	26038333	-1
Set_004	Gene_063	112444232	RF00026	ENSBTAG00000055291	ENSBTAT00000074613			24	61648047	61648153	-1
Set_004	Gene_064	539241	BLA-DQB	ENSBTAG00000019588	ENSBTAT00000026100	NM_001034668	MHC class II antigen [Source:NCBI gene;Acc:539241]	23	25672686	25680506	1
Set_004	Gene_065	511427	KRI1	ENSBTAG00000010729	ENSBTAT00000014206	NM_001110072	KRI1 homolog [Source:VGNC Symbol;Acc:VGNC:30713]	7	15061317	15070938	-1
Set_004	Gene_066	509186	TKTL2	ENSBTAG00000008947	ENSBTAT00000011778	NM_001046025	transketolase like 2 [Source:VGNC Symbol;Acc:VGNC:35886]	6	2168490	2171062	1
Set_004	Gene_067	533764	RPE	ENSBTAG00000054647	ENSBTAT00000082970	NM_001098079	ribulose-5-phosphate-3-epimerase [Source:NCBI gene;Acc:533764]	2	97826470	97847706	1
Set_004	Gene_068	NA		ENSBTAG00000049844	ENSBTAT00000064283			X	38448301	38449711	1
Set_004	Gene_069	407213	SFTPA1	ENSBTAG00000023032	ENSBTAT00000068360		surfactant protein A1 [Source:NCBI gene;Acc:407213]	28	35645847	35650079	-1
Set_004	Gene_070	530516	KBTBD8	ENSBTAG00000011081	ENSBTAT00000014711	NM_001192696	kelch repeat and BTB domain containing 8 [Source:VGNC Symbol;Acc:VGNC:30418]	22	34462620	34474389	-1
Set_004	Gene_071	NA		ENSBTAG00000048904	ENSBTAT00000067854			4	105690050	105692446	1
Set_004	Gene_072	785207		ENSBTAG00000048570	ENSBTAT00000077579		olfactory receptor 52K2 [Source:NCBI gene;Acc:785207]	15	49043281	49044270	-1
Set_004	Gene_073	NA	TRPM6	ENSBTAG00000033076	ENSBTAT00000046932		transient receptor potential cation channel subfamily M member 6 [Source:VGNC Symbol;Acc:VGNC:36392]	8	50870453	50910988	-1
Set_004	Gene_074	281537	TNP1	ENSBTAG00000019003	ENSBTAT00000025292	NM_174199	transition protein 1 [Source:VGNC Symbol;Acc:VGNC:36197]	2	104859771	104860388	-1
Set_004	Gene_075	538426	DNAJB1	ENSBTAG00000016874	ENSBTAT00000036270	NM_001033763	DnaJ heat shock protein family (Hsp40) member B1 [Source:NCBI gene;Acc:538426]	7	11269404	11273083	1
Set_004	Gene_076	286790	RPL10	ENSBTAG00000007454	ENSBTAT00000085658		ribosomal protein L10 [Source:NCBI gene;Acc:286790]	X	37450195	37453599	1
Set_004	Gene_077	515088	GIT1	ENSBTAG00000012040	ENSBTAT00000073530		GIT ArfGAP 1 [Source:VGNC Symbol;Acc:VGNC:29368]	19	20829405	20843830	-1
Set_004	Gene_078	100141142	SYCE2	ENSBTAG00000016213	ENSBTAT00000021575		synaptonemal complex central element protein 2 [Source:VGNC Symbol;Acc:VGNC:35505]	7	12641076	12658137	1
Set_004	Gene_079	616355	C7H19orf24	ENSBTAG00000046542	ENSBTAT00000064761	NM_001206241	chromosome 7 C19orf24 homolog [Source:VGNC Symbol;Acc:VGNC:52726]	7	43713177	43716027	1
Set_004	Gene_080	NA		ENSBTAG00000053331	ENSBTAT00000068835			19	14092556	14108737	-1
Set_004	Gene_081	767601	BCL2L2	ENSBTAG00000019692	ENSBTAT00000026248	NM_001076533	BCL2 like 2 [Source:VGNC Symbol;Acc:VGNC:55105]	10	21602048	21606907	-1
Set_004	Gene_082	615211	MTF2	ENSBTAG00000001393	ENSBTAT00000001831	NM_001046556	metal response element binding transcription factor 2 [Source:VGNC Symbol;Acc:VGNC:31723]	3	50331720	50402638	-1
Set_004	Gene_083	NA		ENSBTAG00000051301	ENSBTAT00000077274			3	1944383	1947012	-1
Set_004	Gene_084	NA		ENSBTAG00000052926	ENSBTAT00000073206			9	94487698	94490833	-1
Set_004	Gene_085	534731	EPHB1	ENSBTAG00000015377	ENSBTAT00000020455	NM_001192829	EPH receptor B1 [Source:VGNC Symbol;Acc:VGNC:50173]	1	134087026	134553600	-1
Set_004	Gene_086	617406		ENSBTAG00000053741	ENSBTAT00000029986		serpin peptidase inhibitor, clade B (ovalbumin), member 6-like [Source:NCBI gene;Acc:617406]	23	50682024	50690498	-1
Set_004	Gene_087	768037	TNFRSF19	ENSBTAG00000018300	ENSBTAT00000085329		TNF receptor superfamily member 19 [Source:VGNC Symbol;Acc:VGNC:53840]	12	34421457	34509717	-1
Set_004	Gene_088	107131476		ENSBTAG00000051005	ENSBTAT00000004039		vomeronasal type-1 receptor 4-like [Source:NCBI gene;Acc:107131476]	18	63361023	63361931	1
Set_004	Gene_089	524246	EPHX4	ENSBTAG00000005805	ENSBTAT00000077881	NM_001075855	epoxide hydrolase 4 [Source:VGNC Symbol;Acc:VGNC:28544]	3	51334931	51372381	-1
Set_004	Gene_090	539643	VCPIP1	ENSBTAG00000006695	ENSBTAT00000008802		valosin containing protein interacting protein 1 [Source:VGNC Symbol;Acc:VGNC:53883]	14	30874819	30899394	-1
Set_004	Gene_091	100140494	LRMP	ENSBTAG00000019711	ENSBTAT00000026270		lymphoid restricted membrane protein [Source:NCBI gene;Acc:100140494]	5	84887467	84938013	-1
Set_004	Gene_092	445364	IFT20	ENSBTAG00000008110	ENSBTAT00000010668	NM_001013603	intraflagellar transport 20 [Source:VGNC Symbol;Acc:VGNC:50160]	19	19814952	19821909	-1
Set_004	Gene_093	NA	RF00001	ENSBTAG00000045322	ENSBTAT00000062755			21	40189964	40190081	1
Set_004	Gene_094	618568	RAPGEFL1	ENSBTAG00000015232	ENSBTAT00000020265	NM_001205407	Rap guanine nucleotide exchange factor like 1 [Source:VGNC Symbol;Acc:VGNC:33727]	19	40458896	40472295	1
Set_004	Gene_095	112449412	RF00619	ENSBTAG00000045070	ENSBTAT00000062503		RNA, U6atac small nuclear 39, pseudogene [Source:HGNC Symbol;Acc:HGNC:46938]	13	11983252	11983380	-1
Set_004	Gene_096	112446493	RF00275	ENSBTAG00000043287	ENSBTAT00000060279			4	68490451	68490521	1
Set_004	Gene_097	512693	POLDIP3	ENSBTAG00000016511	ENSBTAT00000021952	NM_001103183	DNA polymerase delta interacting protein 3 [Source:VGNC Symbol;Acc:VGNC:33117]	5	113447522	113470655	-1
Set_004	Gene_098	526572	APC2	ENSBTAG00000015433	ENSBTAT00000035399		APC2, WNT signaling pathway regulator [Source:VGNC Symbol;Acc:VGNC:26006]	7	43851930	43875954	1
Set_004	Gene_099	NA	MIR22	ENSBTAG00000029930	ENSBTAT00000042309		microRNA 22 [Source:HGNC Symbol;Acc:HGNC:31599]	19	22811560	22811660	-1
Set_004	Gene_100	514933	EBI3	ENSBTAG00000012829	ENSBTAT00000017046	NM_001100365	Epstein-Barr virus induced 3 [Source:NCBI gene;Acc:514933]	7	19814211	19819636	-1
Set_004	Gene_101	444879	ST3GAL2	ENSBTAG00000054680	ENSBTAT00000086395	NM_001002892	ST3 beta-galactoside alpha-2,3-sialyltransferase 2 [Source:NCBI gene;Acc:444879]	18	1710164	1725460	1
Set_004	Gene_102	102466611	bta-mir-2284y-1	ENSBTAG00000044553	ENSBTAT00000061986		bta-mir-2284y-1 [Source:miRBase;Acc:MI0021125]	11	73169115	73169238	1
Set_004	Gene_103	516473	EEF1D	ENSBTAG00000014643	ENSBTAT00000078970		eukaryotic translation elongation factor 1 delta [Source:VGNC Symbol;Acc:VGNC:53861]	14	1113551	1126356	1
Set_004	Gene_104	528057	CSGALNACT1	ENSBTAG00000004613	ENSBTAT00000080130		chondroitin sulfate N-acetylgalactosaminyltransferase 1 [Source:VGNC Symbol;Acc:VGNC:27759]	27	37958250	38233860	1
Set_004	Gene_105	506115	CTDSP2	ENSBTAG00000016508	ENSBTAT00000038164	NM_001045935	CTD small phosphatase 2 [Source:VGNC Symbol;Acc:VGNC:27791]	5	55634355	55656768	1
Set_004	Gene_106	NA		ENSBTAG00000053326	ENSBTAT00000084824			27	6610757	6610927	1
Set_004	Gene_107	534101	BMPER	ENSBTAG00000010866	ENSBTAT00000046295	NM_001077997	BMP binding endothelial regulator [Source:VGNC Symbol;Acc:VGNC:26523]	4	62664288	62917005	-1
Set_004	Gene_108	112444971	RF00494	ENSBTAG00000042711	ENSBTAT00000059703			29	1103308	1103387	-1
Set_004	Gene_109	NA		ENSBTAG00000050000	ENSBTAT00000086332			29	41175058	41177115	-1
Set_004	Gene_110	282053	RPS3A	ENSBTAG00000009908	ENSBTAT00000013079	NM_001034038	ribosomal protein S3A [Source:VGNC Symbol;Acc:VGNC:55759]	17	6717402	6722090	-1
Set_004	Gene_111	514387	TRIP12	ENSBTAG00000021653	ENSBTAT00000038151	NM_001191203	thyroid hormone receptor interactor 12 [Source:VGNC Symbol;Acc:VGNC:36358]	2	117811397	117918447	-1
Set_004	Gene_112	NA		ENSBTAG00000053974	ENSBTAT00000078119			2	18150862	18155765	1
Set_004	Gene_113	337906	PAG12	ENSBTAG00000019173	ENSBTAT00000025567	NM_176622	pregnancy-associated glycoprotein 12 [Source:NCBI gene;Acc:337906]	29	37655999	37666176	1
Set_004	Gene_114	112448604	RF00139	ENSBTAG00000048586	ENSBTAT00000060319			10	69696821	69696952	-1
Set_004	Gene_115	520924	NUP205	ENSBTAG00000011127	ENSBTAT00000044609		nucleoporin 205 [Source:VGNC Symbol;Acc:VGNC:32355]	4	99335497	99461007	1
Set_004	Gene_116	540644	SAMD8	ENSBTAG00000008619	ENSBTAT00000011368		sterile alpha motif domain containing 8 [Source:VGNC Symbol;Acc:VGNC:34276]	28	30882776	30936255	1
Set_004	Gene_117	613898	CENPA	ENSBTAG00000023938	ENSBTAT00000032931	NM_001205380	centromere protein A [Source:NCBI gene;Acc:613898]	11	72792306	72798612	-1
Set_004	Gene_118	112448590	RF00026	ENSBTAG00000053659	ENSBTAT00000076150			10	80747987	80748093	-1
Set_004	Gene_119	504206	PCDHB1	ENSBTAG00000037885	ENSBTAT00000052339		protocadherin beta 1 [Source:NCBI gene;Acc:504206]	7	52169913	52172369	1
Set_004	Gene_120	NA		ENSBTAG00000048686	ENSBTAT00000055838			11	93492129	93493070	1
Set_004	Gene_121	100336926	MAML1	ENSBTAG00000050347	ENSBTAT00000078064		mastermind like transcriptional coactivator 1 [Source:NCBI gene;Acc:100336926]	7	1544461	1605780	-1
Set_004	Gene_122	NA	RF02248	ENSBTAG00000049988	ENSBTAT00000087234			11	27359687	27359761	1
Set_004	Gene_123	531907	EXOC5	ENSBTAG00000013042	ENSBTAT00000017336	NM_001192711	exocyst complex component 5 [Source:VGNC Symbol;Acc:VGNC:28649]	10	69619265	69671092	-1
Set_004	Gene_124	100313417	bta-mir-2284p	ENSBTAG00000044628	ENSBTAT00000062061		bta-mir-2284p [Source:miRBase;Acc:MI0011378]	19	62858782	62858858	1
Set_004	Gene_125	787839	MSL1	ENSBTAG00000010375	ENSBTAT00000043093		male specific lethal 1 homolog [Source:VGNC Symbol;Acc:VGNC:31698]	19	40417962	40428347	1
Set_004	Gene_126	539944	KRT84	ENSBTAG00000047872	ENSBTAT00000021519	NM_001192335	keratin 84 [Source:VGNC Symbol;Acc:VGNC:30744]	5	27505582	27513625	1
Set_004	Gene_127	507199	MVB12A	ENSBTAG00000003914	ENSBTAT00000005111	NM_001034283	multivesicular body subunit 12A [Source:VGNC Symbol;Acc:VGNC:31766]	7	5683952	5688015	-1
Set_004	Gene_128	100337106	GRID1	ENSBTAG00000019623	ENSBTAT00000026142		glutamate ionotropic receptor delta type subunit 1 [Source:VGNC Symbol;Acc:VGNC:55986]	28	40404330	41087444	-1
Set_004	Gene_129	NA		ENSBTAG00000048725	ENSBTAT00000067197			3	15970920	15971978	-1
Set_004	Gene_130	767928	RBPJ	ENSBTAG00000003602	ENSBTAT00000004696	NM_001077001	recombination signal binding protein for immunoglobulin kappa J region [Source:VGNC Symbol;Acc:VGNC:53775]	6	45773063	45883952	1
Set_004	Gene_131	529412	CALHM4	ENSBTAG00000033535	ENSBTAT00000008602	NM_001101133	calcium homeostasis modulator family member 4 [Source:VGNC Symbol;Acc:VGNC:26710]	9	34163752	34171792	-1
Set_004	Gene_132	539318	OXGR1	ENSBTAG00000021345	ENSBTAT00000035454		oxoglutarate receptor 1 [Source:VGNC Symbol;Acc:VGNC:32510]	12	74192308	74193321	-1
Set_004	Gene_133	NA	ZNF446	ENSBTAG00000038534	ENSBTAT00000056703		zinc finger protein 446 [Source:VGNC Symbol;Acc:VGNC:52289]	18	65720236	65722871	1
Set_004	Gene_134	112446143	RF00003	ENSBTAG00000045712	ENSBTAT00000065765		U1 spliceosomal RNA [Source:NCBI gene;Acc:112446143]	3	21015334	21015489	1
Set_004	Gene_135	NA		ENSBTAG00000049764	ENSBTAT00000085344			22	45801718	45842783	-1
Set_004	Gene_136	514087	SUN5	ENSBTAG00000013056	ENSBTAT00000017354	NM_001046165	Sad1 and UNC84 domain containing 5 [Source:VGNC Symbol;Acc:VGNC:35476]	13	62276784	62297291	-1
Set_004	Gene_137	100295610	MUC13	ENSBTAG00000010382	ENSBTAT00000013702		mucin 13, cell surface associated [Source:VGNC Symbol;Acc:VGNC:31758]	1	69332534	69349823	-1
Set_004	Gene_138	782442	GPR17	ENSBTAG00000006261	ENSBTAT00000008214	NM_001082470	G protein-coupled receptor 17 [Source:VGNC Symbol;Acc:VGNC:29568]	2	4872953	4878988	-1
Set_004	Gene_139	317704	SLCO2B1	ENSBTAG00000015596	ENSBTAT00000020716	NM_174843	solute carrier organic anion transporter family member 2B1 [Source:VGNC Symbol;Acc:VGNC:34952]	15	54375514	54427957	1
Set_004	Gene_140	506626	RTN4IP1	ENSBTAG00000017554	ENSBTAT00000023334		reticulon 4 interacting protein 1 [Source:VGNC Symbol;Acc:VGNC:34205]	9	43328996	43454082	1
Set_004	Gene_141	538402	FAM81A	ENSBTAG00000014699	ENSBTAT00000019564		family with sequence similarity 81 member A [Source:VGNC Symbol;Acc:VGNC:28830]	10	50806869	50869445	-1
Set_004	Gene_142	112445270	RF01210	ENSBTAG00000045405	ENSBTAT00000062838			X	127204870	127204974	-1
Set_004	Gene_143	NA		ENSBTAG00000019919	ENSBTAT00000083746			26	50822833	50865778	1
Set_004	Gene_144	101906103	MGAT2	ENSBTAG00000033891	ENSBTAT00000048092		mannosyl (alpha-1,6-)-glycoprotein beta-1,2-N-acetylglucosaminyltransferase [Source:VGNC Symbol;Acc:VGNC:54626]	10	42659741	42661081	1
Set_004	Gene_145	NA		ENSBTAG00000030953	ENSBTAT00000052387			8	91601787	91603159	-1
Set_004	Gene_146	NA		ENSBTAG00000052596	ENSBTAT00000072056			14	9228419	9241527	1
Set_004	Gene_147	100299503		ENSBTAG00000047341	ENSBTAT00000063811		THO complex subunit 2 [Source:NCBI gene;Acc:100299503]	1	114370080	114375211	-1
Set_004	Gene_148	112441932	RF00026	ENSBTAG00000043370	ENSBTAT00000060362		RNA, U6 small nuclear 431, pseudogene [Source:HGNC Symbol;Acc:HGNC:47394]	16	18566337	18566443	1
Set_004	Gene_149	NA		ENSBTAG00000049242	ENSBTAT00000079823			17	8988477	9006090	1
Set_004	Gene_150	525500	SDR16C6	ENSBTAG00000040321	ENSBTAT00000052250	NM_001099707	short chain dehydrogenase/reductase family 16C, member 6 [Source:NCBI gene;Acc:525500]	14	23475942	23502005	-1
Set_004	Gene_151	NA		ENSBTAG00000051872	ENSBTAT00000077598			7	75200529	75201578	-1
Set_004	Gene_152	613306	MIEF1	ENSBTAG00000017439	ENSBTAT00000081921		mitochondrial elongation factor 1 [Source:VGNC Symbol;Acc:VGNC:31467]	5	110930789	110943940	1
Set_004	Gene_153	100190915		ENSBTAG00000047830	ENSBTAT00000066096	NM_001168601	uncharacterized LOC100190915 [Source:NCBI gene;Acc:100190915]	3	83488340	83490482	-1
Set_004	Gene_154	618489	H2AFJ	ENSBTAG00000030503	ENSBTAT00000043046	NM_001078089	H2A histone family, member J [Source:NCBI gene;Acc:618489]	5	95136650	95137326	-1
Set_004	Gene_155	107131184	FRAS1	ENSBTAG00000010716	ENSBTAT00000080436		Fraser extracellular matrix complex subunit 1 [Source:NCBI gene;Acc:107131184]	6	92951310	93291875	1
Set_004	Gene_156	NA		ENSBTAG00000049379	ENSBTAT00000074097			11	104070662	104071668	1
Set_004	Gene_157	514474	TP53BP2	ENSBTAG00000012781	ENSBTAT00000016985		tumor protein p53 binding protein 2 [Source:VGNC Symbol;Acc:VGNC:36233]	16	27139848	27207478	-1
Set_004	Gene_158	615150		ENSBTAG00000049883	ENSBTAT00000030422		olfactory receptor 10H4 [Source:NCBI gene;Acc:615150]	7	7081038	7081988	-1
Set_004	Gene_159	NA		ENSBTAG00000054940	ENSBTAT00000080441			7	62897636	62897959	1
Set_004	Gene_160	535158	GRIN2C	ENSBTAG00000040042	ENSBTAT00000015137	NM_001206894	glutamate ionotropic receptor NMDA type subunit 2C [Source:VGNC Symbol;Acc:VGNC:29648]	19	56555365	56571477	1
Set_004	Gene_161	614773	ZFP36L1	ENSBTAG00000025434	ENSBTAT00000035742	NM_001101234	ZFP36 ring finger protein like 1 [Source:VGNC Symbol;Acc:VGNC:37163]	10	80614620	80620778	-1
Set_004	Gene_162	782317	C11H2orf73	ENSBTAG00000006861	ENSBTAT00000009010	NM_001101283	chromosome 11 C2orf73 homolog [Source:VGNC Symbol;Acc:VGNC:52620]	11	37035251	37061596	1
Set_004	Gene_163	280993	ALPI	ENSBTAG00000004519	ENSBTAT00000043359	NM_173987	alkaline phosphatase, intestinal [Source:NCBI gene;Acc:280993]	2	120096973	120100228	1
Set_004	Gene_164	287016	H2AFZ	ENSBTAG00000004428	ENSBTAT00000005802	NM_174809	H2A histone family, member Z [Source:NCBI gene;Acc:287016]	6	24736918	24739414	1
Set_004	Gene_165	790972	bta-mir-18b	ENSBTAG00000029973	ENSBTAT00000042352		bta-mir-18b [Source:miRBase;Acc:MI0004732]	X	17976170	17976244	-1
Set_004	Gene_166	539131	ADGRF2	ENSBTAG00000037687	ENSBTAT00000080743		adhesion G protein-coupled receptor F2 [Source:VGNC Symbol;Acc:VGNC:25662]	23	20706772	20740185	1
Set_004	Gene_167	NA		ENSBTAG00000013625	ENSBTAT00000018111			X	122314632	122315414	1
Set_004	Gene_168	616673		ENSBTAG00000046738	ENSBTAT00000065034		proline rich 23A [Source:NCBI gene;Acc:616673]	1	130057450	130058343	1
Set_004	Gene_169	100139125	MCF2L2	ENSBTAG00000010394	ENSBTAT00000013720		MCF.2 cell line derived transforming sequence-like 2 [Source:VGNC Symbol;Acc:VGNC:31303]	1	83653154	83911446	1
Set_004	Gene_170	NA		ENSBTAG00000049632	ENSBTAT00000086377			NKLS02002204.1	1604	86579	-1
Set_004	Gene_171	513195	CENPT	ENSBTAG00000006404	ENSBTAT00000008396	NM_001101969	centromere protein T [Source:VGNC Symbol;Acc:VGNC:27185]	18	35338638	35344538	-1
Set_004	Gene_172	NA	RF00003	ENSBTAG00000036959	ENSBTAT00000051459		RNA, U1 small nuclear 22, pseudogene [Source:HGNC Symbol;Acc:HGNC:41963]	17	26017890	26018062	-1
Set_004	Gene_173	NA		ENSBTAG00000039476	ENSBTAT00000033059			11	46637927	46648729	-1
Set_004	Gene_174	532553	GRIK3	ENSBTAG00000009269	ENSBTAT00000073656	NM_001206003	glutamate ionotropic receptor kainate type subunit 3 [Source:VGNC Symbol;Acc:VGNC:29644]	3	108832486	109076297	1
Set_004	Gene_175	526524		ENSBTAG00000032651	ENSBTAT00000046345	NM_001077969	FK506 binding protein 1A, 12kDa-like [Source:NCBI gene;Acc:526524]	11	27914690	27915291	1
Set_004	Gene_176	NA		ENSBTAG00000053611	ENSBTAT00000073077			1	67323374	67328427	-1
Set_004	Gene_177	112446982		ENSBTAG00000044154	ENSBTAT00000061561		keratin-associated protein 6-2-like [Source:NCBI gene;Acc:112446982]	1	4957550	4957843	-1
Set_004	Gene_178	523130		ENSBTAG00000010385	ENSBTAT00000013705		C1GALT1-specific chaperone 1 [Source:NCBI gene;Acc:523130]	1	116318277	116319233	-1
Set_004	Gene_179	539045	WDR89	ENSBTAG00000008815	ENSBTAT00000011607	NM_001034658	WD repeat domain 89 [Source:VGNC Symbol;Acc:VGNC:36925]	10	75839093	75886203	-1
Set_004	Gene_180	781474	LRRIQ1	ENSBTAG00000027900	ENSBTAT00000085005		leucine rich repeats and IQ motif containing 1 [Source:VGNC Symbol;Acc:VGNC:56221]	5	14559465	14897805	1
Set_004	Gene_181	789410	XRCC2	ENSBTAG00000030897	ENSBTAT00000043719	NM_001102354	X-ray repair cross complementing 2 [Source:VGNC Symbol;Acc:VGNC:37003]	4	115029143	115054271	-1
Set_004	Gene_182	NA		ENSBTAG00000053701	ENSBTAT00000082035			4	106030565	106040035	1
Set_004	Gene_183	515395	STK11IP	ENSBTAG00000038992	ENSBTAT00000056702		serine/threonine kinase 11 interacting protein [Source:VGNC Symbol;Acc:VGNC:35386]	2	107521189	107535476	1
Set_004	Gene_184	614014	ZNF512B	ENSBTAG00000011646	ENSBTAT00000039336		zinc finger protein 512B [Source:VGNC Symbol;Acc:VGNC:37291]	13	53879286	53887495	1
Set_004	Gene_185	513942	ZFP1	ENSBTAG00000000868	ENSBTAT00000001155		ZFP1 zinc finger protein [Source:VGNC Symbol;Acc:VGNC:37159]	18	2499180	2502934	1
Set_004	Gene_186	510741	PSMG3	ENSBTAG00000000050	ENSBTAT00000000055	NM_001046059	proteasome assembly chaperone 3 [Source:VGNC Symbol;Acc:VGNC:33480]	25	41386821	41387986	1
Set_004	Gene_187	NA		ENSBTAG00000055026	ENSBTAT00000085112			14	30146796	30162307	-1
Set_004	Gene_188	525263	GEMIN6	ENSBTAG00000015521	ENSBTAT00000020624	NM_001046278	gem nuclear organelle associated protein 6 [Source:VGNC Symbol;Acc:VGNC:29319]	11	21128704	21132566	1
Set_004	Gene_189	NA		ENSBTAG00000053097	ENSBTAT00000069493			7	4878614	4879670	-1
Set_004	Gene_190	505122	SPTA1	ENSBTAG00000000888	ENSBTAT00000061417	NM_001206588	spectrin alpha, erythrocytic 1 [Source:VGNC Symbol;Acc:VGNC:35250]	3	10996224	11091367	1
Set_004	Gene_191	NA		ENSBTAG00000053198	ENSBTAT00000080303			23	30101631	30103049	-1
Set_004	Gene_192	541216	RWDD1	ENSBTAG00000009689	ENSBTAT00000012779	NM_001034726	RWD domain containing 1 [Source:VGNC Symbol;Acc:VGNC:34225]	9	34136380	34154113	-1
Set_004	Gene_193	614429	YBX2	ENSBTAG00000009126	ENSBTAT00000071621		Y-box binding protein 2 [Source:VGNC Symbol;Acc:VGNC:37017]	19	26988948	26996169	-1
Set_004	Gene_194	112448626	RF01294	ENSBTAG00000044604	ENSBTAT00000062037			10	36746722	36746912	1
Set_004	Gene_195	532494	IGFALS	ENSBTAG00000033299	ENSBTAT00000047326	NM_001075963	insulin like growth factor binding protein acid labile subunit [Source:NCBI gene;Acc:532494]	25	1367532	1371456	-1
Set_004	Gene_196	NA		ENSBTAG00000052320	ENSBTAT00000085600			NKLS02001214.1	215336	215944	-1
Set_004	Gene_197	NA	SPATA48	ENSBTAG00000043955	ENSBTAT00000061416		spermatogenesis associated 48 [Source:VGNC Symbol;Acc:VGNC:49545]	4	5806257	5806697	-1
Set_004	Gene_198	281268	KRT5	ENSBTAG00000038384	ENSBTAT00000021456	NM_001008663	keratin 5 [Source:VGNC Symbol;Acc:VGNC:50405]	5	27366774	27373266	1
Set_004	Gene_199	NA		ENSBTAG00000014987	ENSBTAT00000019952			5	119145572	119146414	1
Set_004	Gene_200	337912	PAG17	ENSBTAG00000026016	ENSBTAT00000025601	NM_176627	pregnancy-associated glycoprotein 17 [Source:NCBI gene;Acc:337912]	29	39017997	39027018	-1
Set_004	Gene_201	618124		ENSBTAG00000054200	ENSBTAT00000064410	NM_001206664	olfactory receptor, family 1, subfamily E, member 2-like [Source:NCBI gene;Acc:618124]	19	24139174	24140118	-1
Set_004	Gene_202	509555	LRRC75A	ENSBTAG00000025078	ENSBTAT00000035050		leucine rich repeat containing 75A [Source:VGNC Symbol;Acc:VGNC:31028]	19	33175247	33209224	1
Set_004	Gene_203	112443894	RF00026	ENSBTAG00000046381	ENSBTAT00000065757			23	30131163	30131269	-1
Set_004	Gene_204	NA	SLC15A2	ENSBTAG00000033166	ENSBTAT00000001891		solute carrier family 15 member 2 [Source:HGNC Symbol;Acc:HGNC:10921]	1	66366134	66408044	1
Set_004	Gene_205	NA		ENSBTAG00000054652	ENSBTAT00000078989			12	48805738	49048411	-1
Set_004	Gene_206	781540	PTF1A	ENSBTAG00000047315	ENSBTAT00000062968		pancreas associated transcription factor 1a [Source:VGNC Symbol;Acc:VGNC:33498]	13	24204540	24206301	1
Set_004	Gene_207	493686	TLR7	ENSBTAG00000022161	ENSBTAT00000079344		toll like receptor 7 [Source:VGNC Symbol;Acc:VGNC:52836]	X	130769109	130786365	-1
Set_004	Gene_208	NA		ENSBTAG00000050258	ENSBTAT00000070212			1	40974784	41183078	1
Set_004	Gene_209	507311	DYNC2LI1	ENSBTAG00000013676	ENSBTAT00000084511	NM_001038051	dynein cytoplasmic 2 light intermediate chain 1 [Source:VGNC Symbol;Acc:VGNC:28274]	11	25999952	26038209	1
Set_004	Gene_210	523389		ENSBTAG00000053227	ENSBTAT00000076234		olfactory receptor 11A1 [Source:NCBI gene;Acc:523389]	23	29183684	29184643	1
Set_004	Gene_211	616843	PGLYRP4	ENSBTAG00000054765	ENSBTAT00000066655		peptidoglycan recognition protein 4 [Source:NCBI gene;Acc:616843]	3	17126512	17142568	1
Set_004	Gene_212	513107	STYXL1	ENSBTAG00000009461	ENSBTAT00000012447	NM_001101968	serine/threonine/tyrosine interacting like 1 [Source:VGNC Symbol;Acc:VGNC:35453]	25	34222298	34254742	-1
Set_004	Gene_213	780878	PHYHIPL	ENSBTAG00000010947	ENSBTAT00000031362	NM_001079798	phytanoyl-CoA 2-hydroxylase interacting protein like [Source:VGNC Symbol;Acc:VGNC:32851]	28	14786778	14882678	1
Set_004	Gene_214	NA		ENSBTAG00000054989	ENSBTAT00000075496			14	70551094	70555346	1
Set_004	Gene_215	112447598	RF00026	ENSBTAG00000044295	ENSBTAT00000061728		RNA, U6 small nuclear 1257, pseudogene [Source:HGNC Symbol;Acc:HGNC:48220]	7	75484969	75485076	-1
Set_004	Gene_216	NA	bta-mir-7857-2	ENSBTAG00000050370	ENSBTAT00000077693		bta-mir-7857-2 [Source:miRBase;Acc:MI0032928]	23	31129228	31129314	-1
Set_004	Gene_217	505540	MAMSTR	ENSBTAG00000011617	ENSBTAT00000015429	NM_001195011	MEF2 activating motif and SAP domain containing transcriptional regulator [Source:VGNC Symbol;Acc:VGNC:31160]	18	55352451	55358245	-1
Set_004	Gene_218	516135	SLC2A10	ENSBTAG00000002942	ENSBTAT00000003829	NM_001192439	solute carrier family 2 member 10 [Source:VGNC Symbol;Acc:VGNC:34797]	13	75368025	75380832	1
Set_004	Gene_219	527418	CBL	ENSBTAG00000006817	ENSBTAT00000072559		Cbl proto-oncogene [Source:VGNC Symbol;Acc:VGNC:26808]	15	29787170	29878434	1
Set_004	Gene_220	102466868	bta-mir-2284ab	ENSBTAG00000051450	ENSBTAT00000071540		bta-mir-2284ab [Source:miRBase;Acc:MI0025532]	6	102017883	102017942	1
Set_004	Gene_221	510780	TOMM22	ENSBTAG00000010157	ENSBTAT00000013405	NM_001100335	translocase of outer mitochondrial membrane 22 [Source:VGNC Symbol;Acc:VGNC:49064]	5	110314071	110316041	1
Set_004	Gene_222	102465280	bta-mir-2284y-5	ENSBTAG00000051839	ENSBTAT00000081508		bta-mir-2284y-5 [Source:miRBase;Acc:MI0022303]	2	110378162	110378250	1
Set_004	Gene_223	509963	ANGPTL4	ENSBTAG00000002473	ENSBTAT00000003204	NM_001046043	angiopoietin like 4 [Source:VGNC Symbol;Acc:VGNC:25893]	7	17005585	17012660	1
Set_004	Gene_224	513220	MKI67	ENSBTAG00000002444	ENSBTAT00000003173		marker of proliferation Ki-67 [Source:VGNC Symbol;Acc:VGNC:55960]	26	47507654	47537887	-1
Set_004	Gene_225	100313196	bta-mir-2408	ENSBTAG00000044859	ENSBTAT00000062292		bta-mir-2408 [Source:miRBase;Acc:MI0011451]	29	44875074	44875134	-1
Set_004	Gene_226	NA		ENSBTAG00000049030	ENSBTAT00000067117			11	104152769	104157310	-1
Set_004	Gene_227	523746	RPS6KA4	ENSBTAG00000039153	ENSBTAT00000020910	NM_001191400	ribosomal protein S6 kinase A4 [Source:VGNC Symbol;Acc:VGNC:34143]	29	42647702	42661484	1
Set_004	Gene_228	504851	BOK	ENSBTAG00000008711	ENSBTAT00000011478	NM_001098868	BCL2 family apoptosis regulator BOK [Source:VGNC Symbol;Acc:VGNC:26538]	3	120646406	120658685	1
Set_004	Gene_229	540438	STOML1	ENSBTAG00000015772	ENSBTAT00000020941	NM_001192431	stomatin like 1 [Source:VGNC Symbol;Acc:VGNC:35410]	21	34633182	34641526	1
Set_004	Gene_230	507367	PDK4	ENSBTAG00000014069	ENSBTAT00000038879	NM_001101883	pyruvate dehydrogenase kinase 4 [Source:VGNC Symbol;Acc:VGNC:32706]	4	12881889	12895362	-1
Set_004	Gene_231	104968452	IL4I1	ENSBTAG00000005766	ENSBTAT00000007580		interleukin 4 induced 1 [Source:VGNC Symbol;Acc:VGNC:30162]	18	56235067	56239827	-1
Set_004	Gene_232	508907	PARS2	ENSBTAG00000040313	ENSBTAT00000052546		prolyl-tRNA synthetase 2, mitochondrial [Source:VGNC Symbol;Acc:VGNC:49561]	3	91528851	91530803	1
Set_004	Gene_233	338034	MYBL1	ENSBTAG00000011981	ENSBTAT00000015897	NM_176635	MYB proto-oncogene like 1 [Source:VGNC Symbol;Acc:VGNC:31778]	14	30827578	30862362	-1
Set_004	Gene_234	NA		ENSBTAG00000005146	ENSBTAT00000076472			23	28525598	28527983	-1
Set_004	Gene_235	533126	TCAF1	ENSBTAG00000002554	ENSBTAT00000057182	NM_001099054	TRPM8 channel associated factor 1 [Source:VGNC Symbol;Acc:VGNC:35676]	4	107019305	107070624	-1
Set_004	Gene_236	282030	RAB3B	ENSBTAG00000005337	ENSBTAT00000007019	NM_174447	RAB3B, member RAS oncogene family [Source:VGNC Symbol;Acc:VGNC:33650]	3	94334017	94401951	1
Set_004	Gene_237	614170	DCAF17	ENSBTAG00000007683	ENSBTAT00000064596	NM_001191489	DDB1 and CUL4 associated factor 17 [Source:VGNC Symbol;Acc:VGNC:27904]	2	25003233	25029169	-1
Set_004	Gene_238	NA		ENSBTAG00000054435	ENSBTAT00000074535			NKLS02000318.1	2163	5671	1
Set_004	Gene_239	535290	MRPS28	ENSBTAG00000001302	ENSBTAT00000001718	NM_001046401	mitochondrial ribosomal protein S28 [Source:VGNC Symbol;Acc:VGNC:31668]	14	43120078	43222183	-1
Set_004	Gene_240	524491	CUX2	ENSBTAG00000008571	ENSBTAT00000029615	NM_001192597	cut like homeobox 2 [Source:VGNC Symbol;Acc:VGNC:27840]	17	54818687	55096432	1
Set_004	Gene_241	NA		ENSBTAG00000053961	ENSBTAT00000079612			25	18351312	18351563	-1
Set_004	Gene_242	505518	C15H11orf34	ENSBTAG00000015810	ENSBTAT00000020999	NM_001113538	chromosome 15 open reading frame, human C11orf34 [Source:NCBI gene;Acc:505518]	15	22642103	22654247	-1
Set_004	Gene_243	NA		ENSBTAG00000050688	ENSBTAT00000077112			24	560019	562959	-1
Set_004	Gene_244	509184		ENSBTAG00000039886	ENSBTAT00000085883		transmembrane emp24 domain-containing protein 9 [Source:NCBI gene;Acc:509184]	7	39087284	39091161	-1
Set_004	Gene_245	509302	DNAJC21	ENSBTAG00000015648	ENSBTAT00000020793	NM_001192218	DnaJ heat shock protein family (Hsp40) member C21 [Source:NCBI gene;Acc:509302]	20	39183189	39214779	-1
Set_004	Gene_246	539432	EPC2	ENSBTAG00000018581	ENSBTAT00000024730	NM_001192242	enhancer of polycomb homolog 2 [Source:VGNC Symbol;Acc:VGNC:28528]	2	47420198	47547292	-1
Set_004	Gene_247	508619	IFNGR1	ENSBTAG00000012544	ENSBTAT00000016650	NM_001035063	interferon gamma receptor 1 [Source:VGNC Symbol;Acc:VGNC:30058]	9	75081985	75106375	-1
Set_004	Gene_248	509641		ENSBTAG00000036175	ENSBTAT00000023382		olfactory receptor 7A17 [Source:NCBI gene;Acc:509641]	7	8430865	8431788	-1
Set_004	Gene_249	NA		ENSBTAG00000050524	ENSBTAT00000082860			21	63927109	63950331	-1
Set_004	Gene_250	509502	PTCD3	ENSBTAG00000006482	ENSBTAT00000008498	NM_001046034	pentatricopeptide repeat domain 3 [Source:VGNC Symbol;Acc:VGNC:33491]	11	48727826	48759022	-1
Set_004	Gene_001	538947	OR2H1	ENSBTAG00000027245	ENSBTAT00000039058		olfactory receptor, family 2, subfamily H, member 1 [Source:NCBI gene;Acc:538947]	23	29102226	29103164	-1
Set_005	Gene_002	NA	RF00017	ENSBTAG00000055172	ENSBTAT00000077134			10	42820456	42820754	-1
Set_005	Gene_003	539150	RAB5B	ENSBTAG00000014129	ENSBTAT00000018777	NM_001206191	RAB5B, member RAS oncogene family [Source:VGNC Symbol;Acc:VGNC:33659]	5	57321765	57337350	-1
Set_005	Gene_004	NA		ENSBTAG00000052599	ENSBTAT00000069501			1	146703936	146704817	1
Set_005	Gene_005	NA		ENSBTAG00000046944	ENSBTAT00000048097			19	14327135	14327967	-1
Set_005	Gene_006	615250	LYRM9	ENSBTAG00000033298	ENSBTAT00000055200	NM_001195029	LYR motif containing 9 [Source:NCBI gene;Acc:615250]	19	19487860	19503235	-1
Set_005	Gene_007	NA	bta-mir-12007	ENSBTAG00000052879	ENSBTAT00000071869		bta-mir-12007 [Source:miRBase;Acc:MI0038393]	7	26205647	26205722	-1
Set_005	Gene_008	NA		ENSBTAG00000055201	ENSBTAT00000067998			21	42435451	42435867	1
Set_005	Gene_009	280843	LPL	ENSBTAG00000012855	ENSBTAT00000017086	NM_001075120	lipoprotein lipase [Source:VGNC Symbol;Acc:VGNC:30969]	8	66989665	67016690	1
Set_005	Gene_010	404100	RAET1G	ENSBTAG00000039329	ENSBTAT00000057496	NM_205785	retinoic acid early transcript 1G [Source:NCBI gene;Acc:404100]	9	87236522	87247606	-1
Set_005	Gene_011	NA	TIGD7	ENSBTAG00000020209	ENSBTAT00000026914		tigger transposable element derived 7 [Source:VGNC Symbol;Acc:VGNC:54500]	25	2748254	2749894	-1
Set_005	Gene_012	112446910	RF00026	ENSBTAG00000042323	ENSBTAT00000059315			5	14767823	14767929	1
Set_005	Gene_013	515332	MYSM1	ENSBTAG00000013961	ENSBTAT00000080652	NM_001192408	Myb like, SWIRM and MPN domains 1 [Source:VGNC Symbol;Acc:VGNC:31847]	3	87349595	87391325	1
Set_005	Gene_014	615201	CLEC5A	ENSBTAG00000020453	ENSBTAT00000027255	NM_001206203	C-type lectin domain containing 5A [Source:VGNC Symbol;Acc:VGNC:27435]	4	105219646	105231958	-1
Set_005	Gene_015	NA		ENSBTAG00000048915	ENSBTAT00000077564			16	39460338	39461413	-1
Set_005	Gene_016	NA	RF02271	ENSBTAG00000050018	ENSBTAT00000078558			10	49501949	49502112	1
Set_005	Gene_017	NA	FAM200A	ENSBTAG00000051481	ENSBTAT00000073484		family with sequence similarity 200 member A [Source:HGNC Symbol;Acc:HGNC:25401]	25	36860238	36861968	1
Set_005	Gene_018	505805	LY6G6C	ENSBTAG00000000585	ENSBTAT00000000767	NM_001077856	lymphocyte antigen 6 family member G6C [Source:VGNC Symbol;Acc:VGNC:31090]	23	27589914	27592606	1
Set_005	Gene_019	504585	SPAG5	ENSBTAG00000013100	ENSBTAT00000017417	NM_001205549	sperm associated antigen 5 [Source:VGNC Symbol;Acc:VGNC:55873]	19	20034503	20053455	-1
Set_005	Gene_020	515366	PGM2L1	ENSBTAG00000000770	ENSBTAT00000001019	NM_001098984	phosphoglucomutase 2 like 1 [Source:VGNC Symbol;Acc:VGNC:32795]	15	53707096	53759583	-1
Set_005	Gene_021	518832	SVOPL	ENSBTAG00000031265	ENSBTAT00000044282	NM_001192500	SVOP like [Source:VGNC Symbol;Acc:VGNC:35499]	4	102292874	102379468	-1
Set_005	Gene_022	112448643	RF00026	ENSBTAG00000048855	ENSBTAT00000068691		RNA, U6 small nuclear 1 [Source:HGNC Symbol;Acc:HGNC:10227]	10	14686007	14686113	-1
Set_005	Gene_023	112449666	RF00156	ENSBTAG00000042171	ENSBTAT00000059163			14	64580622	64580756	-1
Set_005	Gene_024	514201	SMPD3	ENSBTAG00000009639	ENSBTAT00000012702	NM_001192363	sphingomyelin phosphodiesterase 3 [Source:VGNC Symbol;Acc:VGNC:35031]	18	35723889	35805738	-1
Set_005	Gene_025	782766		ENSBTAG00000054836	ENSBTAT00000079541		olfactory receptor, family 10, subfamily A, member 3 [Source:NCBI gene;Acc:782766]	15	44613375	44617249	1
Set_005	Gene_026	493777	SMCP	ENSBTAG00000005437	ENSBTAT00000007155	NM_001008417	sperm mitochondria associated cysteine rich protein [Source:NCBI gene;Acc:493777]	3	17864637	17869842	-1
Set_005	Gene_027	521615	TMPRSS11D	ENSBTAG00000001925	ENSBTAT00000002505		transmembrane serine protease 11D [Source:VGNC Symbol;Acc:VGNC:55082]	6	83534118	83573690	-1
Set_005	Gene_028	100125592	RUSC1	ENSBTAG00000054061	ENSBTAT00000067857		RUN and SH3 domain containing 1 [Source:NCBI gene;Acc:100125592]	3	15301261	15310732	-1
Set_005	Gene_029	100847392	FNDC10	ENSBTAG00000047755	ENSBTAT00000065101		fibronectin type III domain containing 10 [Source:NCBI gene;Acc:100847392]	16	51040526	51041203	1
Set_005	Gene_030	NA		ENSBTAG00000053759	ENSBTAT00000079515			18	60094269	60259210	-1
Set_005	Gene_031	NA	bta-mir-12063	ENSBTAG00000053243	ENSBTAT00000068479		bta-mir-12063 [Source:miRBase;Acc:MI0038496]	9	29836295	29836376	1
Set_005	Gene_032	522980	USP2	ENSBTAG00000009749	ENSBTAT00000012857	NM_001046263	ubiquitin specific peptidase 2 [Source:VGNC Symbol;Acc:VGNC:54894]	15	29936983	29958822	-1
Set_005	Gene_033	525823	SLC10A2	ENSBTAG00000005925	ENSBTAT00000021363		solute carrier family 10 member 2 [Source:VGNC Symbol;Acc:VGNC:53832]	12	79269215	79290951	-1
Set_005	Gene_034	538284	USP15	ENSBTAG00000010428	ENSBTAT00000078328	NM_001046430	ubiquitin specific peptidase 15 [Source:VGNC Symbol;Acc:VGNC:36713]	5	51147112	51276079	-1
Set_005	Gene_035	615795	VPREB3	ENSBTAG00000051134	ENSBTAT00000074240	NM_001281906	V-set pre-B cell surrogate light chain 3 [Source:NCBI gene;Acc:615795]	17	71220220	71222109	-1
Set_005	Gene_036	100170937	bta-mir-660	ENSBTAG00000030013	ENSBTAT00000042392		bta-mir-660 [Source:miRBase;Acc:MI0005468]	X	87740078	87740157	1
Set_005	Gene_037	615605		ENSBTAG00000053906	ENSBTAT00000080792		olfactory receptor 4A47 [Source:NCBI gene;Acc:615605]	15	78298148	78299077	1
Set_005	Gene_038	112444752		ENSBTAG00000052872	ENSBTAT00000067700		uncharacterized LOC112444752 [Source:NCBI gene;Acc:112444752]	28	42194089	42210050	-1
Set_005	Gene_039	511751	FEZ1	ENSBTAG00000009124	ENSBTAT00000012027	NM_001024522	fasciculation and elongation protein zeta 1 [Source:VGNC Symbol;Acc:VGNC:28957]	29	28906683	28949563	-1
Set_005	Gene_040	508016	ITLN2	ENSBTAG00000052308	ENSBTAT00000013594	NM_001101063	intelectin 2 [Source:NCBI gene;Acc:508016]	3	8628057	8634971	1
Set_005	Gene_041	521834	NOSTRIN	ENSBTAG00000010362	ENSBTAT00000082371	NM_001046257	nitric oxide synthase trafficking [Source:VGNC Symbol;Acc:VGNC:32176]	2	27269454	27332687	-1
Set_005	Gene_042	112445451		ENSBTAG00000054782	ENSBTAT00000078263		histone H3 [Source:NCBI gene;Acc:112445451]	NKLS02000467.1	25501	25911	-1
Set_005	Gene_043	112446503	RF00606	ENSBTAG00000043519	ENSBTAT00000060511		small nucleolar RNA, C/D box 93 [Source:HGNC Symbol;Acc:HGNC:32755]	4	31553706	31553778	1
Set_005	Gene_044	NA		ENSBTAG00000050499	ENSBTAT00000077144			13	52407159	52409863	-1
Set_005	Gene_045	526306	EXOC3L1	ENSBTAG00000012035	ENSBTAT00000015965	NM_001075882	exocyst complex component 3 like 1 [Source:VGNC Symbol;Acc:VGNC:28646]	18	34820643	34826221	-1
Set_005	Gene_046	615859	FAM170B	ENSBTAG00000047402	ENSBTAT00000064816		family with sequence similarity 170 member B [Source:VGNC Symbol;Acc:VGNC:28755]	28	43393567	43397864	-1
Set_005	Gene_047	789054	SESTD1	ENSBTAG00000001861	ENSBTAT00000038616	NM_001191250	SEC14 and spectrin domain containing 1 [Source:VGNC Symbol;Acc:VGNC:56146]	2	17618997	17764631	1
Set_005	Gene_048	507041	PRKCE	ENSBTAG00000020614	ENSBTAT00000027471		protein kinase C epsilon [Source:VGNC Symbol;Acc:VGNC:33330]	11	28303215	28635155	1
Set_005	Gene_049	NA		ENSBTAG00000035572	ENSBTAT00000050065			13	42904959	42906399	1
Set_005	Gene_050	505126	AIMP1	ENSBTAG00000004230	ENSBTAT00000076410	NM_001035018	aminoacyl tRNA synthetase complex interacting multifunctional protein 1 [Source:VGNC Symbol;Acc:VGNC:25765]	6	18836660	18865624	-1
Set_005	Gene_051	101907929		ENSBTAG00000048082	ENSBTAT00000028716		conglutinin-like [Source:NCBI gene;Acc:101907929]	28	35535068	35544437	1
Set_005	Gene_052	100297222		ENSBTAG00000050560	ENSBTAT00000081971		cytochrome b-c1 complex subunit 7 [Source:NCBI gene;Acc:100297222]	8	27564000	27564224	-1
Set_005	Gene_053	512164	ITIH2	ENSBTAG00000014075	ENSBTAT00000078190		inter-alpha-trypsin inhibitor heavy chain 2 [Source:VGNC Symbol;Acc:VGNC:50202]	13	16140331	16172586	-1
Set_005	Gene_054	534549	PODNL1	ENSBTAG00000006073	ENSBTAT00000083518		podocan like 1 [Source:VGNC Symbol;Acc:VGNC:33102]	7	11759483	11765568	1
Set_005	Gene_055	785362	SLC6A16	ENSBTAG00000030543	ENSBTAT00000017256		solute carrier family 6 member 16 [Source:VGNC Symbol;Acc:VGNC:52249]	18	55770345	55813187	-1
Set_005	Gene_056	540837	AFTPH	ENSBTAG00000009299	ENSBTAT00000061249		aftiphilin [Source:VGNC Symbol;Acc:VGNC:25718]	11	62957397	62996669	1
Set_005	Gene_057	112448595	RF00026	ENSBTAG00000044963	ENSBTAT00000062396		RNA, U6 small nuclear 412, pseudogene [Source:HGNC Symbol;Acc:HGNC:47375]	10	76446758	76446861	1
Set_005	Gene_058	NA		ENSBTAG00000051140	ENSBTAT00000082915			7	15177709	15179274	1
Set_005	Gene_059	789812		ENSBTAG00000000145	ENSBTAT00000000166		olfactory receptor 13D1 [Source:NCBI gene;Acc:789812]	8	94282767	94283720	1
Set_005	Gene_060	100337502		ENSBTAG00000021814	ENSBTAT00000029077		DEAD-box helicase 43 [Source:NCBI gene;Acc:100337502]	9	12786479	12802327	1
Set_005	Gene_061	514601	FAM102B	ENSBTAG00000005439	ENSBTAT00000007157		family with sequence similarity 102 member B [Source:VGNC Symbol;Acc:VGNC:54425]	3	34726393	34805116	-1
Set_005	Gene_062	511960	CYP27A1	ENSBTAG00000013489	ENSBTAT00000017935	NM_001083413	cytochrome P450, family 27, subfamily A, polypeptide 1 [Source:NCBI gene;Acc:511960]	2	106739389	106782307	1
Set_005	Gene_063	533230	ZNF330	ENSBTAG00000000297	ENSBTAT00000000370	NM_001038157	zinc finger protein 330 [Source:NCBI gene;Acc:533230]	17	16534317	16553468	-1
Set_005	Gene_064	534346	CEBPE	ENSBTAG00000005952	ENSBTAT00000007811	NM_001192808	CCAAT enhancer binding protein epsilon [Source:VGNC Symbol;Acc:VGNC:27162]	10	21743260	21745419	1
Set_005	Gene_065	NA		ENSBTAG00000051336	ENSBTAT00000071458			19	8645034	8645369	1
Set_005	Gene_066	613612	TMEM80	ENSBTAG00000009032	ENSBTAT00000011892	NM_001080312	transmembrane protein 80 [Source:VGNC Symbol;Acc:VGNC:36113]	29	50634390	50638626	-1
Set_005	Gene_067	112448181	RF00026	ENSBTAG00000053493	ENSBTAT00000067668			9	45762586	45762692	-1
Set_005	Gene_068	NA	RF01877	ENSBTAG00000051993	ENSBTAT00000082581			17	66308859	66309241	1
Set_005	Gene_069	NA		ENSBTAG00000054049	ENSBTAT00000077113			7	102263441	102264475	1
Set_005	Gene_070	100313278	bta-mir-2300a	ENSBTAG00000044883	ENSBTAT00000062316		bta-mir-2300a [Source:miRBase;Acc:MI0011310]	12	31797031	31797108	-1
Set_005	Gene_071	535023	FAM107B	ENSBTAG00000010023	ENSBTAT00000013221	NM_001046393	family with sequence similarity 107 member B [Source:VGNC Symbol;Acc:VGNC:57007]	13	29216135	29292558	-1
Set_005	Gene_072	100336480	ULK4	ENSBTAG00000051466	ENSBTAT00000070215		unc-51 like kinase 4 [Source:NCBI gene;Acc:100336480]	22	13851219	14373037	-1
Set_005	Gene_073	786236	SIRPB2	ENSBTAG00000006539	ENSBTAT00000008588		signal regulatory protein beta 2 [Source:NCBI gene;Acc:786236]	13	59688327	59695502	1
Set_005	Gene_074	531593	CALY	ENSBTAG00000000791	ENSBTAT00000001049	NM_001075953	calcyon neuron specific vesicular protein [Source:VGNC Symbol;Acc:VGNC:26718]	26	25666273	25678297	1
Set_005	Gene_075	NA		ENSBTAG00000048400	ENSBTAT00000078948			13	41431376	41495307	-1
Set_005	Gene_076	507339	C7	ENSBTAG00000011766	ENSBTAT00000070246	NM_001045966	complement C7 [Source:VGNC Symbol;Acc:VGNC:26643]	20	33535937	33593157	-1
Set_005	Gene_077	540462	AKTIP	ENSBTAG00000016250	ENSBTAT00000084109	NM_001206321	AKT interacting protein [Source:VGNC Symbol;Acc:VGNC:25801]	18	21847728	21860197	-1
Set_005	Gene_078	516900	ZC2HC1A	ENSBTAG00000018902	ENSBTAT00000025157		zinc finger C2HC-type containing 1A [Source:VGNC Symbol;Acc:VGNC:55757]	14	41869658	41935413	1
Set_005	Gene_079	527943	MDH1B	ENSBTAG00000016192	ENSBTAT00000082652		malate dehydrogenase 1B [Source:VGNC Symbol;Acc:VGNC:31334]	2	95031780	95064408	-1
Set_005	Gene_080	526175	PCYT1B	ENSBTAG00000016107	ENSBTAT00000072931		phosphate cytidylyltransferase 1, choline, beta [Source:VGNC Symbol;Acc:VGNC:32653]	X	118649772	118793523	1
Set_005	Gene_081	100329206	IFNAG	ENSBTAG00000046443	ENSBTAT00000054467	NM_001172040	Bos taurus IFN-alpha C (IFNAC), mRNA. [Source:RefSeq mRNA;Acc:NM_174085]	8	22907781	22908419	1
Set_005	Gene_082	NA		ENSBTAG00000053827	ENSBTAT00000081500			11	106142573	106144612	-1
Set_005	Gene_083	NA		ENSBTAG00000053621	ENSBTAT00000078320			23	30976809	30981632	1
Set_005	Gene_084	112443334	RF01169	ENSBTAG00000044345	ENSBTAT00000061778		small nucleolar RNA, C/D box 112 [Source:HGNC Symbol;Acc:HGNC:32777]	21	65795004	65795080	1
Set_005	Gene_085	NA		ENSBTAG00000052902	ENSBTAT00000078199			3	10590184	10620283	1
Set_005	Gene_086	787816		ENSBTAG00000050937	ENSBTAT00000064471		olfactory receptor 2T12 [Source:NCBI gene;Acc:787816]	8	58566	59504	-1
Set_005	Gene_087	508698	HAUS2	ENSBTAG00000005663	ENSBTAT00000045340	NM_001076819	HAUS augmin like complex subunit 2 [Source:VGNC Symbol;Acc:VGNC:29758]	10	37875148	37888393	1
Set_005	Gene_088	616574	PCTP	ENSBTAG00000018706	ENSBTAT00000068459		phosphatidylcholine transfer protein [Source:NCBI gene;Acc:317656]	19	6232166	6360656	1
Set_005	Gene_089	100336913	ABCB4	ENSBTAG00000005653	ENSBTAT00000070307		ATP binding cassette subfamily B member 4 [Source:VGNC Symbol;Acc:VGNC:53628]	4	33006669	33080056	1
Set_005	Gene_090	538958	DSEL	ENSBTAG00000037907	ENSBTAT00000056960	NM_001206461	dermatan sulfate epimerase like [Source:VGNC Symbol;Acc:VGNC:28219]	24	9444509	9454498	1
Set_005	Gene_091	NA		ENSBTAG00000050667	ENSBTAT00000078332			NKLS02000218.1	13249	13659	-1
Set_005	Gene_092	281585		ENSBTAG00000005997	ENSBTAT00000080713		multidrug resistance protein 1 [Source:NCBI gene;Acc:281585]	4	32880212	32982260	1
Set_005	Gene_093	NA		ENSBTAG00000049596	ENSBTAT00000077950			25	26893401	26896444	-1
Set_005	Gene_094	NA	RF00100	ENSBTAG00000043885	ENSBTAT00000060877			17	22384934	22385251	1
Set_005	Gene_095	NA		ENSBTAG00000049393	ENSBTAT00000085297			18	43728249	43729310	-1
Set_005	Gene_096	540254	DGCR8	ENSBTAG00000019869	ENSBTAT00000085166		DGCR8, microprocessor complex subunit [Source:VGNC Symbol;Acc:VGNC:28023]	17	72975731	72990508	1
Set_005	Gene_097	540657	GABRB2	ENSBTAG00000018585	ENSBTAT00000024736	NM_001192760	gamma-aminobutyric acid type A receptor beta2 subunit [Source:VGNC Symbol;Acc:VGNC:55210]	7	72984740	73272177	-1
Set_005	Gene_098	100300510		ENSBTAG00000027204	ENSBTAT00000053883		T-cell receptor beta-1 chain C region [Source:NCBI gene;Acc:100300510]	4	106102213	106107665	1
Set_005	Gene_099	511965	HINFP	ENSBTAG00000015015	ENSBTAT00000019990	NM_001038531	histone H4 transcription factor [Source:VGNC Symbol;Acc:VGNC:50615]	15	29699811	29709237	1
Set_005	Gene_100	788407	ANKRD65	ENSBTAG00000039055	ENSBTAT00000056210	NM_001102349	ankyrin repeat domain 65 [Source:VGNC Symbol;Acc:VGNC:25941]	16	51125124	51128060	1
Set_005	Gene_101	506631	SLC25A17	ENSBTAG00000006200	ENSBTAT00000085075		solute carrier family 25 member 17 [Source:VGNC Symbol;Acc:VGNC:34746]	5	112006046	112086674	-1
Set_005	Gene_102	NA	RF00393	ENSBTAG00000042369	ENSBTAT00000059361			3	91425683	91425813	-1
Set_005	Gene_103	NA	COLQ	ENSBTAG00000040193	ENSBTAT00000030369		collagen like tail subunit of asymmetric acetylcholinesterase [Source:VGNC Symbol;Acc:VGNC:27580]	1	152510195	152548791	-1
Set_005	Gene_104	526824	ATM	ENSBTAG00000003111	ENSBTAT00000040104	NM_001205935	ATM serine/threonine kinase [Source:VGNC Symbol;Acc:VGNC:26268]	15	17853846	17996481	1
Set_005	Gene_105	534112	CNKSR2	ENSBTAG00000044202	ENSBTAT00000061509	NM_001206513	connector enhancer of kinase suppressor of Ras 2 [Source:VGNC Symbol;Acc:VGNC:27505]	X	121644936	121953599	-1
Set_005	Gene_106	282140	ANGPT1	ENSBTAG00000014051	ENSBTAT00000018675	NM_001076797	angiopoietin 1 [Source:VGNC Symbol;Acc:VGNC:53848]	14	56984054	57285247	1
Set_005	Gene_107	NA		ENSBTAG00000051309	ENSBTAT00000071506			NKLS02000467.1	38325	38636	1
Set_005	Gene_108	538086	CAND1	ENSBTAG00000009939	ENSBTAT00000013112	NM_001101173	cullin associated and neddylation dissociated 1 [Source:VGNC Symbol;Acc:VGNC:26734]	5	46494871	46529168	-1
Set_005	Gene_109	NA		ENSBTAG00000051074	ENSBTAT00000068338			3	119932233	119935994	-1
Set_005	Gene_110	789593	ZNF784	ENSBTAG00000016299	ENSBTAT00000021685	NM_001099731	zinc finger protein 784 [Source:VGNC Symbol;Acc:VGNC:37344]	18	61921781	61924820	1
Set_005	Gene_111	504987	PYCR2	ENSBTAG00000005835	ENSBTAT00000000047	NM_001075181	pyrroline-5-carboxylate reductase 2 [Source:NCBI gene;Acc:504987]	16	28945398	28949586	-1
Set_005	Gene_112	616319		ENSBTAG00000039540	ENSBTAT00000057350	NM_001101254	solute carrier family 25 (mitochondrial carrier; phosphate carrier), member 3-like [Source:NCBI gene;Acc:616319]	3	92805776	92808149	1
Set_005	Gene_113	784346	OR51A7	ENSBTAG00000047714	ENSBTAT00000064611		olfactory receptor, family 51, subfamily A, member 7 [Source:NCBI gene;Acc:784346]	15	48915399	48916337	1
Set_005	Gene_114	104975684	HIST1H2AB	ENSBTAG00000050614	ENSBTAT00000033370		histone H2A type 1-B/E [Source:NCBI gene;Acc:104975684]	23	31891342	31891734	1
Set_005	Gene_115	NA		ENSBTAG00000053765	ENSBTAT00000067690			16	54444828	54450678	-1
Set_005	Gene_116	517977	ODF4	ENSBTAG00000014443	ENSBTAT00000019205	NM_001075762	outer dense fiber of sperm tails 4 [Source:VGNC Symbol;Acc:VGNC:55862]	19	27949539	27954573	1
Set_005	Gene_117	NA		ENSBTAG00000052084	ENSBTAT00000069901			26	31597502	31606229	1
Set_005	Gene_118	NA	E2F5	ENSBTAG00000009378	ENSBTAT00000012342		E2F transcription factor 5 [Source:VGNC Symbol;Acc:VGNC:28289]	14	77397439	77402800	-1
Set_005	Gene_119	514925	KLB	ENSBTAG00000014517	ENSBTAT00000019297	NM_001205326	klotho beta [Source:VGNC Symbol;Acc:VGNC:30622]	6	58528467	58563083	1
Set_005	Gene_120	507159	BBOX1	ENSBTAG00000014847	ENSBTAT00000068085		gamma-butyrobetaine hydroxylase 1 [Source:VGNC Symbol;Acc:VGNC:26432]	15	57758972	57839046	1
Set_005	Gene_121	505543	STAB1	ENSBTAG00000014782	ENSBTAT00000019663	NM_001205570	stabilin 1 [Source:VGNC Symbol;Acc:VGNC:35348]	22	48343002	48368328	-1
Set_005	Gene_122	510678	POLE3	ENSBTAG00000000252	ENSBTAT00000000316	NM_001034390	DNA polymerase epsilon 3, accessory subunit [Source:VGNC Symbol;Acc:VGNC:33120]	8	102655928	102658552	-1
Set_005	Gene_123	523683	CUX1	ENSBTAG00000010659	ENSBTAT00000087199		cut like homeobox 1 [Source:VGNC Symbol;Acc:VGNC:27839]	25	34703181	35062913	-1
Set_005	Gene_124	783777		ENSBTAG00000052415	ENSBTAT00000069535		olfactory receptor, family 5, subfamily K, member 3 [Source:NCBI gene;Acc:783777]	1	42439998	42440924	1
Set_005	Gene_125	100299180		ENSBTAG00000051896	ENSBTAT00000072850		multidrug resistance-associated protein 4 [Source:NCBI gene;Acc:100299180]	NKLS02000910.1	581040	719607	-1
Set_005	Gene_126	100336872	RIPOR1	ENSBTAG00000008860	ENSBTAT00000075639		RHO family interacting cell polarization regulator 1 [Source:NCBI gene;Acc:100336872]	18	35115259	35131417	1
Set_005	Gene_127	781940	SPACA7	ENSBTAG00000054563	ENSBTAT00000076864	NM_001207045	sperm acrosome associated 7 [Source:NCBI gene;Acc:781940]	12	86167315	86183236	1
Set_005	Gene_128	NA		ENSBTAG00000053404	ENSBTAT00000078339			7	94777367	94778998	1
Set_005	Gene_129	613373	FOXI2	ENSBTAG00000006218	ENSBTAT00000008160	NM_001192949	forkhead box I2 [Source:VGNC Symbol;Acc:VGNC:29088]	26	47189667	47191278	1
Set_005	Gene_130	281400	PHYH	ENSBTAG00000007700	ENSBTAT00000010126	NM_174142	phytanoyl-CoA 2-hydroxylase [Source:NCBI gene;Acc:281400]	13	27975607	27996366	-1
Set_005	Gene_131	509600	GPNMB	ENSBTAG00000000604	ENSBTAT00000000796	NM_001038065	glycoprotein nmb [Source:VGNC Symbol;Acc:VGNC:29541]	4	31876899	31903130	1
Set_005	Gene_132	508387	CCL26	ENSBTAG00000052510	ENSBTAT00000067114	NM_001205635	C-C motif chemokine ligand 26 [Source:NCBI gene;Acc:508387]	25	34038531	34043143	-1
Set_005	Gene_133	NA		ENSBTAG00000051301	ENSBTAT00000077274			3	1944383	1947012	-1
Set_005	Gene_134	101907965		ENSBTAG00000034496	ENSBTAT00000048868		26S proteasome complex subunit SEM1 [Source:NCBI gene;Acc:101907965]	22	22004736	22004948	-1
Set_005	Gene_135	NA		ENSBTAG00000054380	ENSBTAT00000086921			7	8949722	8950358	1
Set_005	Gene_136	527180	GABRQ	ENSBTAG00000013002	ENSBTAT00000060999	NM_001192639	gamma-aminobutyric acid type A receptor theta subunit [Source:VGNC Symbol;Acc:VGNC:29202]	X	35046213	35060775	1
Set_005	Gene_137	511798	FBXO9	ENSBTAG00000015083	ENSBTAT00000020074	NM_001034412	F-box protein 9 [Source:VGNC Symbol;Acc:VGNC:28921]	23	25275775	25297277	1
Set_005	Gene_138	NA	RF00003	ENSBTAG00000045078	ENSBTAT00000062511			4	16475905	16476057	-1
Set_005	Gene_139	404144	LMNA	ENSBTAG00000017574	ENSBTAT00000023373	NM_001034053	lamin A/C [Source:VGNC Symbol;Acc:VGNC:30929]	3	14642915	14670926	-1
Set_005	Gene_140	NA		ENSBTAG00000049854	ENSBTAT00000079578			16	42315235	42331786	-1
Set_005	Gene_141	786492	LGALS3	ENSBTAG00000002326	ENSBTAT00000043753	NM_001102341	galectin 3 [Source:VGNC Symbol;Acc:VGNC:30852]	10	67611143	67629446	1
Set_005	Gene_142	NA	MIR30E	ENSBTAG00000029871	ENSBTAT00000042250		microRNA 30e [Source:HGNC Symbol;Acc:HGNC:31629]	3	105460870	105460975	-1
Set_005	Gene_143	506107	BAG2	ENSBTAG00000005355	ENSBTAT00000007039	NM_001034264	BCL2 associated athanogene 2 [Source:VGNC Symbol;Acc:VGNC:26406]	23	3040820	3050862	-1
Set_005	Gene_144	516781	NAB1	ENSBTAG00000000266	ENSBTAT00000000331	NM_001102039	NGFI-A binding protein 1 [Source:VGNC Symbol;Acc:VGNC:31857]	2	5634458	5683747	-1
Set_005	Gene_145	100337213		ENSBTAG00000049961	ENSBTAT00000081920		adhesion G protein-coupled receptor E2 [Source:NCBI gene;Acc:100337213]	7	10594261	10636995	1
Set_005	Gene_146	540248	SMAD4	ENSBTAG00000006919	ENSBTAT00000009081	NM_001076209	SMAD family member 4 [Source:VGNC Symbol;Acc:VGNC:34977]	24	50524995	50577277	1
Set_005	Gene_147	539807	ZNFX1	ENSBTAG00000020166	ENSBTAT00000026859	NM_001205716	zinc finger NFX1-type containing 1 [Source:VGNC Symbol;Acc:VGNC:37357]	13	77348734	77374973	-1
Set_005	Gene_148	531444	CISD1	ENSBTAG00000003634	ENSBTAT00000004739	NM_001034057	CDGSH iron sulfur domain 1 [Source:VGNC Symbol;Acc:VGNC:27371]	26	745915	764085	-1
Set_005	Gene_149	112443289	RF00181	ENSBTAG00000051589	ENSBTAT00000060026			21	65854131	65854205	1
Set_005	Gene_150	613639	TSPAN12	ENSBTAG00000015337	ENSBTAT00000082797		tetraspanin 12 [Source:VGNC Symbol;Acc:VGNC:36427]	4	85288736	85355349	-1
Set_005	Gene_151	768031	C29H11orf86	ENSBTAG00000022246	ENSBTAT00000030041	NM_001077090	chromosome 29 C11orf86 homolog [Source:VGNC Symbol;Acc:VGNC:52700]	29	44978758	44980433	1
Set_005	Gene_152	514370	MFSD13A	ENSBTAG00000021065	ENSBTAT00000073612		major facilitator superfamily domain containing 13A [Source:VGNC Symbol;Acc:VGNC:31434]	26	23071864	23089451	1
Set_005	Gene_153	NA	RF02275	ENSBTAG00000052319	ENSBTAT00000077940			8	60358497	60358573	1
Set_005	Gene_154	NA		ENSBTAG00000048777	ENSBTAT00000078225			15	37882785	37889039	1
Set_005	Gene_155	101902553	PRR35	ENSBTAG00000033739	ENSBTAT00000056123		proline rich 35 [Source:VGNC Symbol;Acc:VGNC:33399]	25	493606	495785	1
Set_005	Gene_156	112448956	RF00026	ENSBTAG00000049956	ENSBTAT00000068497			11	104181329	104181435	1
Set_005	Gene_157	514989	SUPT16H	ENSBTAG00000020421	ENSBTAT00000027214	NM_001192392	SPT16 homolog, facilitates chromatin remodeling subunit [Source:VGNC Symbol;Acc:VGNC:35478]	10	25771978	25806673	1
Set_005	Gene_158	112443341	RF00003	ENSBTAG00000047143	ENSBTAT00000040482			21	65003590	65003751	1
Set_005	Gene_159	100298103		ENSBTAG00000050547	ENSBTAT00000053325		olfactory receptor 2Z1 [Source:NCBI gene;Acc:100298103]	7	6985281	6986183	-1
Set_005	Gene_160	281589	ABCF1	ENSBTAG00000006927	ENSBTAT00000070886	NM_001206909	ATP binding cassette subfamily F member 1 [Source:VGNC Symbol;Acc:VGNC:25480]	23	28394981	28408133	-1
Set_005	Gene_161	107131750		ENSBTAG00000050102	ENSBTAT00000071248		histone H3.1 [Source:NCBI gene;Acc:107131750]	23	31770297	31770707	1
Set_005	Gene_162	519739	GPAT3	ENSBTAG00000017592	ENSBTAT00000023396	NM_001192514	glycerol-3-phosphate acyltransferase 3 [Source:VGNC Symbol;Acc:VGNC:29513]	6	98289617	98360326	1
Set_005	Gene_163	517192	JUND	ENSBTAG00000052791	ENSBTAT00000070149	NM_001103253	JunD proto-oncogene, AP-1 transcription factor subunit [Source:NCBI gene;Acc:517192]	7	4912209	4913960	1
Set_005	Gene_164	783879	GSTM1	ENSBTAG00000037673	ENSBTAT00000021896	NM_001080354	glutathione S-transferase mu 1 [Source:NCBI gene;Acc:783879]	3	33759204	33765942	-1
Set_005	Gene_165	104968712	GFOD1	ENSBTAG00000049619	ENSBTAT00000068856		glucose-fructose oxidoreductase domain containing 1 [Source:NCBI gene;Acc:104968712]	23	43100584	43197380	1
Set_005	Gene_166	508464	GOLT1A	ENSBTAG00000010177	ENSBTAT00000066895		golgi transport 1A [Source:VGNC Symbol;Acc:VGNC:29494]	16	1964115	1978208	-1
Set_005	Gene_167	282099	TREX1	ENSBTAG00000008406	ENSBTAT00000011063	NM_174475	three prime repair exonuclease 1 [Source:VGNC Symbol;Acc:VGNC:36303]	22	51399388	51401262	-1
Set_005	Gene_168	NA		ENSBTAG00000052154	ENSBTAT00000086689			15	81494147	81495093	-1
Set_005	Gene_169	112442778	RF00026	ENSBTAG00000043422	ENSBTAT00000060414			19	12677241	12677342	-1
Set_005	Gene_170	534363	NIPSNAP3A	ENSBTAG00000006901	ENSBTAT00000009060	NM_001080298	nipsnap homolog 3A [Source:NCBI gene;Acc:534363]	8	94568397	94581931	1
Set_005	Gene_171	539126	NTRK3	ENSBTAG00000047543	ENSBTAT00000070429		neurotrophic receptor tyrosine kinase 3 [Source:NCBI gene;Acc:539126]	21	18837293	19260319	-1
Set_005	Gene_172	521959	HS3ST3A1	ENSBTAG00000031107	ENSBTAT00000044024	NM_001192548	heparan sulfate-glucosamine 3-sulfotransferase 3A1 [Source:NCBI gene;Acc:521959]	19	31738492	31823297	-1
Set_005	Gene_173	112447649	RF00026	ENSBTAG00000050358	ENSBTAT00000075119			7	8838174	8838280	-1
Set_005	Gene_174	NA		ENSBTAG00000051569	ENSBTAT00000080154			9	26459339	26464951	-1
Set_005	Gene_175	282662	VCAN	ENSBTAG00000014906	ENSBTAT00000066841	NM_181035	versican [Source:VGNC Symbol;Acc:VGNC:36778]	7	83356440	83476139	1
Set_005	Gene_176	786879		ENSBTAG00000032142	ENSBTAT00000035274		olfactory receptor, family 7, subfamily G, member 3 [Source:NCBI gene;Acc:786879]	7	13435652	13436569	1
Set_005	Gene_177	789336	KMT2C	ENSBTAG00000024199	ENSBTAT00000028347		lysine methyltransferase 2C [Source:VGNC Symbol;Acc:VGNC:30692]	4	114599696	114852530	-1
Set_005	Gene_178	282132	ADAM10	ENSBTAG00000005481	ENSBTAT00000075105	NM_174496	ADAM metallopeptidase domain 10 [Source:VGNC Symbol;Acc:VGNC:25604]	10	51535794	51679258	1
Set_005	Gene_179	NA		ENSBTAG00000053040	ENSBTAT00000067807			10	101635186	101640007	1
Set_005	Gene_180	112442653	HOXB5	ENSBTAG00000045835	ENSBTAT00000065146		homeobox B5 [Source:NCBI gene;Acc:112442653]	19	37898743	37901190	1
Set_005	Gene_181	505010	CLMN	ENSBTAG00000019916	ENSBTAT00000026533		calmin [Source:VGNC Symbol;Acc:VGNC:27452]	21	60062384	60174358	-1
Set_005	Gene_182	616482	CAPS	ENSBTAG00000006069	ENSBTAT00000007972	NM_001076424	calcyphosine [Source:VGNC Symbol;Acc:VGNC:26753]	7	18466099	18467633	-1
Set_005	Gene_183	613945	TMEM42	ENSBTAG00000016731	ENSBTAT00000071928		transmembrane protein 42 [Source:VGNC Symbol;Acc:VGNC:36087]	22	54270977	54274825	-1
Set_005	Gene_184	511073	GIP	ENSBTAG00000005045	ENSBTAT00000006656	NM_001166605	gastric inhibitory polypeptide [Source:VGNC Symbol;Acc:VGNC:29364]	19	37567760	37573005	1
Set_005	Gene_185	NA		ENSBTAG00000052109	ENSBTAT00000086485			9	24559294	24565902	-1
Set_005	Gene_186	520178	PTPN21	ENSBTAG00000018596	ENSBTAT00000024750		protein tyrosine phosphatase, non-receptor type 21 [Source:VGNC Symbol;Acc:VGNC:33535]	10	100170718	100247414	-1
Set_005	Gene_187	112447618	RF00564	ENSBTAG00000044802	ENSBTAT00000062235			7	66163440	66163578	1
Set_005	Gene_188	539643	VCPIP1	ENSBTAG00000006695	ENSBTAT00000008802		valosin containing protein interacting protein 1 [Source:VGNC Symbol;Acc:VGNC:53883]	14	30874819	30899394	-1
Set_005	Gene_189	767978	NCAPH2	ENSBTAG00000012607	ENSBTAT00000071461		non-SMC condensin II complex subunit H2 [Source:VGNC Symbol;Acc:VGNC:31906]	5	119812249	119822276	1
Set_005	Gene_190	516099	HSPB1	ENSBTAG00000011969	ENSBTAT00000044397	NM_001025569	heat shock protein family B (small) member 1 [Source:NCBI gene;Acc:516099]	25	34345339	34347009	1
Set_005	Gene_191	NA	HTATSF1	ENSBTAG00000032711	ENSBTAT00000025363		HIV-1 Tat specific factor 1 [Source:VGNC Symbol;Acc:VGNC:29990]	12	61176715	61179015	-1
Set_005	Gene_192	NA		ENSBTAG00000050121	ENSBTAT00000081658			26	18299328	18300386	1
Set_005	Gene_193	NA		ENSBTAG00000050261	ENSBTAT00000081506			8	30110859	30113168	1
Set_005	Gene_194	618828		ENSBTAG00000053868	ENSBTAT00000070083		olfactory receptor 13J1 [Source:NCBI gene;Acc:618828]	8	60118665	60119603	-1
Set_005	Gene_195	NA		ENSBTAG00000048492	ENSBTAT00000068661			22	32981125	33061928	1
Set_005	Gene_196	NA		ENSBTAG00000048487	ENSBTAT00000078405			15	73646812	73648160	-1
Set_005	Gene_197	511801	UBE2D4	ENSBTAG00000003997	ENSBTAT00000005220	NM_001075539	ubiquitin conjugating enzyme E2 D4 (putative) [Source:NCBI gene;Acc:511801]	22	341357	362047	1
Set_005	Gene_198	506776	LZTR1	ENSBTAG00000011292	ENSBTAT00000015001	NM_001192111	leucine zipper like transcription regulator 1 [Source:VGNC Symbol;Acc:VGNC:31120]	17	72327212	72339983	1
Set_005	Gene_199	507421	KRT83	ENSBTAG00000007144	ENSBTAT00000008857	NM_001083385	keratin 83 [Source:NCBI gene;Acc:507421]	5	27570607	27577406	1
Set_005	Gene_200	102465275	bta-mir-1247	ENSBTAG00000038073	ENSBTAT00000057495		bta-mir-1247 [Source:miRBase;Acc:MI0022295]	21	66493367	66493444	-1
Set_005	Gene_201	112442305		ENSBTAG00000051512	ENSBTAT00000076238		hydrocephalus-inducing protein homolog [Source:NCBI gene;Acc:112442305]	18	39855637	39986425	1
Set_005	Gene_202	526133	KCNAB1	ENSBTAG00000018465	ENSBTAT00000024576	NM_001025336	potassium voltage-gated channel subfamily A member regulatory beta subunit 1 [Source:VGNC Symbol;Acc:VGNC:30427]	1	111111924	111559606	-1
Set_005	Gene_203	533809	DDX49	ENSBTAG00000000811	ENSBTAT00000056136	NM_001081729	DEAD-box helicase 49 [Source:VGNC Symbol;Acc:VGNC:27971]	7	4284747	4292511	-1
Set_005	Gene_204	NA		ENSBTAG00000053508	ENSBTAT00000069944			21	312642	314960	1
Set_005	Gene_205	537914	TMPRSS3	ENSBTAG00000021280	ENSBTAT00000028354	NM_001192926	transmembrane serine protease 3 [Source:VGNC Symbol;Acc:VGNC:36141]	1	142660182	142680495	-1
Set_005	Gene_206	789246		ENSBTAG00000039983	ENSBTAT00000055185		olfactory receptor 1361 [Source:NCBI gene;Acc:789246]	7	6948006	6948953	-1
Set_005	Gene_207	NA		ENSBTAG00000048729	ENSBTAT00000082384			18	47062040	47062290	-1
Set_005	Gene_208	529805	CABLES2	ENSBTAG00000020797	ENSBTAT00000027714		Cdk5 and Abl enzyme substrate 2 [Source:VGNC Symbol;Acc:VGNC:54414]	13	54853814	54865432	1
Set_005	Gene_209	NA		ENSBTAG00000039406	ENSBTAT00000054475			26	5704948	5705889	-1
Set_005	Gene_210	112448973	RF00026	ENSBTAG00000043391	ENSBTAT00000060383			11	21568358	21568467	-1
Set_005	Gene_211	533089	CENPF	ENSBTAG00000024449	ENSBTAT00000033913	NM_001256586	centromere protein F [Source:VGNC Symbol;Acc:VGNC:27176]	16	68929292	68991907	-1
Set_005	Gene_212	281944	NR2E3	ENSBTAG00000014236	ENSBTAT00000018926	NM_001167900	nuclear receptor subfamily 2 group E member 3 [Source:VGNC Symbol;Acc:VGNC:32239]	10	18653771	18659405	1
Set_005	Gene_213	101903427	CPA4	ENSBTAG00000046648	ENSBTAT00000066192		carboxypeptidase A4-like [Source:NCBI gene;Acc:101903427]	4	94046269	94070532	1
Set_005	Gene_214	505830	APOM	ENSBTAG00000008833	ENSBTAT00000011633	NM_001034257	apolipoprotein M [Source:VGNC Symbol;Acc:VGNC:26034]	23	27641580	27643685	-1
Set_005	Gene_215	NA	RF01972	ENSBTAG00000051059	ENSBTAT00000078841			29	49512020	49512089	-1
Set_005	Gene_216	NA	RF00026	ENSBTAG00000048941	ENSBTAT00000068898		RNA, U6 small nuclear 866, pseudogene [Source:HGNC Symbol;Acc:HGNC:47829]	26	9578394	9578482	1
Set_005	Gene_217	617802	SCNN1G	ENSBTAG00000010163	ENSBTAT00000079061		sodium channel epithelial 1 gamma subunit [Source:VGNC Symbol;Acc:VGNC:34358]	25	20853279	20884516	1
Set_005	Gene_218	613475	MSRB2	ENSBTAG00000044112	ENSBTAT00000061486	NM_001206130	methionine sulfoxide reductase B2 [Source:VGNC Symbol;Acc:VGNC:31706]	13	24115799	24140844	1
Set_005	Gene_219	540723	RIBC2	ENSBTAG00000003594	ENSBTAT00000004671	NM_001038191	RIB43A domain with coiled-coils 2 [Source:VGNC Symbol;Acc:VGNC:33958]	5	115818297	115830013	1
Set_005	Gene_220	615016	DBF4B	ENSBTAG00000005696	ENSBTAT00000007484		DBF4 zinc finger B [Source:VGNC Symbol;Acc:VGNC:55812]	19	44448991	44478957	1
Set_005	Gene_221	NA		ENSBTAG00000048009	ENSBTAT00000063334			13	60956394	60959265	1
Set_005	Gene_222	515846	C9H6orf118	ENSBTAG00000015485	ENSBTAT00000020582	NM_001046213	chromosome 9 C6orf118 homolog [Source:VGNC Symbol;Acc:VGNC:52744]	9	100423967	100448228	-1
Set_005	Gene_223	539436	ITPRIPL1	ENSBTAG00000034995	ENSBTAT00000049472		ITPRIP like 1 [Source:VGNC Symbol;Acc:VGNC:30350]	11	2426982	2428625	1
Set_005	Gene_224	100300014		ENSBTAG00000037662	ENSBTAT00000043662		keratin-associated protein 10-12 [Source:NCBI gene;Acc:100300014]	1	144498435	144499274	-1
Set_005	Gene_225	521237	STK16	ENSBTAG00000020613	ENSBTAT00000027470	NM_001046255	serine/threonine kinase 16 [Source:VGNC Symbol;Acc:VGNC:35387]	2	107194871	107198250	1
Set_005	Gene_226	281301	MCAM	ENSBTAG00000006835	ENSBTAT00000047009		melanoma cell adhesion molecule [Source:NCBI gene;Acc:281301]	15	29886714	29894602	-1
Set_005	Gene_227	NA		ENSBTAG00000048678	ENSBTAT00000072081			18	57357636	57360244	1
Set_005	Gene_228	NA		ENSBTAG00000055185	ENSBTAT00000087195			26	26879487	27057139	-1
Set_005	Gene_229	NA		ENSBTAG00000049594	ENSBTAT00000075208			16	80452399	80455108	-1
Set_005	Gene_230	512590	RECQL5	ENSBTAG00000011715	ENSBTAT00000015555	NM_001192326	RecQ like helicase 5 [Source:VGNC Symbol;Acc:VGNC:33850]	19	55916749	55945997	1
Set_005	Gene_231	782502	ICE1	ENSBTAG00000018501	ENSBTAT00000024626		interactor of little elongation complex ELL subunit 1 [Source:VGNC Symbol;Acc:VGNC:30026]	20	67652634	67715253	-1
Set_005	Gene_232	536097		ENSBTAG00000054594	ENSBTAT00000012873		tyrosine-protein phosphatase non-receptor type substrate 1 [Source:NCBI gene;Acc:536097]	13	53505053	53517410	1
Set_005	Gene_233	515225	GHDC	ENSBTAG00000000666	ENSBTAT00000000876	NM_001075703	GH3 domain containing [Source:VGNC Symbol;Acc:VGNC:29347]	19	42307188	42312293	-1
Set_005	Gene_234	NA	RF00026	ENSBTAG00000045408	ENSBTAT00000062841			12	80423119	80423224	1
Set_005	Gene_235	NA		ENSBTAG00000051613	ENSBTAT00000084976			15	3504532	3506849	1
Set_005	Gene_236	NA	RF00004	ENSBTAG00000043747	ENSBTAT00000060739			7	62077274	62077461	1
Set_005	Gene_237	112444217	RF00494	ENSBTAG00000042870	ENSBTAT00000059862			24	36656442	36656521	-1
Set_005	Gene_238	NA	RF00100	ENSBTAG00000045427	ENSBTAT00000062860			26	31314870	31315149	1
Set_005	Gene_239	517349	USP49	ENSBTAG00000008981	ENSBTAT00000011820		ubiquitin specific peptidase 49 [Source:VGNC Symbol;Acc:VGNC:36734]	23	15607998	15669922	-1
Set_005	Gene_240	NA		ENSBTAG00000016270	ENSBTAT00000021642			11	78448092	78448878	-1
Set_005	Gene_241	NA		ENSBTAG00000049268	ENSBTAT00000073364			11	93274223	93277740	1
Set_005	Gene_242	535125	EFR3A	ENSBTAG00000047834	ENSBTAT00000010169	NM_001076047	EFR3 homolog A [Source:NCBI gene;Acc:535125]	14	9114129	9202434	-1
Set_005	Gene_243	615537	GSTM1	ENSBTAG00000017765	ENSBTAT00000086483		Bos taurus glutathione S-transferase M1 (GSTM1), mRNA. [Source:RefSeq mRNA;Acc:NM_175825]	3	33667202	33720169	-1
Set_005	Gene_244	NA		ENSBTAG00000050526	ENSBTAT00000070314			13	11371817	11374480	1
Set_005	Gene_245	NA	RF00001	ENSBTAG00000028988	ENSBTAT00000041368			16	64485072	64485200	-1
Set_005	Gene_246	NA		ENSBTAG00000001219	ENSBTAT00000082664			21	67102	78036	-1
Set_005	Gene_247	510949	ADSL	ENSBTAG00000000077	ENSBTAT00000000085	NM_001102377	adenylosuccinate lyase [Source:NCBI gene;Acc:510949]	5	111674844	111692267	1
Set_005	Gene_248	533109	TYW1	ENSBTAG00000008446	ENSBTAT00000011112	NM_001192753	tRNA-yW synthesizing protein 1 homolog (S. cerevisiae) [Source:NCBI gene;Acc:533109]	25	28378765	28522373	1
Set_005	Gene_249	530506	SMARCAD1	ENSBTAG00000017061	ENSBTAT00000047936	NM_001205432	SWI/SNF-related, matrix-associated actin-dependent regulator of chromatin, subfamily a, containing DEAD/H box 1 [Source:VGNC Symbol;Acc:VGNC:34989]	6	30308257	30398980	-1
Set_005	Gene_250	100313192	bta-mir-2284q	ENSBTAG00000044564	ENSBTAT00000061997		bta-mir-2284q [Source:miRBase;Acc:MI0011442]	27	35283194	35283258	-1
Set_006	Gene_001	100295182	ERICH4	ENSBTAG00000047423	ENSBTAT00000065598		glutamate rich 4 [Source:VGNC Symbol;Acc:VGNC:28584]	18	50578593	50581143	1
Set_006	Gene_002	100313050	bta-mir-449b	ENSBTAG00000030027	ENSBTAT00000042406		bta-mir-449b [Source:miRBase;Acc:MI0009835]	20	23943192	23943289	1
Set_006	Gene_003	518615	FIGNL2	ENSBTAG00000002673	ENSBTAT00000003463	NM_001214905	fidgetin like 2 [Source:VGNC Symbol;Acc:VGNC:56200]	5	28040793	28042763	1
Set_006	Gene_004	100125927	PDCD6	ENSBTAG00000046493	ENSBTAT00000064656	NM_001105497	programmed cell death 6 [Source:VGNC Symbol;Acc:VGNC:32663]	20	71780646	71796533	-1
Set_006	Gene_005	NA	TPD52L3	ENSBTAG00000011160	ENSBTAT00000014821		TPD52 like 3 [Source:VGNC Symbol;Acc:VGNC:54505]	8	38437521	38440175	-1
Set_006	Gene_006	100335368	HJV	ENSBTAG00000021823	ENSBTAT00000029092	NM_001206914	hemojuvelin BMP co-receptor [Source:VGNC Symbol;Acc:VGNC:52785]	3	21365083	21369973	1
Set_006	Gene_007	100139285	KNCN	ENSBTAG00000030532	ENSBTAT00000043104	NM_001191306	kinocilin [Source:VGNC Symbol;Acc:VGNC:30696]	3	99579657	99583698	1
Set_006	Gene_008	NA		ENSBTAG00000050845	ENSBTAT00000068405			7	18713831	18714274	-1
Set_006	Gene_009	527886	BEGAIN	ENSBTAG00000017716	ENSBTAT00000081368		brain enriched guanylate kinase associated [Source:VGNC Symbol;Acc:VGNC:26465]	21	65422668	65451985	-1
Set_006	Gene_010	101906182		ENSBTAG00000000237	ENSBTAT00000000291		E3 ubiquitin-protein ligase SIAH1-like [Source:NCBI gene;Acc:101906182]	5	49017944	49018762	1
Set_006	Gene_011	407129	CANX	ENSBTAG00000048107	ENSBTAT00000064711	NM_001105612	calnexin [Source:VGNC Symbol;Acc:VGNC:26736]	7	1608231	1640391	-1
Set_006	Gene_012	NA		ENSBTAG00000046499	ENSBTAT00000065291			26	25701872	25703285	1
Set_006	Gene_013	NA		ENSBTAG00000051039	ENSBTAT00000076175			5	28594348	28598234	1
Set_006	Gene_014	512690	FBXL6	ENSBTAG00000000856	ENSBTAT00000001141		F-box and leucine rich repeat protein 6 [Source:VGNC Symbol;Acc:VGNC:53864]	14	580951	583957	1
Set_006	Gene_015	514572	ANAPC4	ENSBTAG00000000646	ENSBTAT00000000852	NM_001192378	anaphase promoting complex subunit 4 [Source:VGNC Symbol;Acc:VGNC:25884]	6	44921531	44955049	1
Set_006	Gene_016	112443253	RF00105	ENSBTAG00000048713	ENSBTAT00000059389			21	2190535	2190615	1
Set_006	Gene_017	NA		ENSBTAG00000020774	ENSBTAT00000027683			19	10403579	10404250	-1
Set_006	Gene_018	507819	SPG11	ENSBTAG00000000362	ENSBTAT00000072811		SPG11, spatacsin vesicle trafficking associated [Source:VGNC Symbol;Acc:VGNC:35207]	10	102974981	103055496	-1
Set_006	Gene_019	528946	PCGF5	ENSBTAG00000004964	ENSBTAT00000006533	NM_001077980	polycomb group ring finger 5 [Source:VGNC Symbol;Acc:VGNC:32628]	26	12777507	12896019	1
Set_006	Gene_020	NA	RF02040	ENSBTAG00000053894	ENSBTAT00000086879			4	68842022	68842077	-1
Set_006	Gene_021	787932		ENSBTAG00000050140	ENSBTAT00000064529		olfactory receptor 2T8 [Source:NCBI gene;Acc:787932]	7	41529114	41530052	1
Set_006	Gene_022	541287	RNF217	ENSBTAG00000033961	ENSBTAT00000048180		ring finger protein 217 [Source:VGNC Symbol;Acc:VGNC:53802]	9	26117013	26238645	-1
Set_006	Gene_023	NA		ENSBTAG00000021147	ENSBTAT00000028185			15	46100648	46101571	-1
Set_006	Gene_024	616227	CAMK2N1	ENSBTAG00000009156	ENSBTAT00000012064	NM_001114520	calcium/calmodulin dependent protein kinase II inhibitor 1 [Source:VGNC Symbol;Acc:VGNC:26723]	2	132136807	132139923	1
Set_006	Gene_025	NA		ENSBTAG00000049135	ENSBTAT00000085768			10	4770013	4774303	1
Set_006	Gene_026	112445252	RF00494	ENSBTAG00000042915	ENSBTAT00000059907			X	79900161	79900240	-1
Set_006	Gene_027	516190	GSTT2	ENSBTAG00000008587	ENSBTAT00000044066	NM_001075738	glutathione S-transferase theta 2 [Source:NCBI gene;Acc:516190]	17	71328580	71334085	1
Set_006	Gene_028	NA	RF00598	ENSBTAG00000044842	ENSBTAT00000062275		small nucleolar RNA, H/ACA box 50B [Source:HGNC Symbol;Acc:HGNC:50432]	5	72195506	72195637	-1
Set_006	Gene_029	NA		ENSBTAG00000035021	ENSBTAT00000049500			27	4656107	4656388	1
Set_006	Gene_030	101907989		ENSBTAG00000026578	ENSBTAT00000065464		protein LEG1 homolog [Source:NCBI gene;Acc:101907989]	9	65660807	65668486	-1
Set_006	Gene_031	509823	PALMD	ENSBTAG00000017655	ENSBTAT00000081779	NM_001035079	palmdelphin [Source:VGNC Symbol;Acc:VGNC:32560]	3	43536420	43596800	-1
Set_006	Gene_032	NA		ENSBTAG00000053193	ENSBTAT00000071275			12	27324614	27362596	1
Set_006	Gene_033	519014	ARL6	ENSBTAG00000010091	ENSBTAT00000013306	NM_001075782	ADP ribosylation factor like GTPase 6 [Source:VGNC Symbol;Acc:VGNC:26149]	1	42010599	42049950	1
Set_006	Gene_034	NA		ENSBTAG00000048869	ENSBTAT00000071141			2	121333196	121336974	-1
Set_006	Gene_035	NA	bta-mir-11974	ENSBTAG00000053283	ENSBTAT00000072125		bta-mir-11974 [Source:miRBase;Acc:MI0038176]	16	50520129	50520193	-1
Set_006	Gene_036	534910	CD200	ENSBTAG00000033319	ENSBTAT00000027169	NM_001034620	CD200 molecule [Source:VGNC Symbol;Acc:VGNC:27010]	1	57126575	57147988	1
Set_006	Gene_037	NA	bta-mir-12044	ENSBTAG00000051152	ENSBTAT00000084615		bta-mir-12044 [Source:miRBase;Acc:MI0038468]	12	11256601	11256665	-1
Set_006	Gene_038	112446915	RF00026	ENSBTAG00000048739	ENSBTAT00000071594		RNA, U6 small nuclear 472, pseudogene [Source:HGNC Symbol;Acc:HGNC:47435]	5	44158508	44158611	1
Set_006	Gene_039	504746	ECT2	ENSBTAG00000023814	ENSBTAT00000032677	NM_001097573	epithelial cell transforming 2 [Source:VGNC Symbol;Acc:VGNC:28314]	1	94709117	94769544	-1
Set_006	Gene_040	514465	SMAP2	ENSBTAG00000021922	ENSBTAT00000029227	NM_001075670	small ArfGAP2 [Source:VGNC Symbol;Acc:VGNC:34984]	3	105710017	105757346	-1
Set_006	Gene_041	100138390	DEFB129	ENSBTAG00000048288	ENSBTAT00000064705		defensin beta 129 [Source:VGNC Symbol;Acc:VGNC:27989]	13	60772966	60775142	-1
Set_006	Gene_042	281798	GNRHR	ENSBTAG00000000438	ENSBTAT00000000559	NM_177514	gonadotropin releasing hormone receptor [Source:VGNC Symbol;Acc:VGNC:29482]	6	83434759	83452201	-1
Set_006	Gene_043	511417	SHOC2	ENSBTAG00000007709	ENSBTAT00000010138	NM_001101943	SHOC2, leucine rich repeat scaffold protein [Source:VGNC Symbol;Acc:VGNC:34605]	26	31481196	31568116	1
Set_006	Gene_044	NA		ENSBTAG00000051185	ENSBTAT00000076227			3	38708671	38708838	-1
Set_006	Gene_045	NA	RF01518	ENSBTAG00000051485	ENSBTAT00000074117			NKLS02002005.1	79804	79889	-1
Set_006	Gene_046	618106	CNIH2	ENSBTAG00000050992	ENSBTAT00000076684		cornichon family AMPA receptor auxiliary protein 2 [Source:NCBI gene;Acc:618106]	29	44331819	44338375	1
Set_006	Gene_047	532320	TCEAL9	ENSBTAG00000048143	ENSBTAT00000063590	NM_001205995	transcription elongation factor A like 9 [Source:VGNC Symbol;Acc:VGNC:35684]	X	51951931	51953635	-1
Set_006	Gene_048	112444892		ENSBTAG00000051470	ENSBTAT00000076625		sperm acrosomal protein FSA-ACR.1-like [Source:NCBI gene;Acc:112444892]	29	29122922	29125435	1
Set_006	Gene_049	782502	ICE1	ENSBTAG00000018501	ENSBTAT00000024626		interactor of little elongation complex ELL subunit 1 [Source:VGNC Symbol;Acc:VGNC:30026]	20	67652634	67715253	-1
Set_006	Gene_050	505031	TOMM6	ENSBTAG00000008977	ENSBTAT00000011817	NM_001113718	translocase of outer mitochondrial membrane 6 [Source:NCBI gene;Acc:505031]	23	15600547	15601893	1
Set_006	Gene_051	NA		ENSBTAG00000050689	ENSBTAT00000078815			2	119189565	119189735	1
Set_006	Gene_052	504803	ALOX12B	ENSBTAG00000012475	ENSBTAT00000016553	NM_001192038	arachidonate 12-lipoxygenase, 12R type [Source:VGNC Symbol;Acc:VGNC:25842]	19	27718183	27730008	-1
Set_006	Gene_053	614320	IAH1	ENSBTAG00000001140	ENSBTAT00000032849	NM_001034758	isoamyl acetate hydrolyzing esterase 1 (putative) [Source:VGNC Symbol;Acc:VGNC:30016]	11	87961968	87973214	-1
Set_006	Gene_054	533038	TM4SF1	ENSBTAG00000015163	ENSBTAT00000020168	NM_001075980	transmembrane 4 L six family member 1 [Source:VGNC Symbol;Acc:VGNC:35903]	1	118809503	118817968	1
Set_006	Gene_055	NA	MIRLET7A1	ENSBTAG00000029981	ENSBTAT00000042360		microRNA let-7a-1 [Source:HGNC Symbol;Acc:HGNC:31476]	8	85450390	85450483	1
Set_006	Gene_056	517947	DQX1	ENSBTAG00000016609	ENSBTAT00000033191	NM_001035322	DEAQ-box RNA dependent ATPase 1 [Source:VGNC Symbol;Acc:VGNC:28199]	11	10114072	10120751	1
Set_006	Gene_057	NA		ENSBTAG00000054286	ENSBTAT00000086570			22	11607604	11608668	-1
Set_006	Gene_058	286879	LIPE	ENSBTAG00000038321	ENSBTAT00000083208		lipase E, hormone sensitive type [Source:VGNC Symbol;Acc:VGNC:55060]	18	50889179	50907197	1
Set_006	Gene_059	508018	FREM1	ENSBTAG00000020141	ENSBTAT00000026827	NM_001192995	FRAS1 related extracellular matrix 1 [Source:VGNC Symbol;Acc:VGNC:29110]	8	29303339	29452913	1
Set_006	Gene_060	100313956	IFNT3	ENSBTAG00000050661	ENSBTAT00000079907	NM_001168275	interferon tau-3 [Source:NCBI gene;Acc:100313956]	8	22575915	22583545	-1
Set_006	Gene_061	NA		ENSBTAG00000053935	ENSBTAT00000074749			NKLS02000837.1	16637	17047	1
Set_006	Gene_062	538608	NRIP3	ENSBTAG00000013366	ENSBTAT00000082608		nuclear receptor interacting protein 3 [Source:VGNC Symbol;Acc:VGNC:32264]	15	43584066	43612623	1
Set_006	Gene_063	NA		ENSBTAG00000048738	ENSBTAT00000084273			NKLS02001214.1	59457	60581	-1
Set_006	Gene_064	517517	STPG2	ENSBTAG00000049465	ENSBTAT00000073271		sperm tail PG-rich repeat containing 2 [Source:NCBI gene;Acc:517517]	6	26377799	26741120	1
Set_006	Gene_065	532262	TLR8	ENSBTAG00000031020	ENSBTAT00000029896	NM_001033937	toll like receptor 8 [Source:NCBI gene;Acc:532262]	X	130729214	130732315	-1
Set_006	Gene_066	NA	bta-mir-2425	ENSBTAG00000045023	ENSBTAT00000062456		bta-mir-2425 [Source:miRBase;Acc:MI0011475]	5	30082250	30082330	1
Set_006	Gene_067	538044	SAXO2	ENSBTAG00000003414	ENSBTAT00000004426		stabilizer of axonemal microtubules 2 [Source:VGNC Symbol;Acc:VGNC:34302]	21	24055078	24073717	1
Set_006	Gene_068	616897	PRXL2C	ENSBTAG00000020749	ENSBTAT00000027653	NM_001076436	peroxiredoxin like 2C [Source:VGNC Symbol;Acc:VGNC:25441]	8	83378729	83396706	-1
Set_006	Gene_069	100313186	bta-mir-2390	ENSBTAG00000052780	ENSBTAT00000087283		bta-mir-2390 [Source:miRBase;Acc:MI0011430]	25	40099589	40099660	1
Set_006	Gene_070	523737	DPM2	ENSBTAG00000003388	ENSBTAT00000004393	NM_001046268	dolichyl-phosphate mannosyltransferase subunit 2, regulatory [Source:VGNC Symbol;Acc:VGNC:28184]	11	98600692	98603745	-1
Set_006	Gene_071	281490	KDM5C	ENSBTAG00000014943	ENSBTAT00000075118		lysine demethylase 5C [Source:VGNC Symbol;Acc:VGNC:49972]	X	90644022	90675643	-1
Set_006	Gene_072	104975676	H2B	ENSBTAG00000049598	ENSBTAT00000085911		histone H2B type 1 [Source:NCBI gene;Acc:505183]	23	31765645	31766025	-1
Set_006	Gene_073	107131598		ENSBTAG00000022947	ENSBTAT00000031184		60S ribosomal protein L30-like [Source:NCBI gene;Acc:107131598]	21	21540535	21540819	-1
Set_006	Gene_074	788454	MGC133764	ENSBTAG00000034064	ENSBTAT00000048313	NM_001080372	melanoma antigen family B-like [Source:NCBI gene;Acc:788454]	NKLS02001410.1	275970	277175	1
Set_006	Gene_075	613867		ENSBTAG00000048868	ENSBTAT00000087198		trace amine-associated receptor 7a [Source:NCBI gene;Acc:613867]	9	70570024	70581388	1
Set_006	Gene_076	506574	LRIG3	ENSBTAG00000002227	ENSBTAT00000002883	NM_001205591	leucine rich repeats and immunoglobulin like domains 3 [Source:VGNC Symbol;Acc:VGNC:30984]	5	54560835	54612806	1
Set_006	Gene_077	777593		ENSBTAG00000033759	ENSBTAT00000047942	NM_001078140	uncharacterized LOC777593 [Source:NCBI gene;Acc:777593]	7	59641992	59645773	-1
Set_006	Gene_078	287018	GNG5	ENSBTAG00000008122	ENSBTAT00000010682	NM_174811	G protein subunit gamma 5 [Source:NCBI gene;Acc:287018]	3	59591885	59600029	1
Set_006	Gene_079	511865		ENSBTAG00000054223	ENSBTAT00000070748		olfactory receptor 5W2 [Source:NCBI gene;Acc:511865]	15	78526536	78527465	-1
Set_006	Gene_080	504458	MLLT1	ENSBTAG00000002277	ENSBTAT00000002936		MLLT1, super elongation complex subunit [Source:VGNC Symbol;Acc:VGNC:31501]	7	18141671	18210109	1
Set_006	Gene_081	505353	PKN3	ENSBTAG00000010195	ENSBTAT00000075730	NM_001205566	protein kinase N3 [Source:VGNC Symbol;Acc:VGNC:32947]	11	99210796	99226586	1
Set_006	Gene_082	112446157	RF00026	ENSBTAG00000050751	ENSBTAT00000086545			3	98264664	98264770	1
Set_006	Gene_083	100313433	bta-mir-2284b	ENSBTAG00000044548	ENSBTAT00000061981		bta-mir-2284b [Source:miRBase;Acc:MI0011465]	4	47094216	47094286	-1
Set_006	Gene_084	504822	XPNPEP2	ENSBTAG00000010345	ENSBTAT00000013664	NM_001205555	X-prolyl aminopeptidase 2 [Source:VGNC Symbol;Acc:VGNC:36995]	X	13775714	13805036	1
Set_006	Gene_085	531996	FAM185A	ENSBTAG00000014879	ENSBTAT00000019809		family with sequence similarity 185 member A [Source:VGNC Symbol;Acc:VGNC:28767]	4	44057955	44133423	1
Set_006	Gene_086	112448607	RF00156	ENSBTAG00000043481	ENSBTAT00000060473			10	33868221	33868354	-1
Set_006	Gene_087	522191	MTERF1	ENSBTAG00000045617	ENSBTAT00000063305		mitochondrial transcription termination factor 1 [Source:VGNC Symbol;Acc:VGNC:53661]	4	9247873	9254862	-1
Set_006	Gene_088	NA		ENSBTAG00000053205	ENSBTAT00000082486			20	8025966	8027066	-1
Set_006	Gene_089	507988	CYP3A4	ENSBTAG00000052665	ENSBTAT00000007170	NM_001099367	cytochrome P450, subfamily IIIA, polypeptide 4 [Source:NCBI gene;Acc:507988]	25	36584417	36633899	-1
Set_006	Gene_090	529618	GRIA1	ENSBTAG00000005800	ENSBTAT00000082647	NM_001281913	glutamate ionotropic receptor AMPA type subunit 1 [Source:VGNC Symbol;Acc:VGNC:29638]	7	64771807	65118334	1
Set_006	Gene_091	338446	PPARGC1A	ENSBTAG00000017024	ENSBTAT00000083579	NM_177945	PPARG coactivator 1 alpha [Source:VGNC Symbol;Acc:VGNC:33184]	6	43380463	43501184	-1
Set_006	Gene_092	NA	TSPOAP1	ENSBTAG00000046321	ENSBTAT00000015433		TSPO associated protein 1 [Source:VGNC Symbol;Acc:VGNC:55881]	19	9281063	9297960	-1
Set_006	Gene_093	616607	MORN2	ENSBTAG00000024042	ENSBTAT00000033131	NM_001076428	MORN repeat containing 2 [Source:VGNC Symbol;Acc:VGNC:31559]	11	21205638	21213907	1
Set_006	Gene_094	NA		ENSBTAG00000006912	ENSBTAT00000009091			21	34401527	34440515	-1
Set_006	Gene_095	512064	DIP2B	ENSBTAG00000005246	ENSBTAT00000006902	NM_001192309	disco interacting protein 2 homolog B [Source:VGNC Symbol;Acc:VGNC:28067]	5	29182879	29412313	-1
Set_006	Gene_096	112449653	RF00026	ENSBTAG00000047079	ENSBTAT00000062964			14	41136481	41136585	-1
Set_006	Gene_097	NA		ENSBTAG00000054479	ENSBTAT00000085336			23	15817994	15820718	-1
Set_006	Gene_098	521025	ATXN1L	ENSBTAG00000046255	ENSBTAT00000063114	NM_001205881	ataxin 1 like [Source:VGNC Symbol;Acc:VGNC:26339]	18	39237968	39245893	-1
Set_006	Gene_099	528386	CAVIN4	ENSBTAG00000021992	ENSBTAT00000073253		caveolae associated protein 4 [Source:VGNC Symbol;Acc:VGNC:26805]	8	90334876	90348569	1
Set_006	Gene_100	100313240	bta-mir-2475	ENSBTAG00000053061	ENSBTAT00000085584		bta-mir-2475 [Source:miRBase;Acc:MI0011536]	8	81616371	81616441	1
Set_006	Gene_101	NA		ENSBTAG00000051992	ENSBTAT00000076362			17	72189862	72191038	-1
Set_006	Gene_102	NA		ENSBTAG00000011713	ENSBTAT00000075928			19	55946579	55960796	-1
Set_006	Gene_103	NA		ENSBTAG00000047571	ENSBTAT00000065221			18	45246762	45248910	1
Set_006	Gene_104	NA		ENSBTAG00000050934	ENSBTAT00000077259			9	60753191	60754445	1
Set_006	Gene_105	NA	RF00001	ENSBTAG00000029159	ENSBTAT00000041539			14	56516079	56516195	1
Set_006	Gene_106	100125301	PCDHGC3	ENSBTAG00000017349	ENSBTAT00000023076	NM_001102513	protocadherin gamma subfamily A, 2 [Source:NCBI gene;Acc:539654]	7	52469410	52598877	1
Set_006	Gene_107	538721	KCNA10	ENSBTAG00000008322	ENSBTAT00000010960		potassium voltage-gated channel subfamily A member 10 [Source:VGNC Symbol;Acc:VGNC:30421]	3	32922069	32923604	1
Set_006	Gene_108	524821	SFT2D1	ENSBTAG00000002993	ENSBTAT00000003895	NM_001034551	SFT2 domain containing 1 [Source:NCBI gene;Acc:524821]	9	101304152	101319276	-1
Set_006	Gene_109	785299	ANKUB1	ENSBTAG00000031346	ENSBTAT00000044418		ankyrin repeat and ubiquitin domain containing 1 [Source:VGNC Symbol;Acc:VGNC:25948]	1	118367157	118397535	1
Set_006	Gene_110	540017	FBN2	ENSBTAG00000015307	ENSBTAT00000020360	NM_001278588	fibrillin 2 [Source:VGNC Symbol;Acc:VGNC:52231]	7	25484714	25706699	1
Set_006	Gene_111	533634	OSBPL6	ENSBTAG00000014405	ENSBTAT00000083446		oxysterol binding protein like 6 [Source:VGNC Symbol;Acc:VGNC:32464]	2	18481775	18696841	-1
Set_006	Gene_112	527459	RICTOR	ENSBTAG00000006697	ENSBTAT00000008812	NM_001144096	RPTOR independent companion of MTOR complex 2 [Source:VGNC Symbol;Acc:VGNC:33963]	20	35360857	35498717	1
Set_006	Gene_113	787258	FOXE3	ENSBTAG00000051575	ENSBTAT00000068203	NM_001206322	forkhead box E3 [Source:NCBI gene;Acc:787258]	3	98850503	98852477	-1
Set_006	Gene_114	NA		ENSBTAG00000049582	ENSBTAT00000083710			18	43452250	43452888	-1
Set_006	Gene_115	NA		ENSBTAG00000053853	ENSBTAT00000079267			X	102297540	102298155	-1
Set_006	Gene_116	534423	C17H12orf49	ENSBTAG00000047139	ENSBTAT00000063283	NM_001076023	chromosome 17 C12orf49 homolog [Source:VGNC Symbol;Acc:VGNC:52645]	17	58250440	58266919	1
Set_006	Gene_117	NA		ENSBTAG00000055116	ENSBTAT00000083673			2	132108831	132109847	-1
Set_006	Gene_118	107131388		ENSBTAG00000020205	ENSBTAT00000085062		phosphodiesterase 8B [Source:NCBI gene;Acc:107131388]	10	8336670	8590336	1
Set_006	Gene_119	533179	SMIM8	ENSBTAG00000021663	ENSBTAT00000078045		small integral membrane protein 8 [Source:VGNC Symbol;Acc:VGNC:50075]	9	62573175	62585417	-1
Set_006	Gene_120	100848072		ENSBTAG00000050250	ENSBTAT00000072506		uncharacterized protein CFAP97D1 [Source:NCBI gene;Acc:100848072]	12	87009977	87013386	1
Set_006	Gene_121	NA	NRXN1	ENSBTAG00000024021	ENSBTAT00000061495		neurexin 1 [Source:HGNC Symbol;Acc:HGNC:8008]	11	32884867	33050686	-1
Set_006	Gene_122	NA		ENSBTAG00000048617	ENSBTAT00000079648			2	39549952	39550594	-1
Set_006	Gene_123	538885	CBX5	ENSBTAG00000006246	ENSBTAT00000008198	NM_001193213	chromobox 5 [Source:VGNC Symbol;Acc:VGNC:26818]	5	25786249	25812785	1
Set_006	Gene_124	NA		ENSBTAG00000050955	ENSBTAT00000083067			18	45436864	45439390	1
Set_006	Gene_125	533560	SULT2A1	ENSBTAG00000023419	ENSBTAT00000028234	NM_001046353	sulfotransferase family, cytosolic, 2A, dehydroepiandrosterone (DHEA)-preferring, member 1 [Source:NCBI gene;Acc:533560]	18	54731844	54750238	-1
Set_006	Gene_126	539144	FRAT2	ENSBTAG00000046701	ENSBTAT00000066153		FRAT2, WNT signaling pathway regulator [Source:VGNC Symbol;Acc:VGNC:55952]	26	18577904	18578593	-1
Set_006	Gene_127	512027	SIT1	ENSBTAG00000011411	ENSBTAT00000046141	NM_001206418	signaling threshold regulating transmembrane adaptor 1 [Source:VGNC Symbol;Acc:VGNC:34637]	8	59827546	59829096	-1
Set_006	Gene_128	NA	OR51B4	ENSBTAG00000051659	ENSBTAT00000085468		olfactory receptor family 51 subfamily B member 4 [Source:HGNC Symbol;Acc:HGNC:14708]	15	48307485	48308527	1
Set_006	Gene_129	781197		ENSBTAG00000017221	ENSBTAT00000022882		signal peptidase complex subunit 1 [Source:NCBI gene;Acc:781197]	19	4867726	4868034	-1
Set_006	Gene_130	539041	TLX2	ENSBTAG00000051550	ENSBTAT00000076655	NM_001192158	T cell leukemia homeobox 2 [Source:NCBI gene;Acc:539041]	11	10122252	10124335	-1
Set_006	Gene_131	281690	CHSY1	ENSBTAG00000007357	ENSBTAT00000009678	NM_001191157	chondroitin sulfate synthase 1 [Source:VGNC Symbol;Acc:VGNC:27350]	21	5285464	5375159	1
Set_006	Gene_132	617444	C25H16orf45	ENSBTAG00000011692	ENSBTAT00000071578		chromosome 25 C16orf45 homolog [Source:VGNC Symbol;Acc:VGNC:52685]	25	13881225	14026239	1
Set_006	Gene_133	107132445		ENSBTAG00000049510	ENSBTAT00000017976		olfactory receptor 9A4-like [Source:NCBI gene;Acc:107132445]	4	106366262	106367206	-1
Set_006	Gene_134	444861	KLRJ1	ENSBTAG00000022861	ENSBTAT00000031060	NM_001002884	killer cell lectin-like receptor family J member 1 [Source:NCBI gene;Acc:444861]	5	99425439	99435639	1
Set_006	Gene_135	282870	CYP1A1	ENSBTAG00000001021	ENSBTAT00000061300		cytochrome P450, subfamily I (aromatic compound-inducible), polypeptide 1 [Source:NCBI gene;Acc:282870]	21	33951654	33955241	1
Set_006	Gene_136	616317	STMN1	ENSBTAG00000013761	ENSBTAT00000079910		stathmin 1 [Source:NCBI gene;Acc:616317]	2	127152813	127183806	1
Set_006	Gene_137	518321	C1QBP	ENSBTAG00000012739	ENSBTAT00000013734	NM_001034527	complement C1q binding protein [Source:VGNC Symbol;Acc:VGNC:26618]	19	26114946	26120375	1
Set_006	Gene_138	514553	OR10Z1	ENSBTAG00000000574	ENSBTAT00000000750		olfactory receptor, family 10, subfamily Z, member 1 [Source:NCBI gene;Acc:514553]	3	11100989	11101930	-1
Set_006	Gene_139	539978	GDE1	ENSBTAG00000002101	ENSBTAT00000002710	NM_001034686	glycerophosphodiester phosphodiesterase 1 [Source:VGNC Symbol;Acc:VGNC:29298]	25	17101520	17127013	-1
Set_006	Gene_140	317711	COL4A3	ENSBTAG00000021316	ENSBTAT00000028418	NM_001166529	collagen type IV alpha 3 chain [Source:VGNC Symbol;Acc:VGNC:55339]	2	115318013	115478018	1
Set_006	Gene_141	507385	ZBTB49	ENSBTAG00000014680	ENSBTAT00000030945	NM_001205607	zinc finger and BTB domain containing 49 [Source:VGNC Symbol;Acc:VGNC:37086]	6	104792359	104819002	-1
Set_006	Gene_142	NA		ENSBTAG00000050982	ENSBTAT00000076325			22	2969148	2984926	1
Set_006	Gene_143	516012	CCDC134	ENSBTAG00000021173	ENSBTAT00000028215	NM_001205826	coiled-coil domain containing 134 [Source:VGNC Symbol;Acc:VGNC:26847]	5	112813754	112828982	1
Set_006	Gene_144	529947	SCUBE2	ENSBTAG00000020573	ENSBTAT00000027416		signal peptide, CUB domain and EGF like domain containing 2 [Source:VGNC Symbol;Acc:VGNC:34372]	15	43499994	43568212	1
Set_006	Gene_145	505186	OR4N5	ENSBTAG00000048339	ENSBTAT00000064886		olfactory receptor, family 4, subfamily N, member 5 [Source:NCBI gene;Acc:505186]	10	27488965	27489891	1
Set_006	Gene_146	535023	FAM107B	ENSBTAG00000010023	ENSBTAT00000013221	NM_001046393	family with sequence similarity 107 member B [Source:VGNC Symbol;Acc:VGNC:57007]	13	29216135	29292558	-1
Set_006	Gene_147	NA		ENSBTAG00000054521	ENSBTAT00000080720			14	25804210	25805643	-1
Set_006	Gene_148	NA		ENSBTAG00000049205	ENSBTAT00000070667			7	87067	90118	-1
Set_006	Gene_149	NA		ENSBTAG00000050929	ENSBTAT00000086312			X	122735813	122738390	-1
Set_006	Gene_150	100138645		ENSBTAG00000001041	ENSBTAT00000001383		primary amine oxidase, liver isozyme [Source:NCBI gene;Acc:100138645]	19	42921502	42933320	1
Set_006	Gene_151	112442875	RF00026	ENSBTAG00000051684	ENSBTAT00000087446			19	56659656	56659762	-1
Set_006	Gene_152	512800	DZIP1L	ENSBTAG00000015198	ENSBTAT00000079710		DAZ interacting zinc finger protein 1 like [Source:VGNC Symbol;Acc:VGNC:53540]	1	131015352	131071635	1
Set_006	Gene_153	107131142	TNFSF13B	ENSBTAG00000011563	ENSBTAT00000015363		TNF superfamily member 13b [Source:NCBI gene;Acc:504507]	12	83641466	83672595	1
Set_006	Gene_154	513577	PRPF31	ENSBTAG00000007757	ENSBTAT00000010198	NM_001206285	pre-mRNA processing factor 31 [Source:VGNC Symbol;Acc:VGNC:33374]	18	63260500	63271920	-1
Set_006	Gene_155	513347	CELF3	ENSBTAG00000019131	ENSBTAT00000033848	NM_001076845	CUGBP Elav-like family member 3 [Source:VGNC Symbol;Acc:VGNC:27168]	3	19066204	19081185	1
Set_006	Gene_156	NA		ENSBTAG00000049983	ENSBTAT00000068599			X	77056647	77123946	-1
Set_006	Gene_157	NA		ENSBTAG00000053011	ENSBTAT00000080803			14	30211580	30213886	-1
Set_006	Gene_158	614519	MORN4	ENSBTAG00000011137	ENSBTAT00000014795	NM_001035450	MORN repeat containing 4 [Source:VGNC Symbol;Acc:VGNC:31561]	26	18795089	18808252	-1
Set_006	Gene_159	NA		ENSBTAG00000053161	ENSBTAT00000081100			25	36896795	36905788	-1
Set_006	Gene_160	539084	SLC5A11	ENSBTAG00000003467	ENSBTAT00000004510	NM_001034660	solute carrier family 5 member 11 [Source:VGNC Symbol;Acc:VGNC:34904]	25	22514215	22571278	1
Set_006	Gene_161	100140999	ZNF214	ENSBTAG00000020289	ENSBTAT00000027039		zinc finger protein 214 [Source:VGNC Symbol;Acc:VGNC:49994]	15	45737686	45740602	1
Set_006	Gene_162	NA	RF00026	ENSBTAG00000044786	ENSBTAT00000062219			3	66685280	66685378	1
Set_006	Gene_163	281935	MYO10	ENSBTAG00000020126	ENSBTAT00000026812	NM_174394	myosin X [Source:VGNC Symbol;Acc:VGNC:31811]	20	56233771	56495596	1
Set_006	Gene_164	NA		ENSBTAG00000052583	ENSBTAT00000079351			1	153834039	153870059	1
Set_006	Gene_165	112449432	RF00026	ENSBTAG00000042599	ENSBTAT00000059591			13	72872107	72872212	1
Set_006	Gene_166	534118	FIG4	ENSBTAG00000005827	ENSBTAT00000007665	NM_001076014	FIG4 phosphoinositide 5-phosphatase [Source:VGNC Symbol;Acc:VGNC:29008]	9	40387289	40559531	-1
Set_006	Gene_167	NA	WDR93	ENSBTAG00000006141	ENSBTAT00000008080		WD repeat domain 93 [Source:VGNC Symbol;Acc:VGNC:53956]	21	21115571	21133179	1
Set_006	Gene_168	280826	IL6	ENSBTAG00000014921	ENSBTAT00000019865	NM_173923	interleukin 6 [Source:VGNC Symbol;Acc:VGNC:30166]	4	31454749	31459131	1
Set_006	Gene_169	506232	WDR45B	ENSBTAG00000003695	ENSBTAT00000004811	NM_001075247	WD repeat domain 45B [Source:VGNC Symbol;Acc:VGNC:36901]	19	49991652	50015614	1
Set_006	Gene_170	505599	POLR2H	ENSBTAG00000040199	ENSBTAT00000000606	NM_001192065	RNA polymerase II subunit H [Source:VGNC Symbol;Acc:VGNC:33142]	1	82824296	82829473	-1
Set_006	Gene_171	NA		ENSBTAG00000055044	ENSBTAT00000084013			24	41067634	41069508	-1
Set_006	Gene_172	532029	GNA15	ENSBTAG00000019988	ENSBTAT00000026624	NM_001192714	G protein subunit alpha 15 [Source:VGNC Symbol;Acc:VGNC:29448]	7	20665428	20685281	-1
Set_006	Gene_173	518798	PTPN14	ENSBTAG00000021553	ENSBTAT00000028717	NM_001192499	protein tyrosine phosphatase, non-receptor type 14 [Source:VGNC Symbol;Acc:VGNC:33532]	16	69034474	69223706	1
Set_006	Gene_174	512930	PQLC2	ENSBTAG00000013650	ENSBTAT00000018143	NM_001080269	PQ loop repeat containing 2 [Source:VGNC Symbol;Acc:VGNC:56138]	2	133346903	133363429	-1
Set_006	Gene_175	520120	HIST3H2BB	ENSBTAG00000053467	ENSBTAT00000036488		histone cluster 3, H2bb [Source:NCBI gene;Acc:520120]	7	2573114	2573494	-1
Set_006	Gene_176	NA		ENSBTAG00000051803	ENSBTAT00000080565			20	19510060	19510329	1
Set_006	Gene_177	100847720		ENSBTAG00000054206	ENSBTAT00000064440		interferon omega-1-like [Source:NCBI gene;Acc:100847720]	8	22674328	22674915	-1
Set_006	Gene_178	540199	WNT8A	ENSBTAG00000005570	ENSBTAT00000035270	NM_001192370	Wnt family member 8A [Source:VGNC Symbol;Acc:VGNC:36964]	7	49525958	49530902	1
Set_006	Gene_179	NA	SAMD5	ENSBTAG00000036287	ENSBTAT00000050788		sterile alpha motif domain containing 5 [Source:VGNC Symbol;Acc:VGNC:34274]	9	84831407	84831874	1
Set_006	Gene_180	513688	KIZ	ENSBTAG00000020988	ENSBTAT00000027949	NM_001163458	kizuna centrosomal protein [Source:VGNC Symbol;Acc:VGNC:30620]	13	40490248	40583448	1
Set_006	Gene_181	NA		ENSBTAG00000049449	ENSBTAT00000071227			24	39439722	39587034	-1
Set_006	Gene_182	536604	DPP8	ENSBTAG00000014807	ENSBTAT00000019706	NM_001193231	dipeptidyl peptidase 8 [Source:VGNC Symbol;Acc:VGNC:28189]	10	12373709	12424564	-1
Set_006	Gene_183	NA		ENSBTAG00000048730	ENSBTAT00000087401			17	70881251	70885629	1
Set_006	Gene_184	112442814	RF00412	ENSBTAG00000043359	ENSBTAT00000060351		small nucleolar RNA, H/ACA box 21 [Source:HGNC Symbol;Acc:HGNC:32611]	19	39442137	39442272	-1
Set_006	Gene_185	521650	ADPRHL2	ENSBTAG00000021715	ENSBTAT00000028950	NM_001035340	ADP-ribosylhydrolase like 2 [Source:VGNC Symbol;Acc:VGNC:25691]	3	109722183	109727879	-1
Set_006	Gene_186	510584	OR52W1	ENSBTAG00000008892	ENSBTAT00000011709		olfactory receptor, family 52, subfamily W, member 1 [Source:NCBI gene;Acc:510584]	15	46837272	46838657	-1
Set_006	Gene_187	104975684	HIST1H2AB	ENSBTAG00000050614	ENSBTAT00000033370		histone H2A type 1-B/E [Source:NCBI gene;Acc:104975684]	23	31891342	31891734	1
Set_006	Gene_188	535632	TGIF2	ENSBTAG00000052632	ENSBTAT00000070566	NM_001206085	TGFB induced factor homeobox 2 [Source:NCBI gene;Acc:535632]	13	65676276	65695042	1
Set_006	Gene_189	540509	RGS5	ENSBTAG00000016341	ENSBTAT00000032193	NM_001034707	regulator of G protein signaling 5 [Source:VGNC Symbol;Acc:VGNC:55670]	3	6159079	6212125	1
Set_006	Gene_190	539078	C2H2orf80	ENSBTAG00000012888	ENSBTAT00000035293	NM_001205626	chromosome 2 C2orf80 homolog [Source:VGNC Symbol;Acc:VGNC:52704]	2	96437069	96460618	-1
Set_006	Gene_191	518563	HS6ST1	ENSBTAG00000050824	ENSBTAT00000075020	NM_001192491	heparan sulfate 6-O-sulfotransferase 1 [Source:NCBI gene;Acc:518563]	2	4187288	4227153	1
Set_006	Gene_192	NA		ENSBTAG00000048907	ENSBTAT00000069607			X	85107118	85108748	1
Set_006	Gene_193	538444	SET	ENSBTAG00000020959	ENSBTAT00000027913	NM_001038564	SET nuclear proto-oncogene [Source:NCBI gene;Acc:538444]	11	99200518	99206514	1
Set_006	Gene_194	NA		ENSBTAG00000053215	ENSBTAT00000077458			3	4194378	4380142	1
Set_006	Gene_195	526697	CNTN3	ENSBTAG00000007615	ENSBTAT00000075911		contactin 3 [Source:VGNC Symbol;Acc:VGNC:27538]	22	27019069	27417544	1
Set_006	Gene_196	NA		ENSBTAG00000048547	ENSBTAT00000076601			27	34201965	34203539	-1
Set_006	Gene_197	507083	TMEM256	ENSBTAG00000031752	ENSBTAT00000023810	NM_001045957	transmembrane protein 256 [Source:NCBI gene;Acc:507083]	19	27081979	27083126	-1
Set_006	Gene_198	NA		ENSBTAG00000049112	ENSBTAT00000080561			19	41172250	41173174	1
Set_006	Gene_199	112442796	RF00156	ENSBTAG00000042105	ENSBTAT00000059097			19	18413980	18414114	1
Set_006	Gene_200	NA	RF00026	ENSBTAG00000048941	ENSBTAT00000068898		RNA, U6 small nuclear 866, pseudogene [Source:HGNC Symbol;Acc:HGNC:47829]	26	9578394	9578482	1
Set_006	Gene_201	112446153	RF00020	ENSBTAG00000042506	ENSBTAT00000059498			3	101285954	101286069	1
Set_006	Gene_202	NA	C10H15orf62	ENSBTAG00000047281	ENSBTAT00000066167		chromosome 10 C15orf62 homolog [Source:VGNC Symbol;Acc:VGNC:55106]	10	36319056	36320976	1
Set_006	Gene_203	525923	CLPS	ENSBTAG00000016833	ENSBTAT00000022391	NM_001077967	colipase [Source:VGNC Symbol;Acc:VGNC:53963]	23	9757684	9760669	-1
Set_006	Gene_204	521749		ENSBTAG00000040609	ENSBTAT00000056054		olfactory receptor 4F3/4F16/4F29 [Source:NCBI gene;Acc:521749]	10	28203512	28204477	-1
Set_006	Gene_205	112446489	RF00089	ENSBTAG00000043006	ENSBTAT00000059998			4	25846087	25846152	-1
Set_006	Gene_206	NA		ENSBTAG00000054166	ENSBTAT00000082081			17	44506135	44510673	1
Set_006	Gene_207	NA		ENSBTAG00000053020	ENSBTAT00000076487			14	43783671	43787565	-1
Set_006	Gene_208	506141	IRF4	ENSBTAG00000002929	ENSBTAT00000003812	NM_001206162	interferon regulatory factor 4 [Source:VGNC Symbol;Acc:VGNC:30275]	23	52201686	52218895	-1
Set_006	Gene_209	NA		ENSBTAG00000050875	ENSBTAT00000074668			23	51610863	51614666	-1
Set_006	Gene_210	525496	NUDT1	ENSBTAG00000002480	ENSBTAT00000003218		nudix hydrolase 1 [Source:VGNC Symbol;Acc:VGNC:32325]	25	40971643	40975697	-1
Set_006	Gene_211	NA		ENSBTAG00000054473	ENSBTAT00000086875			X	36165416	36169992	1
Set_006	Gene_212	511699	CLCN4	ENSBTAG00000011121	ENSBTAT00000014770	NM_001031757	chloride voltage-gated channel 4 [Source:VGNC Symbol;Acc:VGNC:27398]	X	132548507	132617488	-1
Set_006	Gene_213	783917		ENSBTAG00000051784	ENSBTAT00000077395		olfactory receptor 187 [Source:NCBI gene;Acc:783917]	1	42547339	42548863	1
Set_006	Gene_214	505106	USP14	ENSBTAG00000019214	ENSBTAT00000025580	NM_001075189	ubiquitin specific peptidase 14 [Source:VGNC Symbol;Acc:VGNC:36712]	24	35149151	35184341	1
Set_006	Gene_215	282044	RPH3A	ENSBTAG00000004247	ENSBTAT00000005564	NM_174454	rabphilin 3A [Source:VGNC Symbol;Acc:VGNC:34106]	17	61409306	61473245	-1
Set_006	Gene_216	530616	TCF3	ENSBTAG00000008695	ENSBTAT00000071565		transcription factor 3 [Source:VGNC Symbol;Acc:VGNC:35693]	7	43981884	44015020	-1
Set_006	Gene_217	616308		ENSBTAG00000038169	ENSBTAT00000066568		tripartite motif-containing protein 64 [Source:NCBI gene;Acc:616308]	29	5828126	5834015	1
Set_006	Gene_218	539696	HEXIM1	ENSBTAG00000006056	ENSBTAT00000007955	NM_001076181	hexamethylene bisacetamide inducible 1 [Source:VGNC Symbol;Acc:VGNC:29826]	19	44814089	44816001	1
Set_006	Gene_219	538706	COMMD10	ENSBTAG00000019071	ENSBTAT00000025390	NM_001083489	COMM domain containing 10 [Source:VGNC Symbol;Acc:VGNC:27582]	7	37598772	37783067	-1
Set_006	Gene_220	614897	SLFNL1	ENSBTAG00000001628	ENSBTAT00000030549		schlafen like 1 [Source:VGNC Symbol;Acc:VGNC:34959]	3	105195223	105198693	1
Set_006	Gene_221	504657	ARHGAP29	ENSBTAG00000004190	ENSBTAT00000071906	NM_001102485	Rho GTPase activating protein 29 [Source:VGNC Symbol;Acc:VGNC:26087]	3	49238269	49319832	1
Set_006	Gene_222	514167	ZFAND6	ENSBTAG00000012321	ENSBTAT00000016349		zinc finger AN1-type containing 6 [Source:NCBI gene;Acc:514167]	21	26043872	26098833	1
Set_006	Gene_223	533635	MCTP1	ENSBTAG00000054976	ENSBTAT00000081831		multiple C2 and transmembrane domain containing 1 [Source:NCBI gene;Acc:533635]	7	94029771	94398651	-1
Set_006	Gene_224	515773	CYB5R3	ENSBTAG00000016516	ENSBTAT00000066423		cytochrome b5 reductase 3 [Source:VGNC Symbol;Acc:VGNC:49054]	5	113473711	113498670	-1
Set_006	Gene_225	NA		ENSBTAG00000050070	ENSBTAT00000076024			16	75768942	75810353	-1
Set_006	Gene_226	NA		ENSBTAG00000051725	ENSBTAT00000075455			18	58351071	58366166	1
Set_006	Gene_227	515324	PROX1	ENSBTAG00000010978	ENSBTAT00000014573	NM_001193232	prospero homeobox 1 [Source:VGNC Symbol;Acc:VGNC:33369]	16	69536053	69590809	-1
Set_006	Gene_228	531964	SEC31A	ENSBTAG00000020525	ENSBTAT00000027346		SEC31 homolog A, COPII coat complex component [Source:VGNC Symbol;Acc:VGNC:34417]	6	97653816	97713798	-1
Set_006	Gene_229	537961	ADAMTS19	ENSBTAG00000016145	ENSBTAT00000021492	NM_001206114	ADAM metallopeptidase with thrombospondin type 1 motif 19 [Source:VGNC Symbol;Acc:VGNC:25623]	7	24410759	24678664	-1
Set_006	Gene_230	513789	WWP1	ENSBTAG00000015720	ENSBTAT00000020867	NM_001037463	WW domain containing E3 ubiquitin protein ligase 1 [Source:VGNC Symbol;Acc:VGNC:36978]	14	76218264	76322858	-1
Set_006	Gene_231	531137	LGALS3BP	ENSBTAG00000001368	ENSBTAT00000001802	NM_001046316	galectin 3 binding protein [Source:VGNC Symbol;Acc:VGNC:30853]	19	53416674	53427208	1
Set_006	Gene_232	508293	MOSPD2	ENSBTAG00000018292	ENSBTAT00000024345	NM_001101896	motile sperm domain containing 2 [Source:NCBI gene;Acc:508293]	X	128548602	128633196	-1
Set_006	Gene_233	540237	EXOC8	ENSBTAG00000006111	ENSBTAT00000008028	NM_001098112	exocyst complex component 8 [Source:VGNC Symbol;Acc:VGNC:28653]	28	4062692	4065152	-1
Set_006	Gene_234	525072	PLA2G4A	ENSBTAG00000013298	ENSBTAT00000017685	NM_001075864	phospholipase A2 group IVA [Source:VGNC Symbol;Acc:VGNC:32960]	16	67906979	68081283	1
Set_006	Gene_235	NA		ENSBTAG00000052837	ENSBTAT00000084462			5	17849488	17850498	1
Set_006	Gene_236	100170934	bta-mir-497	ENSBTAG00000029868	ENSBTAT00000042247		bta-mir-497 [Source:miRBase;Acc:MI0005467]	19	26807816	26807927	-1
Set_006	Gene_237	100336965	TENM1	ENSBTAG00000018819	ENSBTAT00000084087	NM_001256555	teneurin transmembrane protein 1 [Source:VGNC Symbol;Acc:VGNC:35741]	X	8663162	9308893	-1
Set_006	Gene_238	NA	B3GLCT	ENSBTAG00000033412	ENSBTAT00000047526		beta 3-glucosyltransferase [Source:HGNC Symbol;Acc:HGNC:20207]	12	29636372	29752743	-1
Set_006	Gene_239	617894	RHOF	ENSBTAG00000032534	ENSBTAT00000046161	NM_001040602	ras homolog family member F, filopodia associated [Source:VGNC Symbol;Acc:VGNC:33948]	17	53509789	53523519	1
Set_006	Gene_240	514494	CA5B	ENSBTAG00000020418	ENSBTAT00000027210	NM_001080908	carbonic anhydrase 5B [Source:VGNC Symbol;Acc:VGNC:26655]	X	127724914	127752302	-1
Set_006	Gene_241	NA		ENSBTAG00000049741	ENSBTAT00000068079			10	25261909	25262976	-1
Set_006	Gene_242	281530	THBS1	ENSBTAG00000002006	ENSBTAT00000002600	NM_174196	thrombospondin 1 [Source:VGNC Symbol;Acc:VGNC:35828]	10	35209595	35224867	1
Set_006	Gene_243	509649	MGC139164	ENSBTAG00000040392	ENSBTAT00000010394	NM_001101916	uncharacterized LOC509649 [Source:NCBI gene;Acc:509649]	18	60856348	60866029	-1
Set_006	Gene_244	508874	PFN4	ENSBTAG00000003404	ENSBTAT00000004412	NM_001075377	profilin family member 4 [Source:VGNC Symbol;Acc:VGNC:32778]	11	74974219	74978079	1
Set_006	Gene_245	NA	RF00026	ENSBTAG00000044335	ENSBTAT00000061768			7	60953660	60953764	-1
Set_006	Gene_246	614805	C10H15orf48	ENSBTAG00000004558	ENSBTAT00000067582		chromosome 10 C15orf48 homolog [Source:VGNC Symbol;Acc:VGNC:52612]	10	64962587	65019546	-1
Set_006	Gene_247	281545	TPSB2	ENSBTAG00000007325	ENSBTAT00000074010		tryptase beta 2 [Source:NCBI gene;Acc:281545]	25	996893	1000217	1
Set_006	Gene_248	614415	ANXA13	ENSBTAG00000048822	ENSBTAT00000085245	NM_001105435	annexin A13 [Source:NCBI gene;Acc:614415]	14	16143324	16159205	1
Set_006	Gene_249	NA	RF00026	ENSBTAG00000045030	ENSBTAT00000062463			6	21203806	21203905	-1
Set_006	Gene_250	NA	GJD4	ENSBTAG00000003640	ENSBTAT00000004748		gap junction protein delta 4 [Source:VGNC Symbol;Acc:VGNC:29386]	13	26756928	26764493	1
Set_007	Gene_001	534728	LRRC42	ENSBTAG00000019198	ENSBTAT00000043252	NM_001046386	leucine rich repeat containing 42 [Source:VGNC Symbol;Acc:VGNC:31016]	3	92241241	92262728	-1
Set_007	Gene_002	NA	bta-mir-11984	ENSBTAG00000055059	ENSBTAT00000078901		bta-mir-11984 [Source:miRBase;Acc:MI0038202]	4	118359081	118359141	1
Set_007	Gene_003	515517	LARP1B	ENSBTAG00000012135	ENSBTAT00000016102		La ribonucleoprotein domain family member 1B [Source:VGNC Symbol;Acc:VGNC:30791]	17	29525417	29663774	-1
Set_007	Gene_004	NA	RF02044	ENSBTAG00000050780	ENSBTAT00000078517			8	22096434	22096479	-1
Set_007	Gene_005	534402	PGM1	ENSBTAG00000019011	ENSBTAT00000085517		phosphoglucomutase 1 [Source:VGNC Symbol;Acc:VGNC:32793]	3	81911178	81978206	-1
Set_007	Gene_006	404123	FAHD2A	ENSBTAG00000011553	ENSBTAT00000015354	NM_205790	fumarylacetoacetate hydrolase domain containing 2A [Source:NCBI gene;Acc:404123]	11	2153786	2164529	1
Set_007	Gene_007	529410	POLR3F	ENSBTAG00000008825	ENSBTAT00000011619	NM_001038148	RNA polymerase III subunit F [Source:VGNC Symbol;Acc:VGNC:33150]	13	38533190	38546652	1
Set_007	Gene_008	505723	LARP4B	ENSBTAG00000013899	ENSBTAT00000085941		La ribonucleoprotein domain family member 4B [Source:VGNC Symbol;Acc:VGNC:30792]	13	46389229	46478656	1
Set_007	Gene_009	531964	SEC31A	ENSBTAG00000020525	ENSBTAT00000027346		SEC31 homolog A, COPII coat complex component [Source:VGNC Symbol;Acc:VGNC:34417]	6	97653816	97713798	-1
Set_007	Gene_010	524064	PTH2R	ENSBTAG00000011992	ENSBTAT00000061196	NM_001192589	parathyroid hormone 2 receptor [Source:VGNC Symbol;Acc:VGNC:33516]	2	96667717	96752328	1
Set_007	Gene_011	NA		ENSBTAG00000007443	ENSBTAT00000009786			19	5441137	5446286	-1
Set_007	Gene_012	NA		ENSBTAG00000049062	ENSBTAT00000078807			17	72994049	72994494	1
Set_007	Gene_013	NA		ENSBTAG00000051875	ENSBTAT00000080423			7	109307588	109313818	1
Set_007	Gene_014	616182	C15H11orf58	ENSBTAG00000006755	ENSBTAT00000008884	NM_001035474	chromosome 15 C11orf58 homolog [Source:VGNC Symbol;Acc:VGNC:52632]	15	35689576	35716099	-1
Set_007	Gene_015	282498	BOLA-DYB	ENSBTAG00000045923	ENSBTAT00000063954	NM_001012679	major histocompatibility complex, class II, DY beta [Source:NCBI gene;Acc:282498]	23	7096520	7105588	-1
Set_007	Gene_016	615348	PPP1R14A	ENSBTAG00000023472	ENSBTAT00000032005	NM_001193070	protein phosphatase 1 regulatory inhibitor subunit 14A [Source:VGNC Symbol;Acc:VGNC:33226]	18	48065738	48069952	-1
Set_007	Gene_017	523784	SLC6A13	ENSBTAG00000014525	ENSBTAT00000019308	NM_001099027	solute carrier family 6 member 13 [Source:VGNC Symbol;Acc:VGNC:34916]	5	107170136	107208656	-1
Set_007	Gene_018	786236	SIRPB2	ENSBTAG00000006539	ENSBTAT00000008588		signal regulatory protein beta 2 [Source:NCBI gene;Acc:786236]	13	59688327	59695502	1
Set_007	Gene_019	NA		ENSBTAG00000054273	ENSBTAT00000080904			13	43420527	43421114	1
Set_007	Gene_020	536077	FBXO41	ENSBTAG00000012759	ENSBTAT00000016959		F-box protein 41 [Source:VGNC Symbol;Acc:VGNC:28912]	11	11168103	11195919	1
Set_007	Gene_021	360196	BANF1	ENSBTAG00000031875	ENSBTAT00000045202	NM_182988	barrier to autointegration factor 1 [Source:VGNC Symbol;Acc:VGNC:54634]	29	44093697	44095654	1
Set_007	Gene_022	541308	SGCA	ENSBTAG00000003956	ENSBTAT00000043279	NM_001013402	sarcoglycan alpha [Source:VGNC Symbol;Acc:VGNC:34535]	19	36482931	36491920	-1
Set_007	Gene_023	506322	NRAS	ENSBTAG00000046797	ENSBTAT00000012897	NM_001097989	NRAS proto-oncogene, GTPase [Source:VGNC Symbol;Acc:VGNC:32253]	3	28614965	28624861	1
Set_007	Gene_024	540462	AKTIP	ENSBTAG00000016250	ENSBTAT00000084109	NM_001206321	AKT interacting protein [Source:VGNC Symbol;Acc:VGNC:25801]	18	21847728	21860197	-1
Set_007	Gene_025	NA		ENSBTAG00000053110	ENSBTAT00000086131			27	6183690	6188322	1
Set_007	Gene_026	NA	MRGPRG	ENSBTAG00000031271	ENSBTAT00000044295		MAS related GPR family member G [Source:HGNC Symbol;Acc:HGNC:24829]	29	48410028	48413199	1
Set_007	Gene_027	NA		ENSBTAG00000048455	ENSBTAT00000086678			26	39956273	39957700	1
Set_007	Gene_028	112443039	RF00577	ENSBTAG00000042297	ENSBTAT00000059289		small nucleolar RNA, C/D box 72 [Source:HGNC Symbol;Acc:HGNC:32733]	20	33656058	33656139	1
Set_007	Gene_029	112442809	RF00288	ENSBTAG00000042305	ENSBTAT00000059297		small nucleolar RNA, C/D box 7 [Source:HGNC Symbol;Acc:HGNC:32704]	19	14769240	14769336	-1
Set_007	Gene_030	514864		ENSBTAG00000051976	ENSBTAT00000055184		putative olfactory receptor 8G2 [Source:NCBI gene;Acc:514864]	29	27478275	27483101	1
Set_007	Gene_031	540439	EPHA10	ENSBTAG00000020510	ENSBTAT00000033263	NM_001205822	EPH receptor A10 [Source:VGNC Symbol;Acc:VGNC:28533]	3	108149712	108190353	1
Set_007	Gene_032	504291	MITD1	ENSBTAG00000003970	ENSBTAT00000005179	NM_001110063	microtubule interacting and trafficking domain containing 1 [Source:VGNC Symbol;Acc:VGNC:54455]	11	4320918	4336873	-1
Set_007	Gene_033	282605	FAM13A	ENSBTAG00000011187	ENSBTAT00000071336		family with sequence similarity 13 member A [Source:VGNC Symbol;Acc:VGNC:28731]	6	35721146	36031040	1
Set_007	Gene_034	NA		ENSBTAG00000020790	ENSBTAT00000027705			26	11778619	11779418	1
Set_007	Gene_035	NA		ENSBTAG00000054664	ENSBTAT00000071922			7	37573462	37592163	1
Set_007	Gene_036	NA		ENSBTAG00000050678	ENSBTAT00000081343			5	84614210	84619032	-1
Set_007	Gene_037	NA		ENSBTAG00000055024	ENSBTAT00000075342			X	68341714	68343365	1
Set_007	Gene_038	521004	SLC39A10	ENSBTAG00000016782	ENSBTAT00000022316		solute carrier family 39 member 10 [Source:VGNC Symbol;Acc:VGNC:34858]	2	84253392	84389538	1
Set_007	Gene_039	615507	GSTM3	ENSBTAG00000001842	ENSBTAT00000085178		glutathione S-transferase mu 3 [Source:VGNC Symbol;Acc:VGNC:29686]	3	33652466	33655778	1
Set_007	Gene_040	782966		ENSBTAG00000034182	ENSBTAT00000015004		tubulin alpha-1 chain [Source:NCBI gene;Acc:782966]	1	40948983	40950338	1
Set_007	Gene_041	781109	MYRFL	ENSBTAG00000014829	ENSBTAT00000019581	NM_001102323	myelin regulatory factor like [Source:VGNC Symbol;Acc:VGNC:31845]	5	43516703	43642194	-1
Set_007	Gene_042	617917	AKR1C3	ENSBTAG00000022571	ENSBTAT00000028488	NM_001038584	aldo-keto reductase family 1, member C3 (3-alpha hydroxysteroid dehydrogenase, type II) [Source:NCBI gene;Acc:617917]	13	43578475	43587393	1
Set_007	Gene_043	100296545	EFCAB10	ENSBTAG00000053355	ENSBTAT00000067337		EF-hand calcium binding domain 10 [Source:NCBI gene;Acc:100296545]	4	46670649	46685149	-1
Set_007	Gene_044	521224		ENSBTAG00000005448	ENSBTAT00000007169		ras GTPase-activating protein 4 [Source:NCBI gene;Acc:521224]	25	34549739	34572255	1
Set_007	Gene_045	518794	MAP6	ENSBTAG00000001028	ENSBTAT00000001366		microtubule associated protein 6 [Source:VGNC Symbol;Acc:VGNC:54448]	15	54763503	54846909	-1
Set_007	Gene_046	NA		ENSBTAG00000053636	ENSBTAT00000077018			23	9440064	9440282	1
Set_007	Gene_047	768069	C8H8orf74	ENSBTAG00000004134	ENSBTAT00000005411	NM_001077126	chromosome 8 C8orf74 homolog [Source:VGNC Symbol;Acc:VGNC:52737]	8	8587781	8618663	-1
Set_007	Gene_048	NA		ENSBTAG00000051320	ENSBTAT00000067694			12	63315175	63317364	-1
Set_007	Gene_049	518246	GIPC2	ENSBTAG00000011733	ENSBTAT00000015583	NM_001080279	GIPC PDZ domain containing family member 2 [Source:VGNC Symbol;Acc:VGNC:29366]	3	66535129	66637864	-1
Set_007	Gene_050	NA		ENSBTAG00000049276	ENSBTAT00000075902			14	2061681	2063295	-1
Set_007	Gene_051	NA	TPD52L3	ENSBTAG00000011160	ENSBTAT00000014821		TPD52 like 3 [Source:VGNC Symbol;Acc:VGNC:54505]	8	38437521	38440175	-1
Set_007	Gene_052	282608	CACNA2D1	ENSBTAG00000020569	ENSBTAT00000027409		calcium voltage-gated channel auxiliary subunit alpha2delta 1 [Source:VGNC Symbol;Acc:VGNC:26679]	4	38152730	38673177	1
Set_007	Gene_053	618634	TRIM17	ENSBTAG00000018673	ENSBTAT00000024853	NM_001105011	tripartite motif containing 17 [Source:VGNC Symbol;Acc:VGNC:36317]	7	2624069	2631337	1
Set_007	Gene_054	527169	GRSF1	ENSBTAG00000008577	ENSBTAT00000011313	NM_001077971	G-rich RNA sequence binding factor 1 [Source:VGNC Symbol;Acc:VGNC:29667]	6	86196005	86214840	-1
Set_007	Gene_055	513742	DAAM1	ENSBTAG00000005984	ENSBTAT00000075877		dishevelled associated activator of morphogenesis 1 [Source:VGNC Symbol;Acc:VGNC:27862]	10	71479280	71670966	1
Set_007	Gene_056	NA		ENSBTAG00000038702	ENSBTAT00000074016			18	60418125	60425791	-1
Set_007	Gene_057	NA		ENSBTAG00000055016	ENSBTAT00000083149			17	71069365	71070085	1
Set_007	Gene_058	112442122	RF00026	ENSBTAG00000052344	ENSBTAT00000060430			17	5239414	5239520	-1
Set_007	Gene_059	520166	GABRR3	ENSBTAG00000001416	ENSBTAT00000001857	NM_001192519	gamma-aminobutyric acid type A receptor rho3 subunit [Source:VGNC Symbol;Acc:VGNC:53569]	1	42241399	42286990	-1
Set_007	Gene_060	100313033	bta-mir-330	ENSBTAG00000029933	ENSBTAT00000042312		bta-mir-330 [Source:miRBase;Acc:MI0009803]	18	53226503	53226596	-1
Set_007	Gene_061	510417	BOLA-NC1	ENSBTAG00000019386	ENSBTAT00000025832		non-classical MHC class I antigen [Source:NCBI gene;Acc:510417]	23	28548781	28553089	-1
Set_007	Gene_062	783989	PIGO	ENSBTAG00000044135	ENSBTAT00000061353		phosphatidylinositol glycan anchor biosynthesis class O [Source:VGNC Symbol;Acc:VGNC:32874]	8	59345169	59351847	-1
Set_007	Gene_063	515376	CDC20	ENSBTAG00000009819	ENSBTAT00000012945	NM_001082436	cell division cycle 20 [Source:VGNC Symbol;Acc:VGNC:27060]	3	102655232	102659704	-1
Set_007	Gene_064	540816	ZNF189	ENSBTAG00000015348	ENSBTAT00000020403		zinc finger protein 189 [Source:VGNC Symbol;Acc:VGNC:37220]	8	91125259	91131042	1
Set_007	Gene_065	NA		ENSBTAG00000047024	ENSBTAT00000064270			9	40863110	40889767	-1
Set_007	Gene_066	280745	CD5	ENSBTAG00000013730	ENSBTAT00000018258	NM_173899	CD5 molecule [Source:VGNC Symbol;Acc:VGNC:27037]	29	37422743	37445044	1
Set_007	Gene_067	NA		ENSBTAG00000049935	ENSBTAT00000072248			14	81242019	81243509	1
Set_007	Gene_068	534774	BACE2	ENSBTAG00000000394	ENSBTAT00000000507	NM_001206062	beta-secretase 2 [Source:VGNC Symbol;Acc:VGNC:26401]	1	141381147	141486921	1
Set_007	Gene_069	529656	GRM6	ENSBTAG00000016187	ENSBTAT00000021547		glutamate metabotropic receptor 6 [Source:VGNC Symbol;Acc:VGNC:29661]	7	2408473	2419990	1
Set_007	Gene_070	531691	HECW2	ENSBTAG00000020696	ENSBTAT00000038307		HECT, C2 and WW domain containing E3 ubiquitin protein ligase 2 [Source:VGNC Symbol;Acc:VGNC:56116]	2	84741175	85088822	-1
Set_007	Gene_071	NA	RF02271	ENSBTAG00000048548	ENSBTAT00000086955			NKLS02002210.1	264019	264188	1
Set_007	Gene_072	532528	GNL1	ENSBTAG00000025516	ENSBTAT00000035886	NM_001103272	G protein nucleolar 1 (putative) [Source:VGNC Symbol;Acc:VGNC:57319]	23	28420981	28428768	1
Set_007	Gene_073	537542	RBM34	ENSBTAG00000000221	ENSBTAT00000057151		RNA binding motif protein 34 [Source:NCBI gene;Acc:537542]	28	7903182	7923038	-1
Set_007	Gene_074	536956	YARS2	ENSBTAG00000011399	ENSBTAT00000015149	NM_001098088	tyrosyl-tRNA synthetase 2 [Source:VGNC Symbol;Acc:VGNC:37016]	5	77131742	77158404	1
Set_007	Gene_075	100847979	CFAP99	ENSBTAG00000054376	ENSBTAT00000072866		cilia and flagella associated protein 99 [Source:NCBI gene;Acc:100847979]	6	116227490	116265523	-1
Set_007	Gene_076	617707	PLPP3	ENSBTAG00000011640	ENSBTAT00000015460	NM_001076473	phospholipid phosphatase 3 [Source:VGNC Symbol;Acc:VGNC:33046]	3	89608083	89696904	1
Set_007	Gene_077	515773	CYB5R3	ENSBTAG00000016516	ENSBTAT00000066423		cytochrome b5 reductase 3 [Source:VGNC Symbol;Acc:VGNC:49054]	5	113473711	113498670	-1
Set_007	Gene_078	524854	THUMPD1	ENSBTAG00000047673	ENSBTAT00000064153	NM_001046277	THUMP domain containing 1 [Source:VGNC Symbol;Acc:VGNC:35853]	25	18452580	18456836	-1
Set_007	Gene_079	NA		ENSBTAG00000021375	ENSBTAT00000028496			15	81279136	81398068	-1
Set_007	Gene_080	327693	HINT1	ENSBTAG00000010959	ENSBTAT00000014552	NM_175812	histidine triad nucleotide binding protein 1 [Source:VGNC Symbol;Acc:VGNC:29854]	7	23271324	23278556	1
Set_007	Gene_081	784614		ENSBTAG00000050455	ENSBTAT00000074843		olfactory receptor 2H2-like [Source:NCBI gene;Acc:784614]	23	29568995	29569939	-1
Set_007	Gene_082	617042	NTMT1	ENSBTAG00000015437	ENSBTAT00000020514	NM_001038217	N-terminal Xaa-Pro-Lys N-methyltransferase 1 [Source:VGNC Symbol;Acc:VGNC:32303]	11	100021354	100029200	1
Set_007	Gene_083	100126049	NUDT14	ENSBTAG00000048010	ENSBTAT00000063951	NM_001105652	nudix hydrolase 14 [Source:VGNC Symbol;Acc:VGNC:32328]	21	69532009	69539133	-1
Set_007	Gene_084	534137	SASH3	ENSBTAG00000002041	ENSBTAT00000002645	NM_001077998	SAM and SH3 domain containing 3 [Source:VGNC Symbol;Acc:VGNC:34294]	X	13811114	13826009	1
Set_007	Gene_085	100313122	bta-mir-2297	ENSBTAG00000045474	ENSBTAT00000062907		bta-mir-2297 [Source:miRBase;Acc:MI0011307]	11	37367356	37367428	-1
Set_007	Gene_086	NA	FAM217A	ENSBTAG00000002089	ENSBTAT00000002699		family with sequence similarity 217 member A [Source:VGNC Symbol;Acc:VGNC:53967]	23	50064704	50081070	1
Set_007	Gene_087	112448304	RF00092	ENSBTAG00000042475	ENSBTAT00000059467		small nucleolar RNA, H/ACA box 63 [Source:HGNC Symbol;Acc:HGNC:10106]	1	80470085	80470216	-1
Set_007	Gene_088	NA		ENSBTAG00000049926	ENSBTAT00000086195			24	16344227	16345068	1
Set_007	Gene_089	511010	PTPN3	ENSBTAG00000018841	ENSBTAT00000079084		protein tyrosine phosphatase, non-receptor type 3 [Source:VGNC Symbol;Acc:VGNC:33538]	8	98927206	99092707	-1
Set_007	Gene_090	515011	ITGA2B	ENSBTAG00000008165	ENSBTAT00000010741	NM_001014929	integrin subunit alpha 2b [Source:VGNC Symbol;Acc:VGNC:30314]	19	44172212	44185276	-1
Set_007	Gene_091	NA		ENSBTAG00000052185	ENSBTAT00000079903			12	75010245	75022843	1
Set_007	Gene_092	614212	LMO4	ENSBTAG00000000305	ENSBTAT00000000389	NM_001034751	LIM domain only 4 [Source:VGNC Symbol;Acc:VGNC:30936]	3	56698600	56715731	-1
Set_007	Gene_093	504876	RPL23	ENSBTAG00000003229	ENSBTAT00000004190	NM_001035014	ribosomal protein L23 [Source:VGNC Symbol;Acc:VGNC:55867]	19	39438637	39443096	-1
Set_007	Gene_094	532280	CNTLN	ENSBTAG00000001847	ENSBTAT00000081095	NM_001192721	centlein [Source:VGNC Symbol;Acc:VGNC:56940]	8	26894319	27246452	-1
Set_007	Gene_095	112442775	RF00026	ENSBTAG00000043534	ENSBTAT00000060526			19	44995862	44995965	1
Set_007	Gene_096	614837	SSU72	ENSBTAG00000002575	ENSBTAT00000003331	NM_001076349	SSU72 homolog, RNA polymerase II CTD phosphatase [Source:NCBI gene;Acc:614837]	16	51053560	51078042	1
Set_007	Gene_097	102465294	bta-mir-2284aa-3	ENSBTAG00000053249	ENSBTAT00000061830		bta-mir-2284aa-3 [Source:miRBase;Acc:MI0022327]	19	28410465	28410544	-1
Set_007	Gene_098	506187	ACAP2	ENSBTAG00000003378	ENSBTAT00000082111		ArfGAP with coiled-coil, ankyrin repeat and PH domains 2 [Source:VGNC Symbol;Acc:VGNC:25527]	1	72150081	72264225	1
Set_007	Gene_099	789713	RALGPS2	ENSBTAG00000010718	ENSBTAT00000034000		Ral GEF with PH domain and SH3 binding motif 2 [Source:VGNC Symbol;Acc:VGNC:33705]	16	60124735	60284409	1
Set_007	Gene_100	NA		ENSBTAG00000052963	ENSBTAT00000066441			9	78221704	78222000	1
Set_007	Gene_101	517831	KLHL18	ENSBTAG00000006573	ENSBTAT00000008633	NM_001102043	kelch like family member 18 [Source:VGNC Symbol;Acc:VGNC:30647]	22	52310680	52361884	-1
Set_007	Gene_102	512723	DLAT	ENSBTAG00000010709	ENSBTAT00000014176	NM_001205730	dihydrolipoamide S-acetyltransferase [Source:NCBI gene;Acc:512723]	15	22340056	22374925	1
Set_007	Gene_103	517531	MIPEP	ENSBTAG00000008888	ENSBTAT00000011704		mitochondrial intermediate peptidase [Source:VGNC Symbol;Acc:VGNC:31483]	12	34305327	34390737	1
Set_007	Gene_104	786717		ENSBTAG00000049260	ENSBTAT00000072027		T cell receptor alpha variable 18 [Source:NCBI gene;Acc:786717]	10	23046791	23049092	1
Set_007	Gene_105	100135054	GTF3A	ENSBTAG00000012600	ENSBTAT00000016732	NM_001113572	general transcription factor IIIA [Source:VGNC Symbol;Acc:VGNC:29701]	12	32485688	32495663	-1
Set_007	Gene_106	101904581	CCDC154	ENSBTAG00000000568	ENSBTAT00000081217		coiled-coil domain containing 154 [Source:VGNC Symbol;Acc:VGNC:26859]	25	1129364	1137303	-1
Set_007	Gene_107	505558	KDSR	ENSBTAG00000007723	ENSBTAT00000010155	NM_001045919	3-ketodihydrosphingosine reductase [Source:VGNC Symbol;Acc:VGNC:30536]	24	61599658	61638727	-1
Set_007	Gene_108	444866	ZNF470	ENSBTAG00000046101	ENSBTAT00000064558	NM_001206754	zinc finger protein 470 [Source:NCBI gene;Acc:444866]	18	63864852	63872963	-1
Set_007	Gene_109	781903	C5H12orf60	ENSBTAG00000008351	ENSBTAT00000010999		chromosome 5 C12orf60 homolog [Source:VGNC Symbol;Acc:VGNC:49256]	5	95085927	95086643	-1
Set_007	Gene_110	281885	KITLG	ENSBTAG00000017549	ENSBTAT00000074582	NM_174375	KIT ligand [Source:VGNC Symbol;Acc:VGNC:30619]	5	18250809	18353485	-1
Set_007	Gene_111	531369	TTF2	ENSBTAG00000015392	ENSBTAT00000033711	NM_001080735	transcription termination factor 2 [Source:VGNC Symbol;Acc:VGNC:36484]	3	26126025	26179583	-1
Set_007	Gene_112	112449640	RF00026	ENSBTAG00000050330	ENSBTAT00000074604			14	34124661	34124767	1
Set_007	Gene_113	515581	TADA2B	ENSBTAG00000010185	ENSBTAT00000013438	NM_001206410	transcriptional adaptor 2B [Source:NCBI gene;Acc:515581]	6	113511976	113524514	1
Set_007	Gene_114	281637	ARRB1	ENSBTAG00000020485	ENSBTAT00000045006	NM_174243	arrestin beta 1 [Source:VGNC Symbol;Acc:VGNC:26169]	15	54480057	54553148	-1
Set_007	Gene_115	515331	PTGDR	ENSBTAG00000006703	ENSBTAT00000008808	NM_001098034	prostaglandin D2 receptor [Source:VGNC Symbol;Acc:VGNC:33499]	10	45157991	45165480	1
Set_007	Gene_116	NA		ENSBTAG00000039809	ENSBTAT00000053935			7	13762762	13769861	-1
Set_007	Gene_117	539825	MAST1	ENSBTAG00000006080	ENSBTAT00000007991	NM_001191528	microtubule associated serine/threonine kinase 1 [Source:VGNC Symbol;Acc:VGNC:31257]	7	12679399	12704101	-1
Set_007	Gene_118	519202		ENSBTAG00000047110	ENSBTAT00000080623		solute carrier family 22 member 6 [Source:NCBI gene;Acc:519202]	29	41246408	41274364	-1
Set_007	Gene_119	NA		ENSBTAG00000051661	ENSBTAT00000068883			NKLS02001219.1	32	3260	1
Set_007	Gene_120	281204	GNG3	ENSBTAG00000002508	ENSBTAT00000003257	NM_174073	G protein subunit gamma 3 [Source:VGNC Symbol;Acc:VGNC:29466]	29	41024955	41027570	1
Set_007	Gene_121	NA		ENSBTAG00000048736	ENSBTAT00000072367			1	157827936	157916510	-1
Set_007	Gene_122	NA		ENSBTAG00000053209	ENSBTAT00000074207			3	32471098	32472098	-1
Set_007	Gene_123	100140560	FBXO46	ENSBTAG00000048966	ENSBTAT00000080440		F-box protein 46 [Source:NCBI gene;Acc:100140560]	18	53267531	53269348	-1
Set_007	Gene_124	112448171	RF00619	ENSBTAG00000043067	ENSBTAT00000060059			9	21574723	21574848	-1
Set_007	Gene_125	100337041	SGPP2	ENSBTAG00000046649	ENSBTAT00000067390		sphingosine-1-phosphate phosphatase 2 [Source:VGNC Symbol;Acc:VGNC:54481]	2	110589561	110734612	1
Set_007	Gene_126	788898		ENSBTAG00000051181	ENSBTAT00000066143		olfactory receptor 52R1-like [Source:NCBI gene;Acc:788898]	15	50187730	50190362	1
Set_007	Gene_127	NA		ENSBTAG00000050324	ENSBTAT00000083972			5	99404312	99408340	-1
Set_007	Gene_128	517724	GSTT1	ENSBTAG00000040298	ENSBTAT00000007403	NM_001046232	glutathione S-transferase theta 1 [Source:NCBI gene;Acc:517724]	17	71318878	71326525	1
Set_007	Gene_129	NA	bta-mir-12042	ENSBTAG00000050864	ENSBTAT00000075050		bta-mir-12042 [Source:miRBase;Acc:MI0038465]	25	10372691	10372750	-1
Set_007	Gene_130	505523	WFDC3	ENSBTAG00000016742	ENSBTAT00000086928		WAP four-disulfide core domain 3 [Source:VGNC Symbol;Acc:VGNC:57034]	13	74551350	74564779	-1
Set_007	Gene_131	786629	E2F8	ENSBTAG00000017446	ENSBTAT00000086675		E2F transcription factor 8 [Source:VGNC Symbol;Acc:VGNC:28292]	29	25699093	25717254	1
Set_007	Gene_132	515716	NKAPL	ENSBTAG00000031871	ENSBTAT00000045191	NM_001102498	NFKB activating protein like [Source:VGNC Symbol;Acc:VGNC:54230]	23	30431383	30435000	-1
Set_007	Gene_133	540519	OPRK1	ENSBTAG00000000914	ENSBTAT00000001209	NM_001318764	opioid receptor kappa 1 [Source:VGNC Symbol;Acc:VGNC:32439]	14	21713331	21737924	-1
Set_007	Gene_134	515887		ENSBTAG00000038290	ENSBTAT00000054151		olfactory receptor 8S1 [Source:NCBI gene;Acc:515887]	5	31313747	31314682	-1
Set_007	Gene_135	615431	MRPS6	ENSBTAG00000012594	ENSBTAT00000016717	NM_001040584	mitochondrial ribosomal protein S6 [Source:VGNC Symbol;Acc:VGNC:31676]	1	1390803	1455219	-1
Set_007	Gene_136	NA		ENSBTAG00000053661	ENSBTAT00000085311			13	74222899	74227610	-1
Set_007	Gene_137	512798	EPHA2	ENSBTAG00000000815	ENSBTAT00000073445		EPH receptor A2 [Source:VGNC Symbol;Acc:VGNC:28534]	2	135934234	135972074	1
Set_007	Gene_138	538528	FBXO8	ENSBTAG00000006715	ENSBTAT00000008831	NM_001015667	F-box protein 8 [Source:VGNC Symbol;Acc:VGNC:28920]	8	6554603	6595352	-1
Set_007	Gene_139	100335582	C7H5orf63	ENSBTAG00000017835	ENSBTAT00000023708		chromosome 7 C5orf63 homolog [Source:VGNC Symbol;Acc:VGNC:52736]	7	26915949	26922450	1
Set_007	Gene_140	538541	TSPYL1	ENSBTAG00000010885	ENSBTAT00000014457	NM_001076111	TSPY like 1 [Source:VGNC Symbol;Acc:VGNC:53811]	9	34430224	34433482	1
Set_007	Gene_141	538360	GRM8	ENSBTAG00000054974	ENSBTAT00000072365	NM_001206117	glutamate metabotropic receptor 8 [Source:NCBI gene;Acc:538360]	4	90671659	91510132	-1
Set_007	Gene_142	514210	MAP3K11	ENSBTAG00000004114	ENSBTAT00000005378	NM_001101991	mitogen-activated protein kinase kinase kinase 11 [Source:VGNC Symbol;Acc:VGNC:31189]	29	43778592	43795152	-1
Set_007	Gene_143	613818	TBPL1	ENSBTAG00000035370	ENSBTAT00000049877	NM_001076290	TATA-box binding protein like 1 [Source:VGNC Symbol;Acc:VGNC:35660]	9	72112133	72151639	1
Set_007	Gene_144	513496	CCDC9B	ENSBTAG00000013774	ENSBTAT00000067417		coiled-coil domain containing 9B [Source:VGNC Symbol;Acc:VGNC:55108]	10	35947853	35956754	-1
Set_007	Gene_145	533232	SMARCD1	ENSBTAG00000037935	ENSBTAT00000001284	NM_001038559	SWI/SNF related, matrix associated, actin dependent regulator of chromatin, subfamily d, member 1 [Source:VGNC Symbol;Acc:VGNC:34993]	5	29799573	29810207	-1
Set_007	Gene_146	526104	SIX4	ENSBTAG00000049091	ENSBTAT00000067806		SIX homeobox 4 [Source:NCBI gene;Acc:526104]	10	72874594	72885767	-1
Set_007	Gene_147	506984	KIAA1147	ENSBTAG00000016879	ENSBTAT00000022453		KIAA1147 [Source:VGNC Symbol;Acc:VGNC:30564]	4	104914558	104960261	-1
Set_007	Gene_148	510910	CD84	ENSBTAG00000019033	ENSBTAT00000025333		CD84 molecule [Source:VGNC Symbol;Acc:VGNC:53854]	3	9076733	9119524	1
Set_007	Gene_149	NA		ENSBTAG00000048007	ENSBTAT00000063176			8	8412698	8413435	-1
Set_007	Gene_150	282410	CACNA1B	ENSBTAG00000007882	ENSBTAT00000048983	NM_174632	calcium voltage-gated channel subunit alpha1 B [Source:VGNC Symbol;Acc:VGNC:26673]	11	106722392	106933600	1
Set_007	Gene_151	100296935	DEFB110	ENSBTAG00000051453	ENSBTAT00000087376		defensin beta 110 [Source:NCBI gene;Acc:100296935]	23	22651567	22656537	-1
Set_007	Gene_152	533134	MBTPS2	ENSBTAG00000008183	ENSBTAT00000086968	NM_001075981	membrane bound transcription factor peptidase, site 2 [Source:VGNC Symbol;Acc:VGNC:31292]	X	121426231	121470766	-1
Set_007	Gene_153	539767	RASSF5	ENSBTAG00000010427	ENSBTAT00000049612	NM_001113760	Ras association domain family member 5 [Source:VGNC Symbol;Acc:VGNC:33761]	16	4293882	4367194	1
Set_007	Gene_154	NA		ENSBTAG00000039981	ENSBTAT00000053229			11	49196739	49202049	-1
Set_007	Gene_155	112441480	IFNB3	ENSBTAG00000051622	ENSBTAT00000066371	NM_174350	Bos taurus interferon, beta 3 (IFNB3), mRNA. [Source:RefSeq mRNA;Acc:NM_001114297]	8	23206708	23207345	1
Set_007	Gene_156	NA		ENSBTAG00000050994	ENSBTAT00000078661			26	18513593	18513982	1
Set_007	Gene_157	100848290	SCIMP	ENSBTAG00000055017	ENSBTAT00000082921		SLP adaptor and CSK interacting membrane protein [Source:NCBI gene;Acc:100848290]	19	26281863	26301133	1
Set_007	Gene_158	539776	NMBR	ENSBTAG00000043954	ENSBTAT00000061022	NM_001205710	neuromedin B receptor [Source:VGNC Symbol;Acc:VGNC:32124]	9	79578213	79586431	-1
Set_007	Gene_159	100848228	CNTF	ENSBTAG00000003624	ENSBTAT00000004729		ciliary neurotrophic factor [Source:VGNC Symbol;Acc:VGNC:27534]	15	81931958	81933780	1
Set_007	Gene_160	100313451	bta-mir-135b	ENSBTAG00000029815	ENSBTAT00000042194		bta-mir-135b [Source:miRBase;Acc:MI0009738]	16	3197434	3197528	-1
Set_007	Gene_161	511479	MRPL45	ENSBTAG00000025001	ENSBTAT00000034867	NM_001035100	mitochondrial ribosomal protein L45 [Source:VGNC Symbol;Acc:VGNC:31640]	19	38966206	38985585	1
Set_007	Gene_162	613974	ZFAND2A	ENSBTAG00000007402	ENSBTAT00000009732	NM_001083762	zinc finger AN1-type containing 2A [Source:VGNC Symbol;Acc:VGNC:37149]	25	41664183	41672223	1
Set_007	Gene_163	513987		ENSBTAG00000022204	ENSBTAT00000011172		transcription elongation factor A like 4 [Source:NCBI gene;Acc:513987]	X	52344216	52345355	1
Set_007	Gene_164	NA	RF00026	ENSBTAG00000043236	ENSBTAT00000060228			5	5821032	5821128	-1
Set_007	Gene_165	539143	TXNDC9	ENSBTAG00000004544	ENSBTAT00000009353	NM_001076149	thioredoxin domain containing 9 [Source:VGNC Symbol;Acc:VGNC:36540]	11	4443235	4454741	-1
Set_007	Gene_166	534721	DDX47	ENSBTAG00000019608	ENSBTAT00000076989		DEAD-box helicase 47 [Source:VGNC Symbol;Acc:VGNC:27970]	5	97017440	97030497	-1
Set_007	Gene_167	NA		ENSBTAG00000051558	ENSBTAT00000068362			17	55434294	55435295	-1
Set_007	Gene_168	509368	TAAR5	ENSBTAG00000047985	ENSBTAT00000054300		trace amine associated receptor 5 [Source:VGNC Symbol;Acc:VGNC:35554]	9	70753522	70754535	-1
Set_007	Gene_169	NA		ENSBTAG00000022922	ENSBTAT00000076828			NKLS02001524.1	51118	80985	1
Set_007	Gene_170	616128	FXYD7	ENSBTAG00000018326	ENSBTAT00000076367		FXYD domain containing ion transport regulator 7 [Source:VGNC Symbol;Acc:VGNC:29159]	18	45866897	45877787	1
Set_007	Gene_171	505691	CDKN2C	ENSBTAG00000011059	ENSBTAT00000014685	NM_001101054	cyclin dependent kinase inhibitor 2C [Source:VGNC Symbol;Acc:VGNC:27146]	3	95337691	95342769	-1
Set_007	Gene_172	781956	OPRD1	ENSBTAG00000003202	ENSBTAT00000004157	NM_001191148	opioid receptor delta 1 [Source:VGNC Symbol;Acc:VGNC:50539]	2	124630567	124671398	-1
Set_007	Gene_173	112444246	RF00026	ENSBTAG00000045186	ENSBTAT00000062619			24	56851547	56851651	-1
Set_007	Gene_174	NA		ENSBTAG00000048367	ENSBTAT00000086846			9	96630283	96638016	1
Set_007	Gene_175	534891	TMEM63B	ENSBTAG00000032680	ENSBTAT00000028054	NM_001163939	transmembrane protein 63B [Source:VGNC Symbol;Acc:VGNC:36104]	23	17658530	17683153	1
Set_007	Gene_176	508130	MCAT	ENSBTAG00000002413	ENSBTAT00000003130	NM_001244177	malonyl-CoA-acyl carrier protein transacylase [Source:VGNC Symbol;Acc:VGNC:31297]	5	113908102	113919965	-1
Set_007	Gene_177	NA	RF00100	ENSBTAG00000045419	ENSBTAT00000062852			6	26364841	26365161	1
Set_007	Gene_178	112442818	RF00003	ENSBTAG00000051291	ENSBTAT00000049221			19	9651703	9651866	-1
Set_007	Gene_179	104969118		ENSBTAG00000032442	ENSBTAT00000046013		odorant-binding protein-like [Source:NCBI gene;Acc:104969118]	20	66232903	66240156	1
Set_007	Gene_180	NA		ENSBTAG00000050162	ENSBTAT00000082487			12	78293637	78295003	1
Set_007	Gene_181	540947	SS18	ENSBTAG00000011531	ENSBTAT00000071890		SS18, nBAF chromatin remodeling complex subunit [Source:VGNC Symbol;Acc:VGNC:35305]	24	30670051	30746241	1
Set_007	Gene_182	NA		ENSBTAG00000051998	ENSBTAT00000065110			7	72924883	72925263	1
Set_007	Gene_183	786529	SLC25A53	ENSBTAG00000054469	ENSBTAT00000086594	NM_001191233	solute carrier family 25 member 53 [Source:NCBI gene;Acc:786529]	X	52795553	52807365	-1
Set_007	Gene_184	NA	RF00004	ENSBTAG00000029007	ENSBTAT00000041387			16	72812682	72812859	-1
Set_007	Gene_185	510376	ANKRD1	ENSBTAG00000011734	ENSBTAT00000015584	NM_001034378	ankyrin repeat domain 1 [Source:VGNC Symbol;Acc:VGNC:25908]	26	12533095	12542796	-1
Set_007	Gene_186	507047	TAF11	ENSBTAG00000016887	ENSBTAT00000022463	NM_001034276	TATA-box binding protein associated factor 11 [Source:VGNC Symbol;Acc:VGNC:54240]	23	8887254	8894899	-1
Set_007	Gene_187	NA		ENSBTAG00000049284	ENSBTAT00000075845			X	86945509	86945784	1
Set_007	Gene_188	506235	HSF1	ENSBTAG00000020751	ENSBTAT00000083220		heat shock transcription factor 1 [Source:VGNC Symbol;Acc:VGNC:29981]	14	613328	634349	-1
Set_007	Gene_189	515218	PPP6R3	ENSBTAG00000009584	ENSBTAT00000012612	NM_001105372	protein phosphatase 6 regulatory subunit 3 [Source:VGNC Symbol;Acc:VGNC:33275]	29	45936791	46061309	1
Set_007	Gene_190	532834	TRPC4AP	ENSBTAG00000002236	ENSBTAT00000002893	NM_001206830	transient receptor potential cation channel subfamily C member 4 associated protein [Source:VGNC Symbol;Acc:VGNC:36384]	13	64304949	64374165	-1
Set_007	Gene_191	534366	C23H6orf62	ENSBTAG00000020496	ENSBTAT00000027310	NM_001077999	chromosome 23 C6orf62 homolog [Source:VGNC Symbol;Acc:VGNC:52680]	23	33054916	33067994	1
Set_007	Gene_192	514945	BMS1	ENSBTAG00000012878	ENSBTAT00000048816	NM_001206147	BMS1, ribosome biogenesis factor [Source:VGNC Symbol;Acc:VGNC:26527]	28	13197801	13229985	1
Set_007	Gene_193	112448662	RF00026	ENSBTAG00000042731	ENSBTAT00000059723			10	47971129	47971233	1
Set_007	Gene_194	537285	TRIM23	ENSBTAG00000009519	ENSBTAT00000012526	NM_001080303	tripartite motif containing 23 [Source:VGNC Symbol;Acc:VGNC:36320]	20	13938790	13972833	1
Set_007	Gene_195	784202	PPP1R1C	ENSBTAG00000044009	ENSBTAT00000060951	NM_001191352	protein phosphatase 1 regulatory inhibitor subunit 1C [Source:VGNC Symbol;Acc:VGNC:33235]	2	14473125	14594115	-1
Set_007	Gene_196	514753	MRPL50	ENSBTAG00000008962	ENSBTAT00000011798	NM_001046180	mitochondrial ribosomal protein L50 [Source:VGNC Symbol;Acc:VGNC:31645]	8	91113175	91120279	-1
Set_007	Gene_197	NA	RF00001	ENSBTAG00000029291	ENSBTAT00000041670			25	7518566	7518678	1
Set_007	Gene_198	280950	TXN	ENSBTAG00000002953	ENSBTAT00000044356	NM_173968	thioredoxin [Source:VGNC Symbol;Acc:VGNC:56751]	8	99799187	99811602	-1
Set_007	Gene_199	NA		ENSBTAG00000054905	ENSBTAT00000069211			10	4244219	4244754	1
Set_007	Gene_200	NA		ENSBTAG00000051933	ENSBTAT00000082403			16	36218494	36239510	1
Set_007	Gene_201	327700	FABP1	ENSBTAG00000018054	ENSBTAT00000024032	NM_175817	fatty acid binding protein 1 [Source:VGNC Symbol;Acc:VGNC:28695]	11	47917375	47923252	1
Set_007	Gene_202	616622	PRR15L	ENSBTAG00000012249	ENSBTAT00000071908		proline rich 15 like [Source:VGNC Symbol;Acc:VGNC:33394]	19	38510736	38516493	1
Set_007	Gene_203	NA		ENSBTAG00000051177	ENSBTAT00000080043			17	63220087	63222986	-1
Set_007	Gene_204	781568	TRAF4	ENSBTAG00000038990	ENSBTAT00000056164	NM_001101280	TNF receptor associated factor 4 [Source:VGNC Symbol;Acc:VGNC:36276]	19	20162947	20171072	1
Set_007	Gene_205	NA	RF02105	ENSBTAG00000052205	ENSBTAT00000078068			12	19498339	19498460	1
Set_007	Gene_206	618267	AP4S1	ENSBTAG00000017201	ENSBTAT00000070758	NM_001040603	adaptor related protein complex 4 subunit sigma 1 [Source:VGNC Symbol;Acc:VGNC:25994]	21	41679370	41697665	1
Set_007	Gene_207	614380	SLC22A16	ENSBTAG00000010507	ENSBTAT00000028664	NM_001076324	solute carrier family 22 member 16 [Source:VGNC Symbol;Acc:VGNC:34724]	9	39753078	39788314	1
Set_007	Gene_208	NA	RF00100	ENSBTAG00000045366	ENSBTAT00000062799			2	33277179	33277375	-1
Set_007	Gene_209	NA		ENSBTAG00000010871	ENSBTAT00000065025			7	51705072	51715786	1
Set_007	Gene_210	NA	RF02192	ENSBTAG00000053338	ENSBTAT00000077085			21	60493486	60493612	1
Set_007	Gene_211	NA		ENSBTAG00000047343	ENSBTAT00000063710			12	19305384	19305898	1
Set_007	Gene_212	614520	BNIP1	ENSBTAG00000002021	ENSBTAT00000002619	NM_001046539	BCL2 interacting protein 1 [Source:VGNC Symbol;Acc:VGNC:26531]	20	4841533	4854725	1
Set_007	Gene_213	534231	RPN2	ENSBTAG00000014648	ENSBTAT00000057162		ribophorin II [Source:VGNC Symbol;Acc:VGNC:34120]	13	66126440	66197742	1
Set_007	Gene_214	281809	HSD17B10	ENSBTAG00000017779	ENSBTAT00000023642	NM_174334	hydroxysteroid 17-beta dehydrogenase 10 [Source:VGNC Symbol;Acc:VGNC:29969]	X	90870392	90872909	-1
Set_007	Gene_215	281154	FBN1	ENSBTAG00000002278	ENSBTAT00000077684		fibrillin 1 [Source:VGNC Symbol;Acc:VGNC:28885]	10	61653913	61919176	1
Set_007	Gene_216	NA		ENSBTAG00000022931	ENSBTAT00000006062			13	11282593	11301579	-1
Set_007	Gene_217	785580	CPNE9	ENSBTAG00000011551	ENSBTAT00000040272	NM_001099195	copine family member 9 [Source:VGNC Symbol;Acc:VGNC:27665]	22	16985219	17006258	-1
Set_007	Gene_218	100533481	P2RY11	ENSBTAG00000013536	ENSBTAT00000018000	NM_001204449	purinergic receptor P2Y11 [Source:NCBI gene;Acc:100533481]	7	14668284	14670849	1
Set_007	Gene_219	100498838	bta-mir-193a-2	ENSBTAG00000052590	ENSBTAT00000072704		bta-mir-193a-2 [Source:miRBase;Acc:MI0013051]	14	1077714	1077766	-1
Set_007	Gene_220	NA	bta-mir-2285aj	ENSBTAG00000052751	ENSBTAT00000070080		bta-mir-2285aj [Source:miRBase;Acc:MI0032947]	8	70911311	70911391	-1
Set_007	Gene_221	510162	DARS	ENSBTAG00000009949	ENSBTAT00000013123	NM_001035085	aspartyl-tRNA synthetase [Source:VGNC Symbol;Acc:VGNC:27881]	2	61390060	61455629	1
Set_007	Gene_222	NA		ENSBTAG00000051977	ENSBTAT00000086659			8	84889527	84898439	1
Set_007	Gene_223	511085	REX1BD	ENSBTAG00000007739	ENSBTAT00000036534	NM_001075490	required for excision 1-B domain containing [Source:VGNC Symbol;Acc:VGNC:52875]	7	4599480	4602233	-1
Set_007	Gene_224	613777	PTMS	ENSBTAG00000018451	ENSBTAT00000024555		parathymosin [Source:NCBI gene;Acc:613777]	5	103674096	103679056	-1
Set_007	Gene_225	507466	ZC3H10	ENSBTAG00000009542	ENSBTAT00000012550	NM_001097993	zinc finger CCCH-type containing 10 [Source:VGNC Symbol;Acc:VGNC:37096]	5	57197914	57205232	-1
Set_007	Gene_226	506452		ENSBTAG00000048614	ENSBTAT00000078178		olfactory receptor 52B4 [Source:NCBI gene;Acc:506452]	15	50783578	50784522	-1
Set_007	Gene_227	NA		ENSBTAG00000009073	ENSBTAT00000011960			8	85145934	85148106	1
Set_007	Gene_228	NA		ENSBTAG00000052011	ENSBTAT00000066748			10	23439107	23439403	-1
Set_007	Gene_229	112443643	RF00188	ENSBTAG00000050624	ENSBTAT00000060186			2	122649769	122649853	1
Set_007	Gene_230	529391	SYT15	ENSBTAG00000018356	ENSBTAT00000024426	NM_001205963	synaptotagmin 15 [Source:NCBI gene;Acc:529391]	28	41778832	41786982	-1
Set_007	Gene_231	509170	OR6B1	ENSBTAG00000040130	ENSBTAT00000052577		olfactory receptor, family 6, subfamily B, member 1 [Source:NCBI gene;Acc:509170]	4	107202463	107203395	1
Set_007	Gene_232	783944		ENSBTAG00000006042	ENSBTAT00000007934		transmembrane protein 273 [Source:NCBI gene;Acc:783944]	28	43421335	43445677	-1
Set_007	Gene_233	112447224	RF00026	ENSBTAG00000043242	ENSBTAT00000060234		RNA, U6 small nuclear 532, pseudogene [Source:HGNC Symbol;Acc:HGNC:47495]	6	4044741	4044847	-1
Set_007	Gene_234	519789	DYNC1LI2	ENSBTAG00000000458	ENSBTAT00000000581	NM_001206152	dynein cytoplasmic 1 light intermediate chain 2 [Source:VGNC Symbol;Acc:VGNC:28273]	18	34440414	34478171	-1
Set_007	Gene_235	NA		ENSBTAG00000052842	ENSBTAT00000072963			22	43669107	43669567	-1
Set_007	Gene_236	506043	FKBP11	ENSBTAG00000015828	ENSBTAT00000077430		FKBP prolyl isomerase 11 [Source:VGNC Symbol;Acc:VGNC:29018]	5	30881465	30913799	1
Set_007	Gene_237	535362	GRM7	ENSBTAG00000013047	ENSBTAT00000017342	NM_001076055	glutamate metabotropic receptor 7 [Source:VGNC Symbol;Acc:VGNC:29662]	22	18673820	19567204	-1
Set_007	Gene_238	508703	PRAF2	ENSBTAG00000002562	ENSBTAT00000003318	NM_001046009	PRA1 domain family member 2 [Source:VGNC Symbol;Acc:VGNC:33283]	X	87153484	87157001	-1
Set_007	Gene_239	614798	MFSD6L	ENSBTAG00000039012	ENSBTAT00000054541	NM_001102523	major facilitator superfamily domain containing 6 like [Source:VGNC Symbol;Acc:VGNC:55846]	19	28289946	28292101	-1
Set_007	Gene_240	NA		ENSBTAG00000051714	ENSBTAT00000068897			11	37096063	37102467	1
Set_007	Gene_241	NA		ENSBTAG00000051389	ENSBTAT00000079246			18	45927780	45928903	-1
Set_007	Gene_242	618239	MND1	ENSBTAG00000000281	ENSBTAT00000000351	NM_001038223	meiotic nuclear divisions 1 [Source:VGNC Symbol;Acc:VGNC:31538]	17	4218300	4297890	-1
Set_007	Gene_243	NA		ENSBTAG00000037632	ENSBTAT00000052775			5	113082371	113089067	1
Set_007	Gene_244	107133056	EFCAB8	ENSBTAG00000051503	ENSBTAT00000086432		EF-hand calcium binding domain 8 [Source:NCBI gene;Acc:107133056]	13	62220966	62268229	1
Set_007	Gene_245	509161	DLGAP5	ENSBTAG00000002331	ENSBTAT00000003008	NM_001076822	DLG associated protein 5 [Source:VGNC Symbol;Acc:VGNC:28091]	10	67631639	67677160	-1
Set_007	Gene_246	509524	DRC1	ENSBTAG00000009649	ENSBTAT00000012714	NM_001037591	dynein regulatory complex subunit 1 [Source:VGNC Symbol;Acc:VGNC:28205]	11	73094992	73133466	-1
Set_007	Gene_247	NA		ENSBTAG00000051220	ENSBTAT00000084748			1	130075490	130076132	-1
Set_007	Gene_248	785293	IPP	ENSBTAG00000016377	ENSBTAT00000031396	NM_001191196	intracisternal A particle-promoted polypeptide [Source:VGNC Symbol;Acc:VGNC:30247]	3	100332768	100369992	1
Set_007	Gene_249	100313050	bta-mir-449b	ENSBTAG00000030027	ENSBTAT00000042406		bta-mir-449b [Source:miRBase;Acc:MI0009835]	20	23943192	23943289	1
Set_007	Gene_250	509130	AUP1	ENSBTAG00000020123	ENSBTAT00000026802	NM_001015555	AUP1, lipid droplet regulating VLDL assembly factor [Source:VGNC Symbol;Acc:VGNC:26348]	11	10110333	10114465	1
Set_008	Gene_001	NA		ENSBTAG00000055079	ENSBTAT00000070544			13	38859573	38862293	1
Set_008	Gene_002	NA		ENSBTAG00000023792	ENSBTAT00000032643			9	42069410	42069847	-1
Set_008	Gene_003	NA		ENSBTAG00000048556	ENSBTAT00000077928			24	27202155	27234182	1
Set_008	Gene_004	530599		ENSBTAG00000055290	ENSBTAT00000069502		laminin subunit beta-2 [Source:NCBI gene;Acc:530599]	22	50867110	50882602	1
Set_008	Gene_005	NA		ENSBTAG00000045841	ENSBTAT00000065020			25	26300132	26302015	1
Set_008	Gene_006	530411	UHRF1	ENSBTAG00000002224	ENSBTAT00000044908	NM_001103098	ubiquitin like with PHD and ring finger domains 1 [Source:VGNC Symbol;Acc:VGNC:36654]	7	19223877	19257053	-1
Set_008	Gene_007	NA		ENSBTAG00000050666	ENSBTAT00000072986			3	17261487	17263423	-1
Set_008	Gene_008	512846	UEVLD	ENSBTAG00000013568	ENSBTAT00000018040	NM_001098952	UEV and lactate/malate dehyrogenase domains [Source:VGNC Symbol;Acc:VGNC:36643]	29	26137688	26192124	1
Set_008	Gene_009	505545	BSDC1	ENSBTAG00000020655	ENSBTAT00000067186	NM_001035026	BSD domain containing 1 [Source:VGNC Symbol;Acc:VGNC:26578]	2	121176081	121199884	1
Set_008	Gene_010	514448	LPIN2	ENSBTAG00000012060	ENSBTAT00000015997		lipin 2 [Source:VGNC Symbol;Acc:VGNC:30967]	24	37140992	37214261	-1
Set_008	Gene_011	100125225	SLC17A6	ENSBTAG00000038347	ENSBTAT00000007935	NM_001103110	solute carrier family 17 member 6 [Source:VGNC Symbol;Acc:VGNC:34701]	29	22471182	22511619	-1
Set_008	Gene_012	613573	HOXC12	ENSBTAG00000000924	ENSBTAT00000001223	NM_001193221	homeobox C12 [Source:VGNC Symbol;Acc:VGNC:29923]	5	26076092	26077683	-1
Set_008	Gene_013	281549	TRHR	ENSBTAG00000019997	ENSBTAT00000026634	NM_174203	thyrotropin releasing hormone receptor [Source:VGNC Symbol;Acc:VGNC:36306]	14	55317459	55362360	-1
Set_008	Gene_014	112445309	RF00026	ENSBTAG00000042991	ENSBTAT00000059983			X	93296716	93296821	-1
Set_008	Gene_015	NA		ENSBTAG00000035206	ENSBTAT00000034356			28	16523910	16527654	-1
Set_008	Gene_016	787969	KNL1	ENSBTAG00000053398	ENSBTAT00000068526		kinetochore scaffold 1 [Source:NCBI gene;Acc:787969]	10	36179163	36240615	1
Set_008	Gene_017	615074	PRKAR1A	ENSBTAG00000008621	ENSBTAT00000011371	NM_001076358	protein kinase cAMP-dependent type I regulatory subunit alpha [Source:VGNC Symbol;Acc:VGNC:33324]	19	61704501	61718579	-1
Set_008	Gene_018	613898	CENPA	ENSBTAG00000023938	ENSBTAT00000032931	NM_001205380	centromere protein A [Source:NCBI gene;Acc:613898]	11	72792306	72798612	-1
Set_008	Gene_019	NA		ENSBTAG00000049821	ENSBTAT00000077145			8	82409290	82427951	1
Set_008	Gene_020	282254	HSPA1A	ENSBTAG00000025441	ENSBTAT00000017500	NM_203322	heat shock protein family A (Hsp70) member 1A [Source:NCBI gene;Acc:282254]	23	27520317	27522790	-1
Set_008	Gene_021	NA		ENSBTAG00000048497	ENSBTAT00000071140			1	73253996	73257620	1
Set_008	Gene_022	534604	MID1	ENSBTAG00000010152	ENSBTAT00000069917		midline 1 [Source:VGNC Symbol;Acc:VGNC:31464]	X	132157304	132305813	1
Set_008	Gene_023	NA		ENSBTAG00000049023	ENSBTAT00000081645			12	26625368	26707511	1
Set_008	Gene_024	NA		ENSBTAG00000023270	ENSBTAT00000005546			24	10174659	10182121	1
Set_008	Gene_025	536097		ENSBTAG00000054594	ENSBTAT00000012873		tyrosine-protein phosphatase non-receptor type substrate 1 [Source:NCBI gene;Acc:536097]	13	53505053	53517410	1
Set_008	Gene_026	505618	RNASEH2C	ENSBTAG00000005577	ENSBTAT00000007327	NM_001045921	ribonuclease H2 subunit C [Source:VGNC Symbol;Acc:VGNC:34001]	29	43886441	43887760	-1
Set_008	Gene_027	506049	ZCCHC9	ENSBTAG00000005265	ENSBTAT00000006931	NM_001101055	zinc finger CCHC-type containing 9 [Source:NCBI gene;Acc:506049]	7	81294847	81304041	1
Set_008	Gene_028	NA	ZNF234	ENSBTAG00000049610	ENSBTAT00000055214		zinc finger protein 234 [Source:HGNC Symbol;Acc:HGNC:13027]	18	52126678	52131347	1
Set_008	Gene_029	514342		ENSBTAG00000049925	ENSBTAT00000067788		olfactory receptor, family 1, subfamily L, member 1 [Source:NCBI gene;Acc:514342]	11	93791101	93792033	1
Set_008	Gene_030	540060	TWIST2	ENSBTAG00000021444	ENSBTAT00000028589	NM_001083748	twist family bHLH transcription factor 2 [Source:VGNC Symbol;Acc:VGNC:36526]	3	118051375	118103633	1
Set_008	Gene_031	525727	BOLA-DOA	ENSBTAG00000006490	ENSBTAT00000008504	NM_001205920	major histocompatibility complex, class II, DO alpha [Source:NCBI gene;Acc:525727]	23	7315559	7323441	-1
Set_008	Gene_032	112442453	RF00026	ENSBTAG00000054204	ENSBTAT00000081275			18	43587570	43587676	-1
Set_008	Gene_033	783335	IL17RE	ENSBTAG00000010833	ENSBTAT00000014373		interleukin 17 receptor E [Source:VGNC Symbol;Acc:VGNC:30125]	22	16841733	16851718	-1
Set_008	Gene_034	NA		ENSBTAG00000051735	ENSBTAT00000085739			26	34450629	34502062	-1
Set_008	Gene_035	512902	CRAT	ENSBTAG00000001932	ENSBTAT00000070339		carnitine O-acetyltransferase [Source:VGNC Symbol;Acc:VGNC:27687]	11	99559586	99572474	-1
Set_008	Gene_036	NA		ENSBTAG00000051159	ENSBTAT00000073480			19	33264895	33267488	-1
Set_008	Gene_037	515214	ACTRT2	ENSBTAG00000017929	ENSBTAT00000023844	NM_001038115	actin related protein T2 [Source:VGNC Symbol;Acc:VGNC:25590]	16	50032369	50033784	-1
Set_008	Gene_038	100848709	IFNB3	ENSBTAG00000055306	ENSBTAT00000070972	NM_174350	Bos taurus interferon, beta 3 (IFNB3), mRNA. [Source:RefSeq mRNA;Acc:NM_001114297]	8	23191860	23192497	1
Set_008	Gene_039	788561	THNSL1	ENSBTAG00000009117	ENSBTAT00000012015		threonine synthase like 1 [Source:VGNC Symbol;Acc:VGNC:35838]	13	25851589	25853835	1
Set_008	Gene_040	617546	C23H6orf47	ENSBTAG00000023628	ENSBTAT00000032323	NM_001101267	chromosome 23 C6orf47 homolog [Source:VGNC Symbol;Acc:VGNC:52679]	23	27639809	27641450	1
Set_008	Gene_041	511618	LRIT3	ENSBTAG00000007019	ENSBTAT00000009238	NM_001191514	leucine rich repeat, Ig-like and transmembrane domains 3 [Source:VGNC Symbol;Acc:VGNC:53765]	6	15551780	15569552	-1
Set_008	Gene_042	536123	MYO3B	ENSBTAG00000003626	ENSBTAT00000072144		myosin IIIB [Source:VGNC Symbol;Acc:VGNC:31825]	2	25753839	26211202	-1
Set_008	Gene_043	507488	RAB21	ENSBTAG00000053598	ENSBTAT00000086555	NM_001075317	RAB21, member RAS oncogene family [Source:NCBI gene;Acc:507488]	5	1377716	1410175	1
Set_008	Gene_044	NA		ENSBTAG00000026836	ENSBTAT00000086863			1	45273441	45477104	-1
Set_008	Gene_045	531866		ENSBTAG00000007966	ENSBTAT00000030820		tubulin tyrosine ligase-like family, member 3 [Source:NCBI gene;Acc:531866]	22	16888782	16910868	-1
Set_008	Gene_046	505518	C15H11orf34	ENSBTAG00000015810	ENSBTAT00000020999	NM_001113538	chromosome 15 open reading frame, human C11orf34 [Source:NCBI gene;Acc:505518]	15	22642103	22654247	-1
Set_008	Gene_047	281487	PMEL	ENSBTAG00000004019	ENSBTAT00000005250	NM_001080215	premelanosome protein [Source:VGNC Symbol;Acc:VGNC:33069]	5	57343063	57353330	1
Set_008	Gene_048	282353	SLC1A1	ENSBTAG00000019125	ENSBTAT00000025456	NM_174599	solute carrier family 1 member 1 [Source:VGNC Symbol;Acc:VGNC:34711]	8	39928081	40003010	-1
Set_008	Gene_049	532884	MNS1	ENSBTAG00000000271	ENSBTAT00000000337	NM_001046338	meiosis specific nuclear structural 1 [Source:VGNC Symbol;Acc:VGNC:31539]	10	53893423	53977929	1
Set_008	Gene_050	509680	PIGM	ENSBTAG00000002419	ENSBTAT00000003140	NM_001015563	phosphatidylinositol glycan anchor biosynthesis class M [Source:VGNC Symbol;Acc:VGNC:32872]	3	9644360	9647791	1
Set_008	Gene_051	NA		ENSBTAG00000052143	ENSBTAT00000086835			25	33130456	33134853	-1
Set_008	Gene_052	100125948	RNASE2	ENSBTAG00000025664	ENSBTAT00000036230	NM_001105511	ribonuclease A family member 2 [Source:NCBI gene;Acc:100125948]	10	26170839	26171786	-1
Set_008	Gene_053	NA	CCDC62	ENSBTAG00000003527	ENSBTAT00000065548		coiled-coil domain containing 62 [Source:VGNC Symbol;Acc:VGNC:53896]	17	52703453	52724998	-1
Set_008	Gene_054	539841	NSRP1	ENSBTAG00000019341	ENSBTAT00000025760	NM_001046462	nuclear speckle splicing regulatory protein 1 [Source:VGNC Symbol;Acc:VGNC:32284]	19	21237162	21283030	1
Set_008	Gene_055	NA		ENSBTAG00000051247	ENSBTAT00000079628			26	37896228	37897644	1
Set_008	Gene_056	617114	CSTA	ENSBTAG00000010688	ENSBTAT00000014138	NM_001167824	cystatin A [Source:VGNC Symbol;Acc:VGNC:27779]	1	66772681	66783747	1
Set_008	Gene_057	112449420	RF00026	ENSBTAG00000054757	ENSBTAT00000079029			13	62302456	62302562	1
Set_008	Gene_058	NA		ENSBTAG00000048830	ENSBTAT00000075307			2	135163989	135166610	-1
Set_008	Gene_059	NA		ENSBTAG00000016306	ENSBTAT00000021695			1	132547744	132548300	-1
Set_008	Gene_060	539002	CCR2	ENSBTAG00000013586	ENSBTAT00000018066	NM_001194959	Bos taurus C-C motif chemokine receptor 2 (CCR2), mRNA. [Source:RefSeq mRNA;Acc:NM_001194959]	22	53043751	53046271	-1
Set_008	Gene_061	510914	KRT23	ENSBTAG00000040460	ENSBTAT00000052645	NM_001101935	keratin 23 [Source:VGNC Symbol;Acc:VGNC:30722]	19	41116547	41134104	-1
Set_008	Gene_062	100335484	RIPPLY3	ENSBTAG00000051916	ENSBTAT00000078516		ripply transcriptional repressor 3 [Source:NCBI gene;Acc:100335484]	1	149259149	149269725	1
Set_008	Gene_063	534354	MTRF1L	ENSBTAG00000009275	ENSBTAT00000012219	NM_001046378	mitochondrial translational release factor 1 like [Source:VGNC Symbol;Acc:VGNC:31751]	9	89904124	89918662	-1
Set_008	Gene_064	NA		ENSBTAG00000049951	ENSBTAT00000085163			1	135029919	135030904	-1
Set_008	Gene_065	112448651	RF00026	ENSBTAG00000049447	ENSBTAT00000077805			10	52323046	52323152	-1
Set_008	Gene_066	504483	BLMH	ENSBTAG00000021370	ENSBTAT00000028490	NM_001303621	bleomycin hydrolase [Source:VGNC Symbol;Acc:VGNC:26505]	19	21333634	21374924	-1
Set_008	Gene_067	512233	HIPK1	ENSBTAG00000011322	ENSBTAT00000015051	NM_001109998	homeodomain interacting protein kinase 1 [Source:VGNC Symbol;Acc:VGNC:29859]	3	29399811	29449947	-1
Set_008	Gene_068	NA	RF02271	ENSBTAG00000053393	ENSBTAT00000083772			5	26552139	26552320	-1
Set_008	Gene_069	507834	ESRRA	ENSBTAG00000008645	ENSBTAT00000036417	NM_001191373	estrogen related receptor alpha [Source:VGNC Symbol;Acc:VGNC:28608]	29	42603429	42612003	1
Set_008	Gene_070	107131150		ENSBTAG00000054146	ENSBTAT00000078744		olfactory receptor 7A17-like [Source:NCBI gene;Acc:107131150]	7	9126371	9127303	1
Set_008	Gene_071	518781	VPS18	ENSBTAG00000011567	ENSBTAT00000015368	NM_001100380	VPS18, CORVET/HOPS core subunit [Source:VGNC Symbol;Acc:VGNC:36812]	10	36433611	36442758	1
Set_008	Gene_072	616621	PNKP	ENSBTAG00000001834	ENSBTAT00000002397		polynucleotide kinase 3'-phosphatase [Source:VGNC Symbol;Acc:VGNC:33081]	18	56210681	56216339	-1
Set_008	Gene_073	515323	FZD10	ENSBTAG00000007047	ENSBTAT00000009267	NM_001098033	frizzled class receptor 10 [Source:VGNC Symbol;Acc:VGNC:29166]	17	46932749	46934705	-1
Set_008	Gene_074	616292	PRELID3A	ENSBTAG00000017983	ENSBTAT00000046981		PRELI domain containing 3A [Source:VGNC Symbol;Acc:VGNC:33308]	24	42853715	42868611	1
Set_008	Gene_075	540676	IKZF3	ENSBTAG00000011003	ENSBTAT00000014617	NM_001081613	IKAROS family zinc finger 3 [Source:VGNC Symbol;Acc:VGNC:30104]	19	40128960	40213794	-1
Set_008	Gene_076	613462	ARL2BP	ENSBTAG00000004844	ENSBTAT00000006363	NM_001076274	ADP ribosylation factor like GTPase 2 binding protein [Source:VGNC Symbol;Acc:VGNC:26142]	18	25251821	25257892	1
Set_008	Gene_077	NA		ENSBTAG00000051954	ENSBTAT00000086430			20	22561143	22600229	1
Set_008	Gene_078	509896	ABHD4	ENSBTAG00000016658	ENSBTAT00000022154	NM_001034368	abhydrolase domain containing 4 [Source:VGNC Symbol;Acc:VGNC:25501]	10	22200351	22212618	-1
Set_008	Gene_079	NA		ENSBTAG00000052222	ENSBTAT00000070239			3	91786160	91799139	-1
Set_008	Gene_080	100299171	GINS2	ENSBTAG00000044006	ENSBTAT00000061540		GINS complex subunit 2 [Source:VGNC Symbol;Acc:VGNC:29361]	18	11648869	11684545	-1
Set_008	Gene_081	508088	NDE1	ENSBTAG00000015986	ENSBTAT00000077996		nudE neurodevelopment protein 1 [Source:VGNC Symbol;Acc:VGNC:31932]	25	14084540	14144211	1
Set_008	Gene_082	NA		ENSBTAG00000054024	ENSBTAT00000076583			21	7772291	7778218	-1
Set_008	Gene_083	532203	MRPL24	ENSBTAG00000001520	ENSBTAT00000001991	NM_001034576	mitochondrial ribosomal protein L24 [Source:VGNC Symbol;Acc:VGNC:31627]	3	14093466	14098646	1
Set_008	Gene_084	281782	GHRHR	ENSBTAG00000047599	ENSBTAT00000026967	NM_181020	growth hormone releasing hormone receptor [Source:VGNC Symbol;Acc:VGNC:29350]	4	65395787	65411689	-1
Set_008	Gene_085	523867	FADS6	ENSBTAG00000017242	ENSBTAT00000022906	NM_001081722	fatty acid desaturase 6 [Source:VGNC Symbol;Acc:VGNC:28704]	19	56520577	56536561	1
Set_008	Gene_086	529881	C20H5orf22	ENSBTAG00000017569	ENSBTAT00000023356	NM_001075927	chromosome 20 C5orf22 homolog [Source:VGNC Symbol;Acc:VGNC:52670]	20	41983392	41999154	-1
Set_008	Gene_087	520399		ENSBTAG00000050397	ENSBTAT00000065254		olfactory receptor 8K3 [Source:NCBI gene;Acc:520399]	15	79407273	79408214	-1
Set_008	Gene_088	NA		ENSBTAG00000048386	ENSBTAT00000069553			12	32289187	32299958	-1
Set_008	Gene_089	529124	FLI1	ENSBTAG00000008283	ENSBTAT00000071122		Fli-1 proto-oncogene, ETS transcription factor [Source:VGNC Symbol;Acc:VGNC:29031]	29	32051549	32184256	1
Set_008	Gene_090	618673	CCDC183	ENSBTAG00000000933	ENSBTAT00000001235		coiled-coil domain containing 183 [Source:VGNC Symbol;Acc:VGNC:26878]	11	105898128	105908460	1
Set_008	Gene_091	529335	MAP3K15	ENSBTAG00000019855	ENSBTAT00000080276		mitogen-activated protein kinase kinase kinase 15 [Source:VGNC Symbol;Acc:VGNC:31193]	X	123618763	123763627	1
Set_008	Gene_092	NA		ENSBTAG00000052844	ENSBTAT00000077135			19	40623003	40623248	-1
Set_008	Gene_093	515300	TMC2	ENSBTAG00000018811	ENSBTAT00000025041	NM_001113766	transmembrane channel like 2 [Source:VGNC Symbol;Acc:VGNC:35918]	13	52539174	52640959	-1
Set_008	Gene_094	NA	RF00156	ENSBTAG00000045031	ENSBTAT00000062464			14	28027608	28027733	1
Set_008	Gene_095	509355	SYAP1	ENSBTAG00000003316	ENSBTAT00000004296	NM_001034348	synapse associated protein 1 [Source:VGNC Symbol;Acc:VGNC:35502]	X	126782220	126798093	-1
Set_008	Gene_096	533971	SUGP1	ENSBTAG00000006116	ENSBTAT00000066454	NM_001103278	SURP and G-patch domain containing 1 [Source:VGNC Symbol;Acc:VGNC:35463]	7	3965453	3998161	1
Set_008	Gene_097	540068	RETREG1	ENSBTAG00000016444	ENSBTAT00000046417		reticulophagy regulator 1 [Source:VGNC Symbol;Acc:VGNC:33878]	20	56526791	56683260	1
Set_008	Gene_098	100313347	bta-mir-2457	ENSBTAG00000045035	ENSBTAT00000062468		bta-mir-2457 [Source:miRBase;Acc:MI0011516]	7	22129921	22129991	-1
Set_008	Gene_099	534669	GTF2I	ENSBTAG00000009780	ENSBTAT00000066354		general transcription factor IIi [Source:VGNC Symbol;Acc:VGNC:29699]	25	32782209	32863447	-1
Set_008	Gene_100	NA		ENSBTAG00000051774	ENSBTAT00000066847			16	54442089	54446642	-1
Set_008	Gene_101	516881	SGPP1	ENSBTAG00000004430	ENSBTAT00000005808	NM_001077931	sphingosine-1-phosphate phosphatase 1 [Source:VGNC Symbol;Acc:VGNC:34548]	10	75936963	75968043	-1
Set_008	Gene_102	521040	RGS11	ENSBTAG00000016574	ENSBTAT00000022048	NM_001075814	regulator of G protein signaling 11 [Source:VGNC Symbol;Acc:VGNC:33912]	25	299628	304824	-1
Set_008	Gene_103	784254		ENSBTAG00000036116	ENSBTAT00000031225		carbonic anhydrase 1 [Source:NCBI gene;Acc:784254]	14	77194036	77205021	1
Set_008	Gene_104	NA	RF00003	ENSBTAG00000029640	ENSBTAT00000042019			18	14823839	14823992	-1
Set_008	Gene_105	3283885	MT-ND4L	ENSBTAG00000043559	ENSBTAT00000060543		mitochondrially encoded NADH:ubiquinone oxidoreductase core subunit 4L [Source:VGNC Symbol;Acc:VGNC:55744]	MT	10239	10535	1
Set_008	Gene_106	NA		ENSBTAG00000047709	ENSBTAT00000011510			NKLS02002207.1	592732	597360	1
Set_008	Gene_107	516993	NYNRIN	ENSBTAG00000007149	ENSBTAT00000009407	NM_001192459	NYN domain and retroviral integrase containing [Source:VGNC Symbol;Acc:VGNC:32387]	10	20755325	20776134	-1
Set_008	Gene_108	112441546		ENSBTAG00000049727	ENSBTAT00000037575		olfactory receptor 6-like [Source:NCBI gene;Acc:112441546]	15	45942396	45943340	1
Set_008	Gene_109	767905	GLIPR1	ENSBTAG00000011590	ENSBTAT00000015396	NM_001076984	GLI pathogenesis related 1 [Source:VGNC Symbol;Acc:VGNC:29402]	5	4987628	5034033	1
Set_008	Gene_110	100313485	bta-mir-2372	ENSBTAG00000045027	ENSBTAT00000062460		bta-mir-2372 [Source:miRBase;Acc:MI0011407]	22	56057993	56058069	1
Set_008	Gene_111	NA	bta-mir-12057	ENSBTAG00000052385	ENSBTAT00000077788		bta-mir-12057 [Source:miRBase;Acc:MI0038490]	18	50042578	50042646	1
Set_008	Gene_112	540033	DNAJC27	ENSBTAG00000018239	ENSBTAT00000024278	NM_001098109	DnaJ heat shock protein family (Hsp40) member C27 [Source:NCBI gene;Acc:540033]	11	74272582	74310523	1
Set_008	Gene_113	503620	FLT1	ENSBTAG00000016915	ENSBTAT00000086632		fms related tyrosine kinase 1 [Source:VGNC Symbol;Acc:VGNC:29041]	12	31624125	31829369	1
Set_008	Gene_114	NA		ENSBTAG00000051414	ENSBTAT00000074195			11	90104816	90114987	1
Set_008	Gene_115	504771	COQ7	ENSBTAG00000021242	ENSBTAT00000028299	NM_001014849	coenzyme Q7, hydroxylase [Source:VGNC Symbol;Acc:VGNC:27615]	25	16902938	16916479	-1
Set_008	Gene_116	539735	ZMYND15	ENSBTAG00000018316	ENSBTAT00000045384		zinc finger MYND-type containing 15 [Source:VGNC Symbol;Acc:VGNC:37204]	19	26609543	26614671	-1
Set_008	Gene_117	NA	MIRLET7G	ENSBTAG00000029861	ENSBTAT00000042240		microRNA let-7g [Source:HGNC Symbol;Acc:HGNC:31485]	22	48636391	48636497	1
Set_008	Gene_118	NA		ENSBTAG00000051346	ENSBTAT00000070045			5	95822472	95825005	1
Set_008	Gene_119	NA		ENSBTAG00000050782	ENSBTAT00000086335			20	37168341	37169789	1
Set_008	Gene_120	514131	BCNT2	ENSBTAG00000030600	ENSBTAT00000043232	NM_001077919	bucentaur-2 [Source:NCBI gene;Acc:514131]	18	2763307	2799457	-1
Set_008	Gene_121	529245	ORC4	ENSBTAG00000015291	ENSBTAT00000020335		origin recognition complex subunit 4 [Source:VGNC Symbol;Acc:VGNC:32449]	2	48181494	48275918	1
Set_008	Gene_122	NA	BCAS1	ENSBTAG00000000835	ENSBTAT00000052163		breast carcinoma amplified sequence 1 [Source:HGNC Symbol;Acc:HGNC:974]	13	81424938	81524746	-1
Set_008	Gene_123	112442116	RF00026	ENSBTAG00000050635	ENSBTAT00000077800			17	59325625	59325731	1
Set_008	Gene_124	511624	COQ6	ENSBTAG00000020331	ENSBTAT00000087393		coenzyme Q6, monooxygenase [Source:VGNC Symbol;Acc:VGNC:27614]	10	85333909	85348765	1
Set_008	Gene_125	NA	bta-mir-2285bf-2	ENSBTAG00000049702	ENSBTAT00000075532		bta-mir-2285bf-2 [Source:miRBase;Acc:MI0038207]	X	118759089	118759145	-1
Set_008	Gene_126	112443648	RF00190	ENSBTAG00000042986	ENSBTAT00000059978			2	124852030	124852164	1
Set_008	Gene_127	NA		ENSBTAG00000054797	ENSBTAT00000078033			1	132419127	132742565	1
Set_008	Gene_128	790244	TMEM170A	ENSBTAG00000015428	ENSBTAT00000020505	NM_001099213	transmembrane protein 170A [Source:NCBI gene;Acc:790244]	18	2806374	2819530	-1
Set_008	Gene_129	112449649	RF00026	ENSBTAG00000042375	ENSBTAT00000059367			14	53573484	53573586	1
Set_008	Gene_130	784069	HSF5	ENSBTAG00000001166	ENSBTAT00000001549		heat shock transcription factor 5 [Source:VGNC Symbol;Acc:VGNC:29985]	19	9393890	9436547	-1
Set_008	Gene_131	507126	THEMIS2	ENSBTAG00000006223	ENSBTAT00000008171		thymocyte selection associated family member 2 [Source:VGNC Symbol;Acc:VGNC:35836]	2	125473679	125486124	-1
Set_008	Gene_132	518715	SHD	ENSBTAG00000039696	ENSBTAT00000061173	NM_001205518	Src homology 2 domain containing transforming protein D [Source:VGNC Symbol;Acc:VGNC:34594]	7	19783231	19791715	-1
Set_008	Gene_133	100126054	SPIN2B	ENSBTAG00000046769	ENSBTAT00000065449	NM_001105656	spindlin family member 2B [Source:NCBI gene;Acc:100126054]	X	94099596	94101552	-1
Set_008	Gene_134	526363	GRIK4	ENSBTAG00000017146	ENSBTAT00000022788	NM_001192626	glutamate ionotropic receptor kainate type subunit 4 [Source:VGNC Symbol;Acc:VGNC:54882]	15	31274172	31606902	1
Set_008	Gene_135	112444364	RF00026	ENSBTAG00000043497	ENSBTAT00000060489			25	9193013	9193118	-1
Set_008	Gene_136	100313264	bta-mir-449a	ENSBTAG00000030121	ENSBTAT00000042499		bta-mir-449a [Source:miRBase;Acc:MI0009834]	20	23943316	23943403	1
Set_008	Gene_137	539029	AMER1	ENSBTAG00000008839	ENSBTAT00000011639		APC membrane recruitment protein 1 [Source:VGNC Symbol;Acc:VGNC:25861]	X	96120226	96146246	1
Set_008	Gene_138	513929	FKBPL	ENSBTAG00000037781	ENSBTAT00000051941	NM_001101982	FKBP prolyl isomerase like [Source:VGNC Symbol;Acc:VGNC:29028]	23	27252845	27254424	1
Set_008	Gene_139	516237	MSLN	ENSBTAG00000000177	ENSBTAT00000082222		mesothelin [Source:NCBI gene;Acc:516237]	25	650311	653932	1
Set_008	Gene_140	NA		ENSBTAG00000054984	ENSBTAT00000071923			20	35069917	35075579	1
Set_008	Gene_141	541257	NR6A1	ENSBTAG00000040585	ENSBTAT00000052227		nuclear receptor subfamily 6 group A member 1 [Source:VGNC Symbol;Acc:VGNC:32250]	11	95553002	95774429	-1
Set_008	Gene_142	533206	PDS5A	ENSBTAG00000017809	ENSBTAT00000023680		PDS5 cohesin associated factor A [Source:VGNC Symbol;Acc:VGNC:32717]	6	58887610	59020226	-1
Set_008	Gene_143	530936	SLITRK4	ENSBTAG00000011780	ENSBTAT00000015639		SLIT and NTRK like family member 4 [Source:VGNC Symbol;Acc:VGNC:34965]	X	26759608	26762121	-1
Set_008	Gene_144	613326	PTP4A1	ENSBTAG00000002275	ENSBTAT00000002933	NM_001354592	protein tyrosine phosphatase type IVA, member 1 [Source:VGNC Symbol;Acc:VGNC:33523]	9	448438	458072	1
Set_008	Gene_145	768319	MT1E	ENSBTAG00000038706	ENSBTAT00000046456		metallothionein 1E [Source:NCBI gene;Acc:768319]	18	24029352	24032186	-1
Set_008	Gene_146	NA		ENSBTAG00000050199	ENSBTAT00000077177			X	84650639	84652144	-1
Set_008	Gene_147	404183	EED	ENSBTAG00000007847	ENSBTAT00000010324	NM_001040494	embryonic ectoderm development [Source:VGNC Symbol;Acc:VGNC:28332]	29	9265425	9295980	-1
Set_008	Gene_148	574092	SPINK1	ENSBTAG00000015558	ENSBTAT00000020673	NM_001025348	serine peptidase inhibitor, Kazal type 1 [Source:VGNC Symbol;Acc:VGNC:35219]	7	59050296	59057347	-1
Set_008	Gene_149	533114	CDKL2	ENSBTAG00000014038	ENSBTAT00000031574	NM_001103274	cyclin dependent kinase like 2 [Source:VGNC Symbol;Acc:VGNC:27139]	6	90413362	90454715	-1
Set_008	Gene_150	512927	TLDC2	ENSBTAG00000022005	ENSBTAT00000084378		TBC/LysM-associated domain containing 2 [Source:VGNC Symbol;Acc:VGNC:35890]	13	65914512	65925739	1
Set_008	Gene_151	NA		ENSBTAG00000055206	ENSBTAT00000085127			1	157501070	157505106	-1
Set_008	Gene_152	112445901		ENSBTAG00000054589	ENSBTAT00000077457		olfactory receptor 12-like [Source:NCBI gene;Acc:112445901]	3	119168028	119168978	-1
Set_008	Gene_153	617625	RBM43	ENSBTAG00000016217	ENSBTAT00000021579	NM_001099168	RNA binding motif protein 43 [Source:VGNC Symbol;Acc:VGNC:33802]	2	44857602	44869106	1
Set_008	Gene_154	526335		ENSBTAG00000024788	ENSBTAT00000016656		olfactory receptor 140 [Source:NCBI gene;Acc:526335]	15	78050177	78051085	1
Set_008	Gene_155	538874	BMP10	ENSBTAG00000000992	ENSBTAT00000001312	NM_001192118	bone morphogenetic protein 10 [Source:VGNC Symbol;Acc:VGNC:26515]	11	67211523	67219184	-1
Set_008	Gene_156	527922	INMT	ENSBTAG00000001448	ENSBTAT00000001898	NM_001192648	indolethylamine N-methyltransferase [Source:NCBI gene;Acc:527922]	4	65603906	65608037	1
Set_008	Gene_157	107131598		ENSBTAG00000022947	ENSBTAT00000031184		60S ribosomal protein L30-like [Source:NCBI gene;Acc:107131598]	21	21540535	21540819	-1
Set_008	Gene_158	NA		ENSBTAG00000050120	ENSBTAT00000064072			3	119330082	119332384	1
Set_008	Gene_159	522319	BROX	ENSBTAG00000007595	ENSBTAT00000009990	NM_001205894	BRO1 domain and CAAX motif containing [Source:VGNC Symbol;Acc:VGNC:26571]	16	26208022	26226551	1
Set_008	Gene_160	520410	LRRC10B	ENSBTAG00000047786	ENSBTAT00000065621	NM_001204828	leucine rich repeat containing 10B [Source:VGNC Symbol;Acc:VGNC:52797]	29	39978830	39980989	1
Set_008	Gene_161	617339	FBXO36	ENSBTAG00000010338	ENSBTAT00000043458	NM_001082617	F-box protein 36 [Source:VGNC Symbol;Acc:VGNC:56108]	2	117962254	118069148	1
Set_008	Gene_162	NA		ENSBTAG00000049694	ENSBTAT00000074637			X	38897826	38898761	-1
Set_008	Gene_163	281058	CD69	ENSBTAG00000002135	ENSBTAT00000002767	NM_174014	CD69 molecule [Source:VGNC Symbol;Acc:VGNC:27043]	5	100297983	100305080	1
Set_008	Gene_164	535834	SRD5A3	ENSBTAG00000014913	ENSBTAT00000019855	NM_001206090	steroid 5 alpha-reductase 3 [Source:VGNC Symbol;Acc:VGNC:35273]	6	70803119	70819349	1
Set_008	Gene_165	504795	FHL3	ENSBTAG00000007300	ENSBTAT00000009604	NM_001034223	four and a half LIM domains 3 [Source:VGNC Symbol;Acc:VGNC:29001]	3	107959452	107967135	1
Set_008	Gene_166	508633	CD8B	ENSBTAG00000008956	ENSBTAT00000033046	NM_001105344	CD8b molecule [Source:NCBI gene;Acc:508633]	11	48044725	48064460	1
Set_008	Gene_167	510334	NEURL1	ENSBTAG00000003741	ENSBTAT00000071563	NM_001192253	neuralized E3 ubiquitin protein ligase 1 [Source:VGNC Symbol;Acc:VGNC:32013]	26	24085526	24160165	1
Set_008	Gene_168	100296238		ENSBTAG00000053451	ENSBTAT00000065198		bone morphogenetic protein 8b [Source:NCBI gene;Acc:100296238]	3	106294530	106324412	1
Set_008	Gene_169	NA		ENSBTAG00000015045	ENSBTAT00000064680			25	2241515	2245766	-1
Set_008	Gene_170	NA		ENSBTAG00000051250	ENSBTAT00000073000			18	45699623	45706164	-1
Set_008	Gene_171	112448315	RF00394	ENSBTAG00000042702	ENSBTAT00000059694		small nucleolar RNA, H/ACA box 4 [Source:HGNC Symbol;Acc:HGNC:32587]	1	80469761	80469901	-1
Set_008	Gene_172	614703	PSMA8	ENSBTAG00000017698	ENSBTAT00000023541		proteasome subunit alpha 8 [Source:VGNC Symbol;Acc:VGNC:33443]	24	30636287	30657276	-1
Set_008	Gene_173	NA		ENSBTAG00000052204	ENSBTAT00000066982			4	98476141	98549793	1
Set_008	Gene_174	280897	PLG	ENSBTAG00000001271	ENSBTAT00000053284		plasminogen [Source:NCBI gene;Acc:280897]	9	96575183	96622803	-1
Set_008	Gene_175	512027	SIT1	ENSBTAG00000011411	ENSBTAT00000046141	NM_001206418	signaling threshold regulating transmembrane adaptor 1 [Source:VGNC Symbol;Acc:VGNC:34637]	8	59827546	59829096	-1
Set_008	Gene_176	615792	REST	ENSBTAG00000011789	ENSBTAT00000078549		RE1-silencing transcription factor [Source:NCBI gene;Acc:507148]	6	72173295	72331847	1
Set_008	Gene_177	504975	TLL2	ENSBTAG00000011743	ENSBTAT00000015593		tolloid like 2 [Source:VGNC Symbol;Acc:VGNC:35896]	26	17703169	17846407	-1
Set_008	Gene_178	280845	LTA	ENSBTAG00000000016	ENSBTAT00000000018	NM_001013401	lymphotoxin alpha [Source:VGNC Symbol;Acc:VGNC:31066]	23	27720176	27721739	-1
Set_008	Gene_179	100313193	bta-mir-2403	ENSBTAG00000044888	ENSBTAT00000062321		bta-mir-2403 [Source:miRBase;Acc:MI0011445]	28	15386293	15386367	1
Set_008	Gene_180	NA		ENSBTAG00000052720	ENSBTAT00000072221			26	15208967	15215069	-1
Set_008	Gene_181	531489	WDR34	ENSBTAG00000015343	ENSBTAT00000020398	NM_001206205	WD repeat domain 34 [Source:VGNC Symbol;Acc:VGNC:36893]	11	99159372	99179482	-1
Set_008	Gene_182	521064		ENSBTAG00000013274	ENSBTAT00000065404		centromere protein V [Source:NCBI gene;Acc:521064]	19	33274633	33282679	1
Set_008	Gene_183	514467	SALL1	ENSBTAG00000008544	ENSBTAT00000011264	NM_001205790	spalt like transcription factor 1 [Source:VGNC Symbol;Acc:VGNC:34264]	18	19546249	19560362	-1
Set_008	Gene_184	523894	ARL14EP	ENSBTAG00000012417	ENSBTAT00000081767		ADP ribosylation factor like GTPase 14 effector protein [Source:VGNC Symbol;Acc:VGNC:26140]	15	61047198	61061504	1
Set_008	Gene_185	281068	CGN1	ENSBTAG00000047317	ENSBTAT00000003773	NM_175699	conglutinin [Source:NCBI gene;Acc:281068]	28	35390874	35401997	1
Set_008	Gene_186	NA		ENSBTAG00000053798	ENSBTAT00000071773			10	26456676	26457758	1
Set_008	Gene_187	281683	CNMD	ENSBTAG00000025502	ENSBTAT00000035859	NM_174269	chondromodulin [Source:VGNC Symbol;Acc:VGNC:27507]	12	11051612	11086878	1
Set_008	Gene_188	614694	NUP58	ENSBTAG00000015225	ENSBTAT00000032888	NM_001098129	nucleoporin 58 [Source:VGNC Symbol;Acc:VGNC:32363]	12	33897705	33926079	-1
Set_008	Gene_189	618505	AP5S1	ENSBTAG00000008439	ENSBTAT00000011104	NM_001034811	adaptor related protein complex 5 subunit sigma 1 [Source:VGNC Symbol;Acc:VGNC:25997]	13	51378950	51383204	-1
Set_008	Gene_190	512897	RAD52	ENSBTAG00000005225	ENSBTAT00000055617	NM_001024525	RAD52 homolog, DNA repair protein [Source:VGNC Symbol;Acc:VGNC:33688]	5	107708193	107734428	-1
Set_008	Gene_191	510772	PNLIPRP2	ENSBTAG00000000765	ENSBTAT00000015106	NM_001105355	pancreatic lipase related protein 2 [Source:NCBI gene;Acc:510772]	26	37019951	37039831	1
Set_008	Gene_192	112448304	RF00092	ENSBTAG00000042475	ENSBTAT00000059467		small nucleolar RNA, H/ACA box 63 [Source:HGNC Symbol;Acc:HGNC:10106]	1	80470085	80470216	-1
Set_008	Gene_193	781626	FOXK1	ENSBTAG00000019310	ENSBTAT00000025710		forkhead box K1 [Source:NCBI gene;Acc:781626]	25	39217519	39269527	-1
Set_008	Gene_194	540652	GALNT8	ENSBTAG00000017378	ENSBTAT00000023106		polypeptide N-acetylgalactosaminyltransferase 8 [Source:VGNC Symbol;Acc:VGNC:56203]	5	105403376	105441458	-1
Set_008	Gene_195	404072	CCL11	ENSBTAG00000004129	ENSBTAT00000005406	NM_205773	chemokine (C-C motif) ligand 11 [Source:NCBI gene;Acc:404072]	19	15867084	15869981	-1
Set_008	Gene_196	NA		ENSBTAG00000051432	ENSBTAT00000067885			8	104181438	104188793	-1
Set_008	Gene_197	NA		ENSBTAG00000053327	ENSBTAT00000079035			27	6576606	6577718	-1
Set_008	Gene_198	540278	MRPL35	ENSBTAG00000004823	ENSBTAT00000006331	NM_001192391	mitochondrial ribosomal protein L35 [Source:VGNC Symbol;Acc:VGNC:31632]	11	48659309	48665790	-1
Set_008	Gene_199	NA		ENSBTAG00000052848	ENSBTAT00000066866			10	65424495	65424822	1
Set_008	Gene_200	519714	TTLL2	ENSBTAG00000031481	ENSBTAT00000044620	NM_001075793	tubulin tyrosine ligase like 2 [Source:VGNC Symbol;Acc:VGNC:55086]	9	101983669	101992479	-1
Set_008	Gene_201	540545	SYT13	ENSBTAG00000001703	ENSBTAT00000002230	NM_001098115	synaptotagmin 13 [Source:VGNC Symbol;Acc:VGNC:35539]	15	75297582	75339698	-1
Set_008	Gene_202	112445816		ENSBTAG00000049774	ENSBTAT00000083879		proto-oncogene DBL-like [Source:NCBI gene;Acc:112445816]	NKLS02002208.1	5430756	5510316	1
Set_008	Gene_203	504316	COCH	ENSBTAG00000021844	ENSBTAT00000075985	NM_001077842	cochlin [Source:VGNC Symbol;Acc:VGNC:27545]	21	41526381	41540316	1
Set_008	Gene_204	508880	MTG2	ENSBTAG00000014442	ENSBTAT00000019208	NM_001014874	mitochondrial ribosome associated GTPase 2 [Source:VGNC Symbol;Acc:VGNC:31729]	13	55018299	55025069	-1
Set_008	Gene_205	535458	GALNT3	ENSBTAG00000013957	ENSBTAT00000018541	NM_001192858	polypeptide N-acetylgalactosaminyltransferase 3 [Source:VGNC Symbol;Acc:VGNC:29232]	2	30545764	30569913	1
Set_008	Gene_206	102465276	bta-mir-2285o-4	ENSBTAG00000045271	ENSBTAT00000062704		bta-mir-2285o-4 [Source:miRBase;Acc:MI0022297]	24	40953704	40953781	1
Set_008	Gene_207	504649	SNX19	ENSBTAG00000013076	ENSBTAT00000017386	NM_001302940	sorting nexin 19 [Source:VGNC Symbol;Acc:VGNC:35099]	29	36942605	36975284	-1
Set_008	Gene_208	515434	ACRBP	ENSBTAG00000034246	ENSBTAT00000048539		acrosin binding protein [Source:VGNC Symbol;Acc:VGNC:25558]	5	103786617	103794308	1
Set_008	Gene_209	529052	SLC18B1	ENSBTAG00000015242	ENSBTAT00000020271		solute carrier family 18 member B1 [Source:VGNC Symbol;Acc:VGNC:34708]	9	70929915	70965392	-1
Set_008	Gene_210	NA		ENSBTAG00000054015	ENSBTAT00000067026			1	5489982	5490224	-1
Set_008	Gene_211	100313446	bta-mir-2404-2	ENSBTAG00000050316	ENSBTAT00000067282		bta-mir-2404-2 [Source:miRBase;Acc:MI0011535]	8	73407097	73407163	-1
Set_008	Gene_212	767831	ZNF668	ENSBTAG00000006650	ENSBTAT00000008736	NM_001076953	zinc finger protein 668 [Source:VGNC Symbol;Acc:VGNC:37326]	25	27175346	27184380	-1
Set_008	Gene_213	NA		ENSBTAG00000051319	ENSBTAT00000070213			18	45060090	45061152	1
Set_008	Gene_214	512237	PER2	ENSBTAG00000001879	ENSBTAT00000063277		period circadian regulator 2 [Source:NCBI gene;Acc:512237]	3	117558885	117599971	-1
Set_008	Gene_215	527410	PREX1	ENSBTAG00000015609	ENSBTAT00000043215		phosphatidylinositol-3,4,5-trisphosphate dependent Rac exchange factor 1 [Source:VGNC Symbol;Acc:VGNC:57017]	13	76841312	77021815	-1
Set_008	Gene_216	112446982		ENSBTAG00000044154	ENSBTAT00000061561		keratin-associated protein 6-2-like [Source:NCBI gene;Acc:112446982]	1	4957550	4957843	-1
Set_008	Gene_217	NA	RF00001	ENSBTAG00000036823	ENSBTAT00000051323			28	2948554	2948674	1
Set_008	Gene_218	NA		ENSBTAG00000050509	ENSBTAT00000084419			26	23343222	23344238	-1
Set_008	Gene_219	513091	NUMA1	ENSBTAG00000018449	ENSBTAT00000024553	NM_001205746	nuclear mitotic apparatus protein 1 [Source:VGNC Symbol;Acc:VGNC:32348]	15	51643265	51673852	-1
Set_008	Gene_220	615365	C21H14orf180	ENSBTAG00000022775	ENSBTAT00000071360		chromosome 21 C14orf180 homolog [Source:NCBI gene;Acc:615365]	21	69058229	69068334	1
Set_008	Gene_221	508448	PSMC3	ENSBTAG00000021744	ENSBTAT00000028983	NM_001192184	proteasome 26S subunit, ATPase 3 [Source:VGNC Symbol;Acc:VGNC:33456]	15	77250425	77258901	-1
Set_008	Gene_222	281724	CRYGS	ENSBTAG00000003140	ENSBTAT00000004084	NM_174292	crystallin gamma S [Source:VGNC Symbol;Acc:VGNC:27743]	1	80690735	80696502	1
Set_008	Gene_223	NA		ENSBTAG00000054700	ENSBTAT00000077931			7	4928081	4978568	1
Set_008	Gene_224	615982	PHLPP1	ENSBTAG00000045832	ENSBTAT00000066319		PH domain and leucine rich repeat protein phosphatase 1 [Source:VGNC Symbol;Acc:VGNC:32840]	24	61054481	61278037	1
Set_008	Gene_225	513939	GSDMD	ENSBTAG00000021474	ENSBTAT00000087110		gasdermin D [Source:VGNC Symbol;Acc:VGNC:29675]	14	1139890	1146602	-1
Set_008	Gene_226	514880	METTL17	ENSBTAG00000006613	ENSBTAT00000078462	NM_001038542	methyltransferase like 17 [Source:VGNC Symbol;Acc:VGNC:55124]	10	26119686	26125451	-1
Set_008	Gene_227	281918	MRVI1	ENSBTAG00000007129	ENSBTAT00000082053		murine retrovirus integration site 1 homolog [Source:NCBI gene;Acc:281918]	15	41959236	42098627	1
Set_008	Gene_228	112445029		ENSBTAG00000054899	ENSBTAT00000073706		sodium/hydrogen exchanger 6-like [Source:NCBI gene;Acc:112445029]	X	19616065	19664470	1
Set_008	Gene_229	511059	FRYL	ENSBTAG00000000137	ENSBTAT00000000158	NM_001206589	FRY like transcription coactivator [Source:VGNC Symbol;Acc:VGNC:29123]	6	67179392	67325259	-1
Set_008	Gene_230	518001	CCDC63	ENSBTAG00000032353	ENSBTAT00000045892	NM_001075763	coiled-coil domain containing 63 [Source:VGNC Symbol;Acc:VGNC:26907]	17	54667570	54705547	1
Set_008	Gene_231	782132	ZMAT2	ENSBTAG00000005441	ENSBTAT00000007159	NM_001080343	zinc finger matrin-type 2 [Source:VGNC Symbol;Acc:VGNC:37191]	7	51825588	51830683	1
Set_008	Gene_232	517880	SPACA5	ENSBTAG00000046069	ENSBTAT00000063388	NM_001040536	sperm acrosome associated 5 [Source:NCBI gene;Acc:517880]	X	86452251	86454588	1
Set_008	Gene_233	NA		ENSBTAG00000053074	ENSBTAT00000069902			17	57978412	57983671	-1
Set_008	Gene_234	782442	GPR17	ENSBTAG00000006261	ENSBTAT00000008214	NM_001082470	G protein-coupled receptor 17 [Source:VGNC Symbol;Acc:VGNC:29568]	2	4872953	4878988	-1
Set_008	Gene_235	538466	TECTB	ENSBTAG00000006689	ENSBTAT00000046061		tectorin beta [Source:VGNC Symbol;Acc:VGNC:35733]	26	32815958	32835691	1
Set_008	Gene_236	540730	ASCL4	ENSBTAG00000046402	ENSBTAT00000065448		achaete-scute family bHLH transcription factor 4 [Source:VGNC Symbol;Acc:VGNC:26208]	5	71006144	71006650	1
Set_008	Gene_237	NA		ENSBTAG00000052605	ENSBTAT00000084201			7	51947791	51948198	-1
Set_008	Gene_238	782160	PPP1R3D	ENSBTAG00000027397	ENSBTAT00000039322		protein phosphatase 1 regulatory subunit 3D [Source:VGNC Symbol;Acc:VGNC:33245]	13	56608374	56609273	1
Set_008	Gene_239	533861	MAPKAP1	ENSBTAG00000010271	ENSBTAT00000070428	NM_001081603	mitogen-activated protein kinase associated protein 1 [Source:VGNC Symbol;Acc:VGNC:31228]	11	96283674	96516604	-1
Set_008	Gene_240	100141158	USP48	ENSBTAG00000006940	ENSBTAT00000009110		ubiquitin specific peptidase 48 [Source:VGNC Symbol;Acc:VGNC:36733]	2	131012510	131085750	1
Set_008	Gene_241	NA		ENSBTAG00000049623	ENSBTAT00000081806			20	31300181	31304035	1
Set_008	Gene_242	538957	TGFB3	ENSBTAG00000012004	ENSBTAT00000015925	NM_001101183	transforming growth factor beta 3 [Source:VGNC Symbol;Acc:VGNC:35803]	10	87237844	87271480	-1
Set_008	Gene_243	520269	ZNF536	ENSBTAG00000007262	ENSBTAT00000084215		zinc finger protein 536 [Source:VGNC Symbol;Acc:VGNC:37299]	18	40827492	41221033	1
Set_008	Gene_244	780855	PPIP5K2	ENSBTAG00000001485	ENSBTAT00000001944	NM_001191152	diphosphoinositol pentakisphosphate kinase 2 [Source:VGNC Symbol;Acc:VGNC:33207]	7	102142230	102225206	1
Set_008	Gene_245	100125312	UBAC2	ENSBTAG00000005682	ENSBTAT00000070267		UBA domain containing 2 [Source:VGNC Symbol;Acc:VGNC:36568]	12	76079653	76300630	1
Set_008	Gene_246	512024	CACFD1	ENSBTAG00000015097	ENSBTAT00000020090	NM_001080263	calcium channel flower domain containing 1 [Source:VGNC Symbol;Acc:VGNC:26670]	11	104352204	104361244	1
Set_008	Gene_247	529318	MEX3C	ENSBTAG00000014886	ENSBTAT00000019818		mex-3 RNA binding family member C [Source:VGNC Symbol;Acc:VGNC:31420]	24	50647147	50667734	-1
Set_008	Gene_248	112446047		ENSBTAG00000048944	ENSBTAT00000071016		olfactory receptor 12-like [Source:NCBI gene;Acc:112446047]	3	119620391	119621371	1
Set_008	Gene_249	NA		ENSBTAG00000049165	ENSBTAT00000080035			1	71229011	71238780	1
[truncated: 23,001 more rows]
