# Supplementary material for: Integrative Genomics of the Mammalian Alveolar Macrophage Response to Intracellular Mycobacteria
Source: Research Square preprint supplement (doi:10.21203/rs.3.rs-121955/v1), 2020-12-10
Supplement: Supplementary file 5 [file a9a15fa0913a054f47d45c18.docx]

**Supplementary Figures**

**
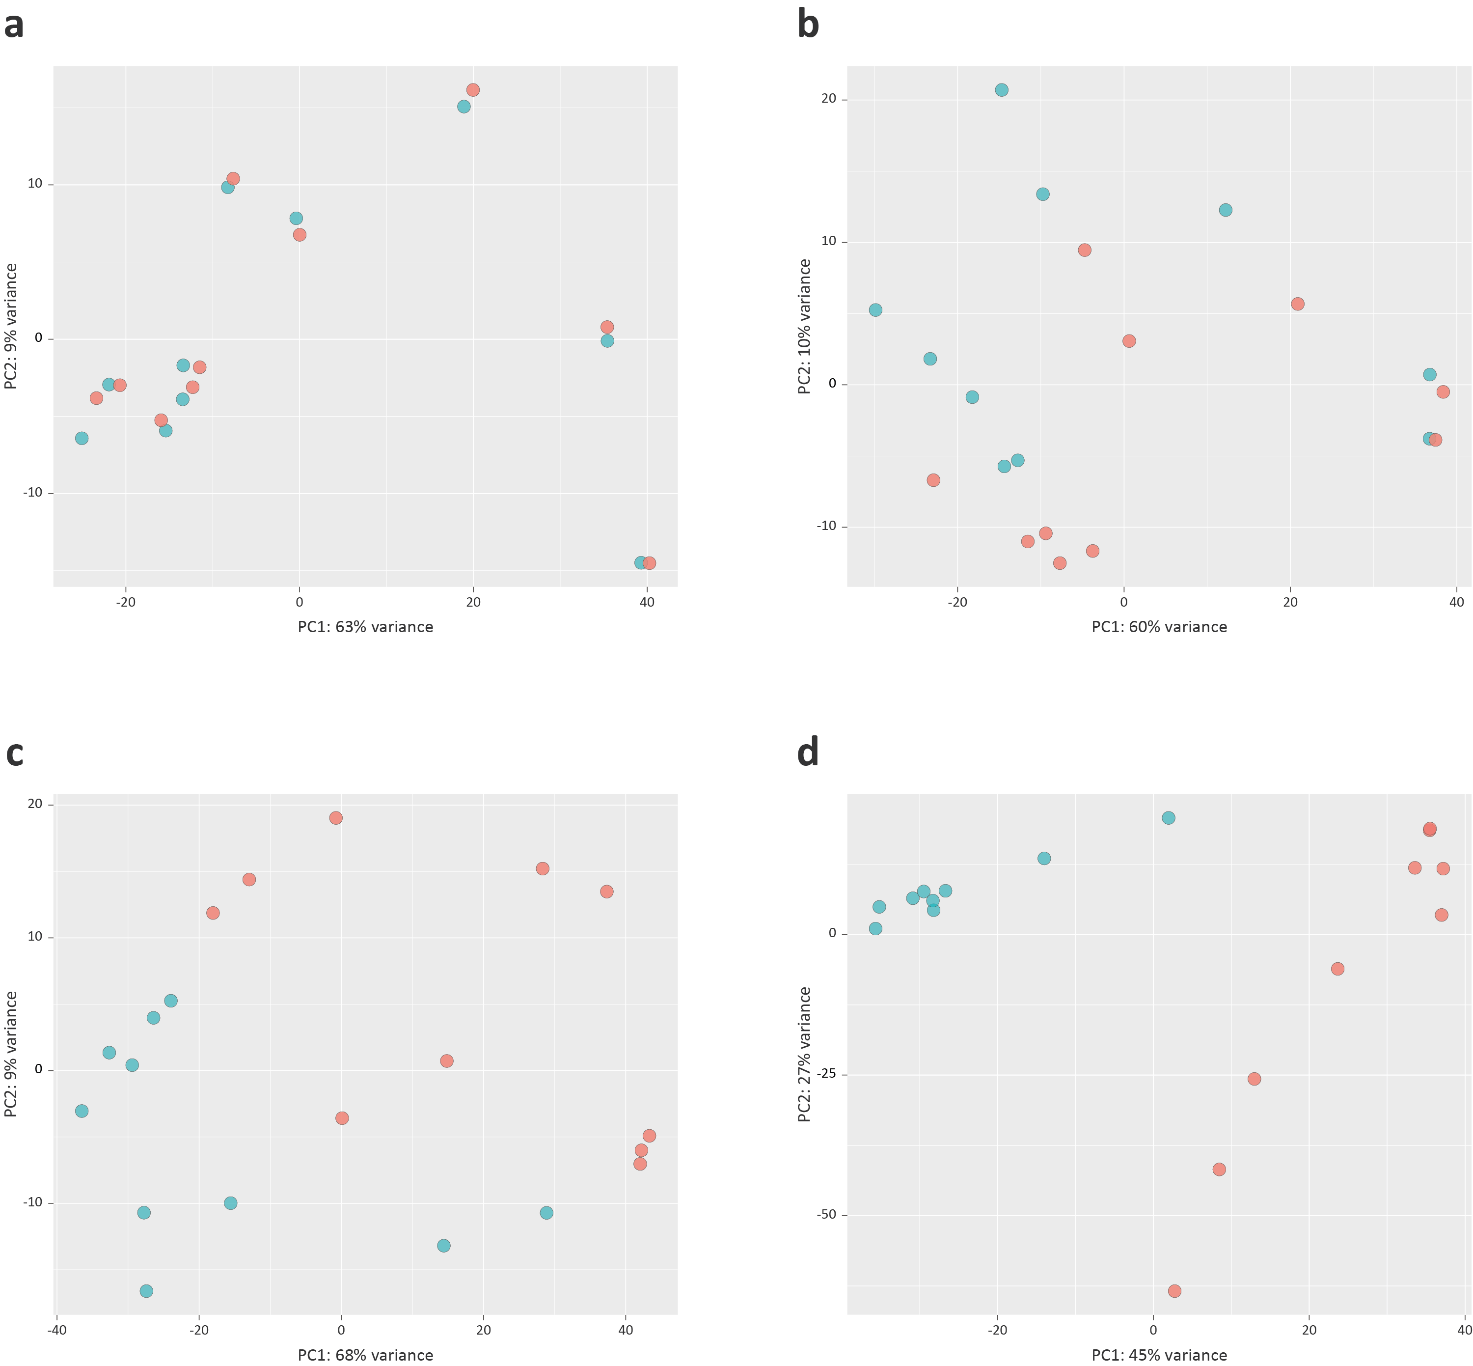
**

**S1 Fig.** Principal component analysis (PCA) plots for individual animal bAM gene expression data at **a** 2 hpi, **b** 6 hpi, **c** 24 hpi, and **d** 48 hpi. Red indicates *M. bovis*-infected animals and blue indicates non-infected control animals.

**
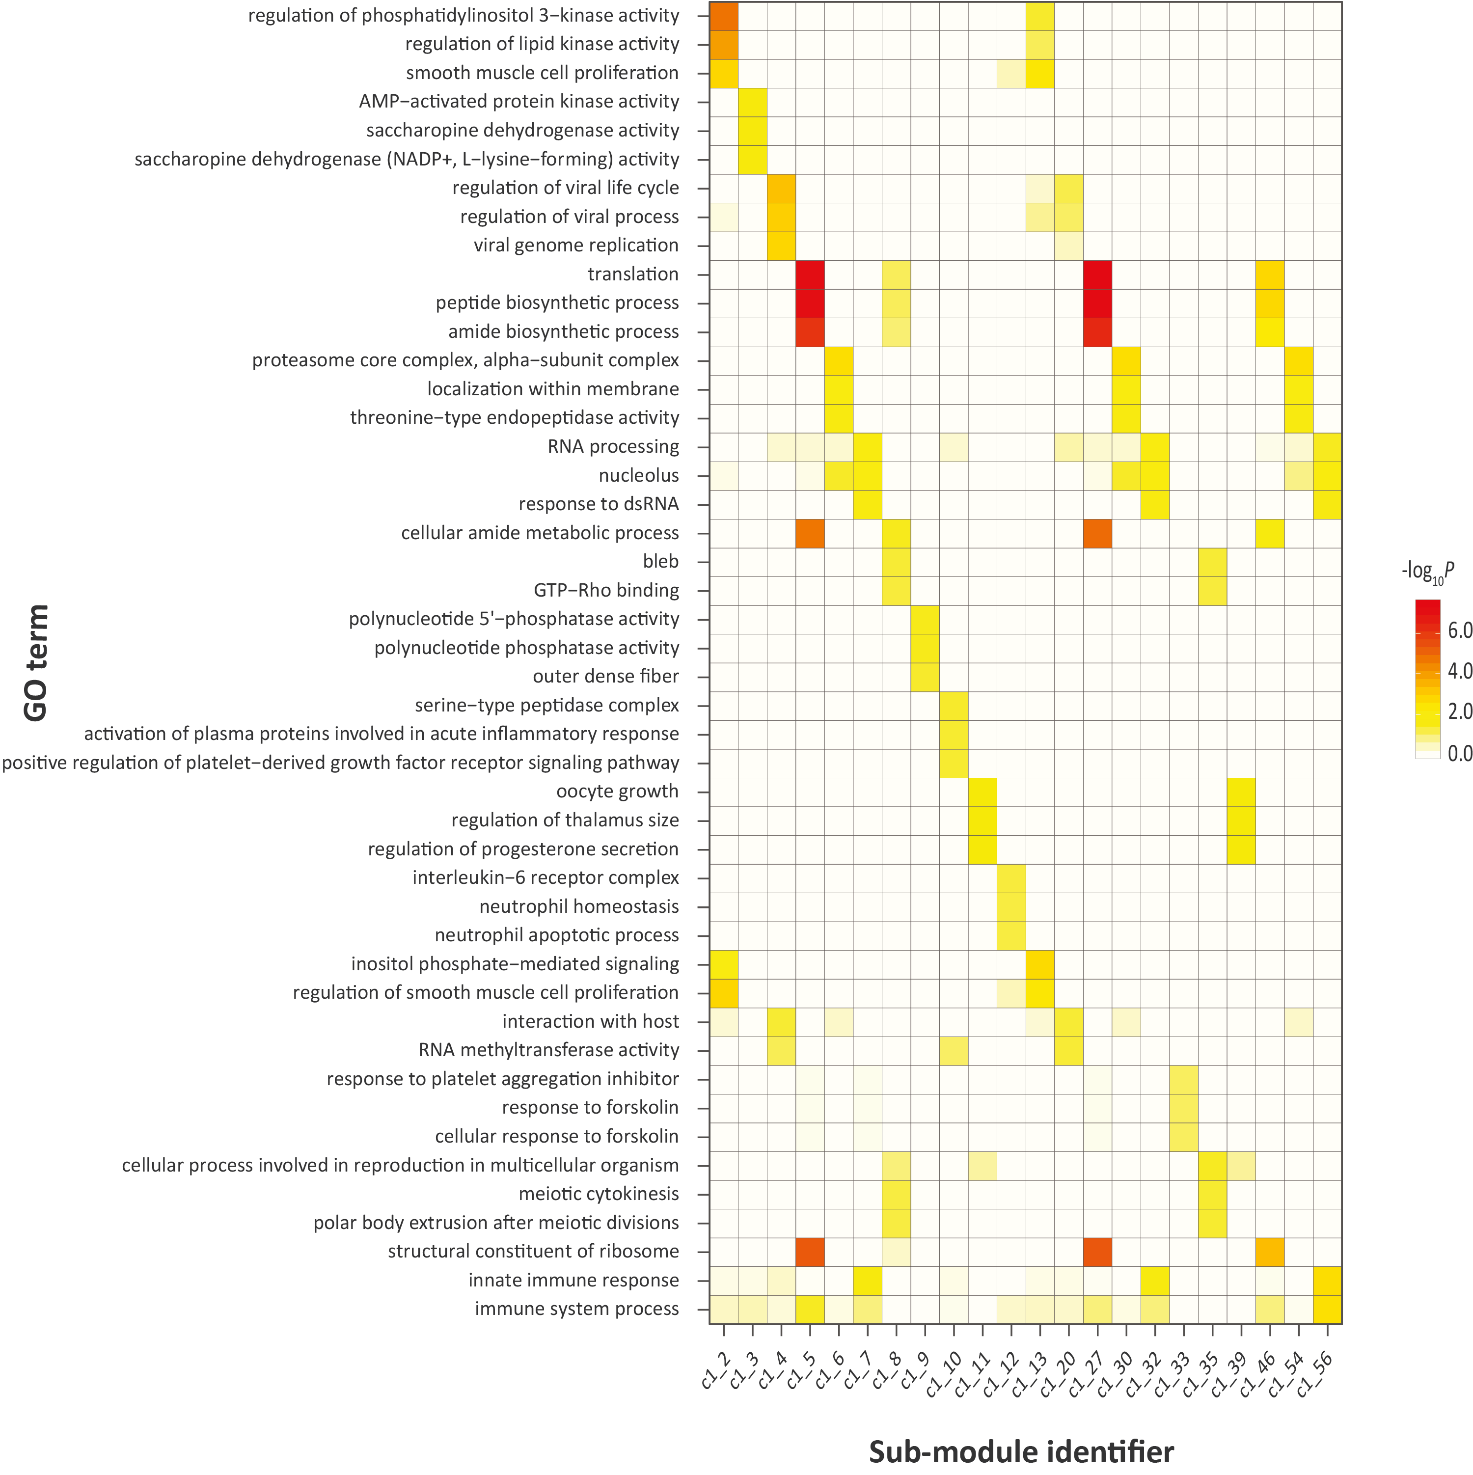
**

**S2 Fig.** Gene ontology (GO) enrichment for functional modules identified from the differential co-expression correlation network generated from *M. bovis*-infected bAM gene expression at 24 hpi.

**
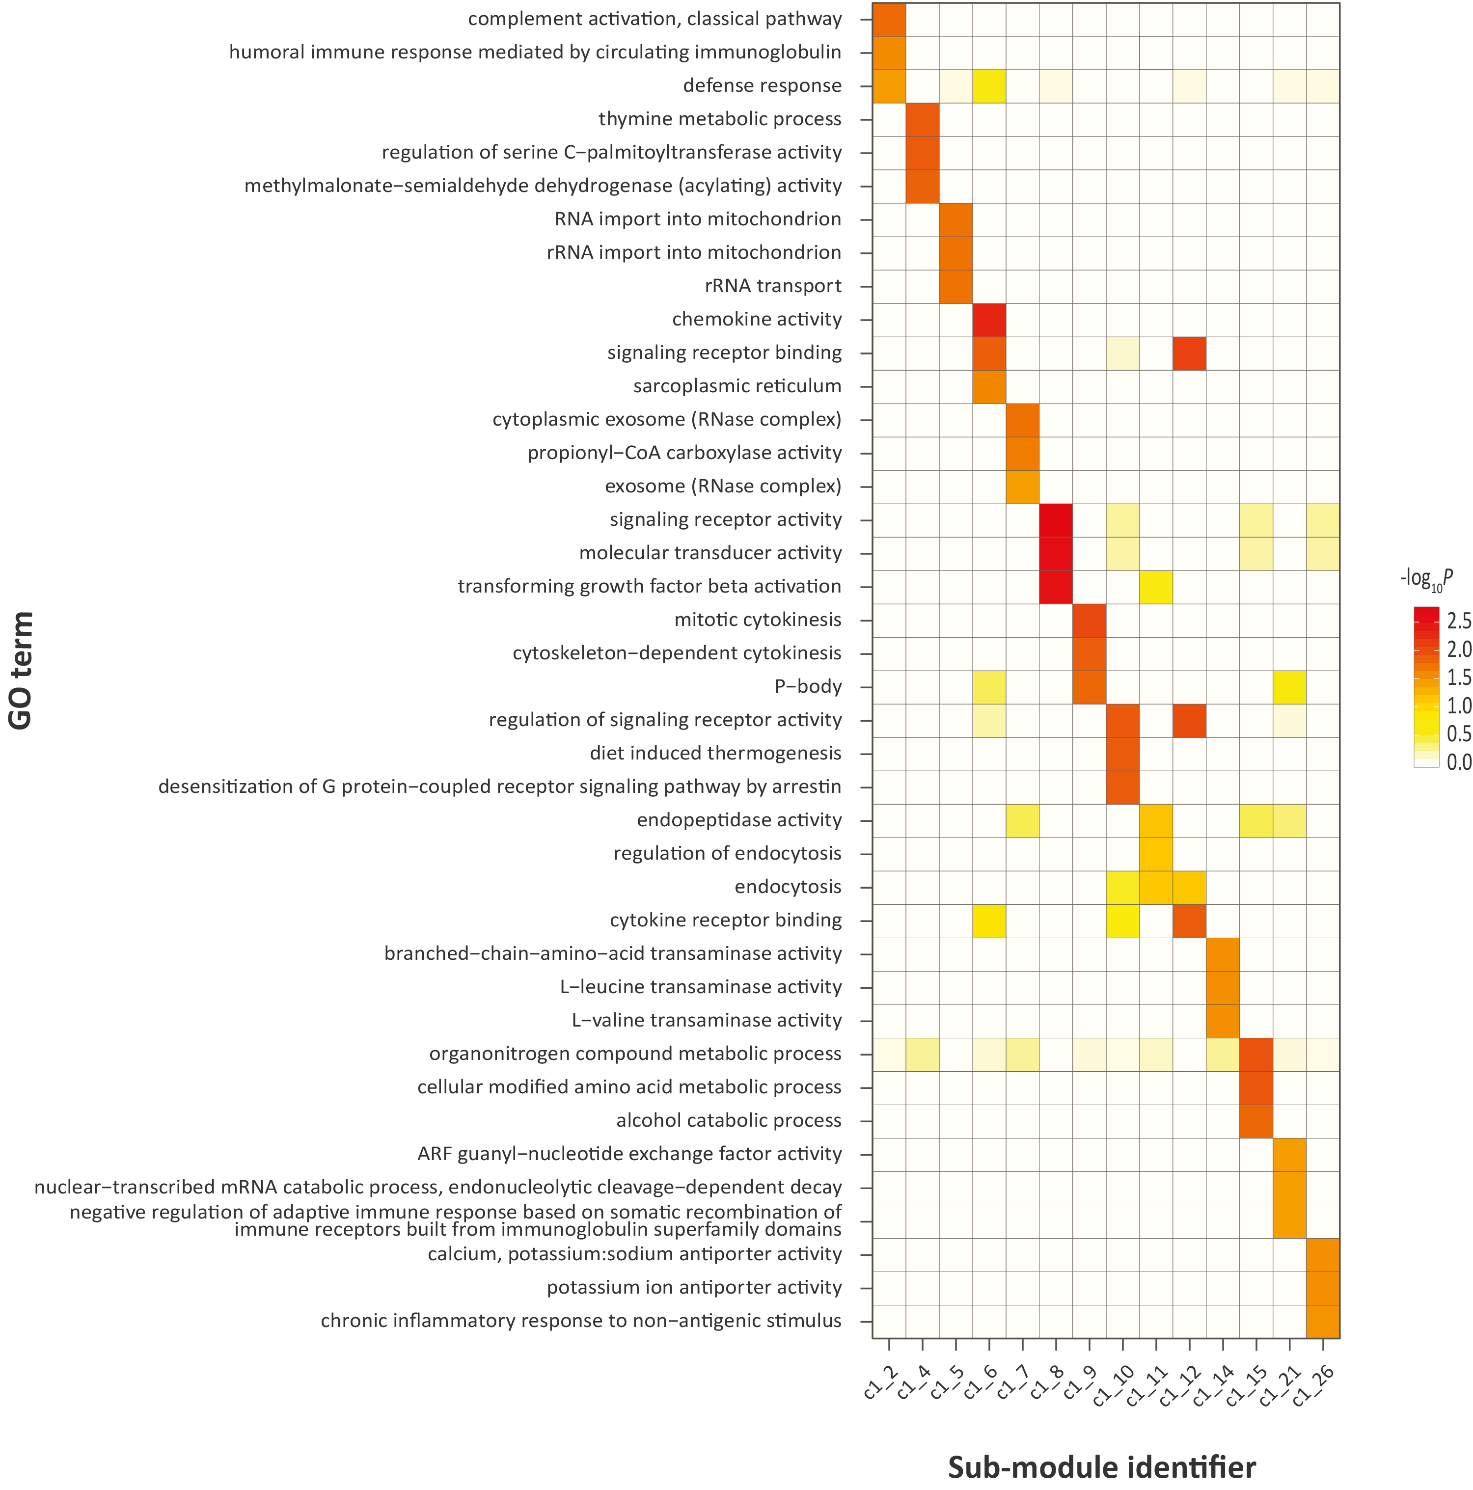
**

**S3 Fig.** Gene ontology (GO) enrichment for functional modules identified from the differential co-expression correlation network generated from *M. bovis*-infected bAM gene expression at 48 hpi.
